# Supplementary material for: Physical frailty and health-related quality of life among Chinese rural older adults: a moderated mediation analysis of physical disability and physical activity
Source: PubMed Central journal article supplement — BMJ Open. 2021 Jan 8;11(1):e042496. doi: 10.1136/bmjopen-2020-042496 (PMC7799141; doi:10.1136/bmjopen-2020-042496), 2021-01-08
Supplement: bmjopen-2020-042496.draft_revisions.pdf [file bmjopen-2020-042496.draft_revisions.pdf]

# BMJ Open

BMJ Open is committed to open peer review. As part of this commitment we make the peer review history of every article we publish publicly available.

When an article is published we post the peer reviewers' comments and the authors' responses online. We also post the versions of the paper that were used during peer review. These are the versions that the peer review comments apply to.

The versions of the paper that follow are the versions that were submitted during the peer review process. They are not the versions of record or the final published versions. They should not be cited or distributed as the published version of this manuscript.

BMJ Open is an open access journal and the full, final, typeset and author-corrected version of record of the manuscript is available on our site with no access controls, subscription charges or pay-per-view fees (<http://bmjopen.bmj.com>).

If you have any questions on BMJ Open's open peer review process please email [info.bmjopen@bmj.com](mailto:info.bmjopen@bmj.com)

# BMJ Open

## Physical frailty and health-related quality of life among Chinese rural older adults: A moderated mediation analysis of physical disability and physical activity

|                               |                                                                                                                                                                                                                                                                                                                                                                                                                                                                                                                                                                                     |
|-------------------------------|-------------------------------------------------------------------------------------------------------------------------------------------------------------------------------------------------------------------------------------------------------------------------------------------------------------------------------------------------------------------------------------------------------------------------------------------------------------------------------------------------------------------------------------------------------------------------------------|
| Journal:                      | <i>BMJ Open</i>                                                                                                                                                                                                                                                                                                                                                                                                                                                                                                                                                                     |
| Manuscript ID                 | bmjopen-2020-042496                                                                                                                                                                                                                                                                                                                                                                                                                                                                                                                                                                 |
| Article Type:                 | Original research                                                                                                                                                                                                                                                                                                                                                                                                                                                                                                                                                                   |
| Date Submitted by the Author: | 07-Jul-2020                                                                                                                                                                                                                                                                                                                                                                                                                                                                                                                                                                         |
| Complete List of Authors:     | Hao, Wenting; School of public health<br>Li, Jie; Shandong University School of Public Health<br>Fu, Peipei; Shandong University Cheeloo College of Medicine<br>Zhao, Dan; Shandong University, school of public health<br>Jing, Zhengyue; Shandong University Cheeloo College of Medicine<br>wang, yi; Shandong University Cheeloo College of Medicine<br>Yu, Caiting; Shandong University Cheeloo College of Medicine<br>Yuan, Yemin; Shandong University School of Public Health<br>Zhou, Chengchao; Shandong University, School of Public Health;<br>Shandong University, China |
| Keywords:                     | Public health < INFECTIOUS DISEASES, Quality in health care < HEALTH SERVICES ADMINISTRATION & MANAGEMENT, SOCIAL MEDICINE                                                                                                                                                                                                                                                                                                                                                                                                                                                          |
|                               |                                                                                                                                                                                                                                                                                                                                                                                                                                                                                                                                                                                     |

SCHOLARONE™  
Manuscripts

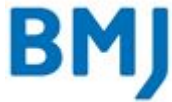

I, the Submitting Author has the right to grant and does grant on behalf of all authors of the Work (as defined in the below author licence), an exclusive licence and/or a non-exclusive licence for contributions from authors who are: i) UK Crown employees; ii) where BMJ has agreed a CC-BY licence shall apply, and/or iii) in accordance with the terms applicable for US Federal Government officers or employees acting as part of their official duties; on a worldwide, perpetual, irrevocable, royalty-free basis to BMJ Publishing Group Ltd ("BMJ") its licensees and where the relevant Journal is co-owned by BMJ to the co-owners of the Journal, to publish the Work in this journal and any other BMJ products and to exploit all rights, as set out in our [licence](#).

The Submitting Author accepts and understands that any supply made under these terms is made by BMJ to the Submitting Author unless you are acting as an employee on behalf of your employer or a postgraduate student of an affiliated institution which is paying any applicable article publishing charge ("APC") for Open Access articles. Where the Submitting Author wishes to make the Work available on an Open Access basis (and intends to pay the relevant APC), the terms of reuse of such Open Access shall be governed by a Creative Commons licence – details of these licences and which [Creative Commons](#) licence will apply to this Work are set out in our licence referred to above.

Other than as permitted in any relevant BMJ Author's Self Archiving Policies, I confirm this Work has not been accepted for publication elsewhere, is not being considered for publication elsewhere and does not duplicate material already published. I confirm all authors consent to publication of this Work and authorise the granting of this licence.

1  
2  
3  
4 1 **Physical frailty and health-related quality of life among Chinese rural older adults: A**  
5  
6 2 **moderated mediation analysis of physical disability and physical activity**

7  
8 3 Wenting Hao<sup>1</sup>, Jie Li<sup>1</sup>, Peipei Fu<sup>2</sup>, Dan Zhao<sup>1</sup>, Zhengyue Jing<sup>1</sup>, Yi Wang<sup>1</sup>, Caiting Yu<sup>1</sup>, Yemin  
9  
10 4 Yuan<sup>1</sup>, Chengchao Zhou<sup>1,3\*</sup>

11  
12  
13 5  
14  
15 6 <sup>1</sup> School of Public Health, Cheeloo College of Medicine, Shandong University, Jinan, Shandong,  
16  
17 7 China

18  
19 8 <sup>2</sup> School of Health Care Management, Cheeloo College of Medicine, Shandong University,  
20  
21 9 Jinan, Shandong, China

22  
23  
24 10 <sup>3</sup> NHC Key Laboratory of Health Economics and Policy Research, Shandong University, Jinan,  
25  
26 11 Shandong, China

27  
28  
29  
30  
31 13 **Corresponding Author:**

32  
33  
34 14 Chengchao Zhou, M.D., Ph.D., 44 Wen-hua-xi Road, Shandong University, Jinan 250012, China

35  
36 15 Tel: 86-531-88381567 Fax : 86-531-88382553

37  
38  
39 16 E-mail: zhouchengchao@sdu.edu.cn

40  
41 17 Word count:3330

1  
2  
3  
4 25 **Abstract**

5  
6 26 **Objectives:** The purpose of this study is to explore the mediating effect of physical disability, as  
7  
8  
9 27 well as the role of physical activity (PA) as a moderator in the relationship between physical  
10  
11  
12 28 frailty and health-related quality of life (HRQoL) among rural older adults in China.

13  
14 29 **Design:** Cross-sectional analysis.

15  
16  
17 30 **Setting:** Rural households in Shandong of China (Rushan, Qufu, Laolin).

18  
19 31 **Participants and methods:** A survey was conducted among 3,243 rural older adults. The data  
20  
21  
22 32 were collected using questionnaires measuring physical frailty, physical disability, HRQoL and  
23  
24  
25 33 PA. Bootstrap analyses were employed to explore the mediating effect of physical disability on  
26  
27  
28 34 physical frailty and HRQoL, and the moderating role of PA.

29  
30 35 **Results:** After controlling for age and education, physical disability partially mediated the effect  
31  
32  
33 36 of physical frailty on HRQoL [indirect effect = -0.143, 95% confidence intervals (CI) = -0.175, -  
34  
35  
36 37 0.113], with the mediating effect accounting for 33.71% of the total effect. PA moderated the  
37  
38  
38 38 relationship between physical frailty and physical disability, as well as the relationship between  
39  
40  
40 39 physical disability and HRQoL.

41  
42  
43 40 **Conclusions:** PA can moderate the indirect effect of physical disability on the association  
44  
45  
46 41 between physical frailty and HRQoL. This study helps to understand the mechanism underlying  
47  
48  
48 42 the association between physical frailty and HRQoL. Encouraging the rural older adults to  
49  
50  
51 43 increase PA appropriately might improve the HRQoL for the older adults with physical frailty  
52  
53  
54 44 and physical disability problems.

55  
56 45

1  
2  
3  
4 46 **Key words:** HRQoL; Physical activity; Physical frailty; Physical disability; Rural older adults;  
5  
6  
7 47 Moderated mediation analysis

8  
9 48 **Strengths and limitations of this study**

- 10  
11  
12 49 1. Few studies have assessed the moderating and mediating factors of the relationship between  
13  
14 50 physical frailty and HRQoL in rural older adults specifically.  
15  
16  
17 51 2. Our study will help to elucidate the underlying mechanism of the relationship between  
18  
19 52 physical frailty and HRQoL and form an effective way to improve the HRQoL of the older  
20  
21 53 adults in rural areas.  
22  
23  
24 54 3. The latest EQ-5D -5L health utility scores method refers to Chinese integral conversion table,  
25  
26 55 which is more suitable for the measurement of the Chinese population.  
27  
28  
29 56 4. The data we used cannot predict the causal relationship.  
30  
31  
32 57 5. More potential mechanisms related to physical frailty and HRQoL among the older adults  
33  
34 58 need to be explored in the future.  
35  
36  
37  
38  
39  
40  
41  
42  
43  
44  
45  
46  
47  
48  
49  
50  
51  
52  
53  
54  
55  
56  
57  
58  
59  
60  
61  
62  
63  
64  
65  
66

## 1. Introduction

Population aging has become a global social problem. As one of the world's most aging countries, China had 249 million people aged over 60 years in 2018, accounting for 17.9 percent of the total population<sup>1</sup>. It is predicted that by 2050, the older adults over 60 will account for more than 35.1% of the total population<sup>2</sup>. With the increasing aging population and the extension of life expectancy, improving the health-related quality of life (HRQoL) of the older adults is an important public health issue. HRQoL is a predictive factor of mortality in the older adults<sup>3</sup>. Compared with urban older adults, the HRQoL of rural older adults is worse<sup>4,5</sup>, which needs more attention.

Physical frailty is a medical syndrome caused by a variety of etiologies and causes, which is characterized by a decline in physical strength, endurance, and decreased physiological function<sup>6</sup>. With the increase of age, the risk of physical frailty increases<sup>7</sup>. Frailty may lead to negative health consequences, including fall, reduced activity, reduced independence, frequent hospitalization, and disability<sup>8</sup>. These adverse outcomes resulted in a decline in the quality of life of the older adults. Previous cross-sectional and longitudinal studies have shown that frailty was negatively associated with HRQoL<sup>9,10</sup>. In addition, the HRQoL in older adults with frailty is poorer than the non-frailty older adults<sup>11</sup>. Although the association between physical frailty and quality of life has been confirmed, the underlying mechanism remains unclear.

The prevalence of physical disability is high among the frail older adults<sup>12,13</sup>. Some studies showed physical frailty was closely related to disability<sup>14,15</sup>, and might be the precursor and cause of disability<sup>16</sup>. A national longitudinal study of 7,439 people over age 65 in US showed that

1  
2  
3  
4 88 frailty was a strong predictor of disability<sup>17</sup>. A prospective two-year cohort study in Japan also  
5  
6 89 showed that frailty and prophase of frailty increased the risk of disability<sup>18</sup>. These findings  
7  
8  
9 90 suggest that physical frailty is associated with disability in older adults. Studies have also  
10  
11 91 demonstrated that the quality of life worsened as the degree of disability increased, and the more  
12  
13  
14 92 severe the disability, the worse the quality of life<sup>19</sup>. Compared with non-disabled older adults,  
15  
16  
17 93 disabled older adults are more prone to fall, depression, anxiety, etc., and their HRQoL was  
18  
19  
20 94 significantly reduced. Therefore, frailty may have an indirect effect on individual's HRQoL  
21  
22 95 through the mediating effect of physical disability.

23  
24  
25 96 Physical frailty is considered to be reversible and preventable<sup>20</sup>. Physical activity(PA) is a  
26  
27 97 key factor of reverse and prevent frailty in the older adults<sup>21</sup>. Studies have found that physical  
28  
29  
30 98 activity moderated the relationship between chronic illness and functional limitations, and  
31  
32  
33 99 moderated functional disability and body function<sup>22-23</sup>. PA can alleviate the decline of physical  
34  
35 100 function in the older adults and has a beneficial effect on functional limitations, physical frailty,  
36  
37  
38 101 disability and quality of life in the older adults<sup>24-26</sup>. Studies indicated the positive effect of  
39  
40  
41 102 physical activity on reducing adverse events caused by frailty in older people. Performing a  
42  
43 103 physical activity of moderate to vigorous intensity would improve physical frailty and prevent  
44  
45  
46 104 the occurrence of disability when compared to the performance of a physical activity of low  
47  
48  
49 105 intensity, ultimately promote older adults' quality of life<sup>27-29</sup>. Therefore, we speculate that PA  
50  
51 106 may moderate the relationship between frailty and physical disability, and between physical  
52  
53  
54 107 disability and HRQoL.

55  
56 108 In the present study, we aim to explore the relationship between physical frailty and



1  
2  
3  
4 109 HRQoL, focusing on the mediating role of physical disability and the moderating role of PA in  
5  
6 110 the relationship between physical frailty and HRQoL. The conceptual framework of the  
7  
8  
9 111 moderated mediation model was shown in Fig. 1.  
10  
11  
12 112

## 13 14 113 **2. Methods**

### 15 16 17 114 **2.1.1 Design and sample**

18  
19 115 This study was conducted from May to June, 2019 in Shandong province, China. A multistage  
20  
21  
22 116 stratified cluster sampling method was used to select participants, which was described in detail  
23  
24  
25 117 in a paper we have previously published<sup>30</sup>. Three rural counties (Qufu, Laoling and Rushan) were  
26  
27  
28 118 selected according to the GDP per capita (2018) in Shandong. Within each selected county, five  
29  
30  
31 119 townships were randomly selected. Then, four villages were selected from each selected  
32  
33  
34 120 townships and the elderly aged over 60 years old who were randomly selected from sample  
35  
36  
37 121 villages. All participants completed the questionnaire independently. The survey was completed  
38  
39  
40 122 in about an hour, and the investigators checked the questionnaires when the participants returned  
41  
42  
43 123 them. A total of 3,600 respondents were recruited from 60 villages and 15 townships in 3 rural  
44  
45  
46 124 counties in Shandong province, of whom 3,243 completed the entire survey, with a response rate  
47  
48  
49 125 of 90.05%.

### 50 126 **2.2. Variables and measurement**

#### 51 127 **2.2.1 Independent variable**

52 128 Physical frailty was measured by Frailty Phenotype<sup>31</sup>. The scale is a widely used frailty screening  
53  
54  
55 129 scale with good reliability and validity<sup>32 33</sup>. Frailty was defined based on the following five  
56  
57  
58  
59  
60

1  
2  
3  
4 130 aspects: weight loss, exhaustion, low physical activity level, slowness, weakness. ①Weight  
5  
6  
7 131 loss: In the past 1 year, participants' body mass index (BMI) decreased by >5.0% (except for  
8  
9  
10 132 personal deliberate weight loss). ②Exhaustion: Using the Center for Epidemiological Studies-  
11  
12 133 Depression(CES-D)<sup>34</sup> : “How often in the last week did you feel this way?” (1) I could not get  
13  
14 134 going and (2) I felt everything I did was an effort. Either of the above two questions that  
15  
16  
17 135 participants answered 3-4 days and most of the time, was considered exhaustion.③Low physical  
18  
19  
20 136 activity level: According the International Physical Activity Questionnaire-short Form (IPAQ-  
21  
22 137 SF)<sup>35 36</sup> , we used standard algorithms to calculate the Kcals consumed per week. The criterion is  
23  
24  
25 138 adjusted according to gender. Male: < 383 Kcals/ week is a decrease in physical activity, while  
26  
27  
28 139 female: < 270 Kcals/ week is a decrease in physical activity. ④Slowness: Slowness was  
29  
30 140 assessed via walking speed at 15 ft measured for 3 times, and we record the minimum value. The  
31  
32  
33 141 criterion is adjusted according to gender and height. Men: height≤173 cm and time≥7 seconds;  
34  
35 142 height > 173 cm and time ≥ 6 seconds. Women: height≤159 cm and time≥7 seconds ;height  
36  
37  
38 143 >159 cm and time ≥ 6 seconds. ⑤Weakness: Weakness was assessed by grip strength using a  
39  
40  
41 144 handgrip dynamometer was measured for 3 times, and we record the maximum value, adjusted  
42  
43 145 for gender and BMI. Men: BMI ≤ 24 and grip strength ≤ 29;BMI 24.1-26 and grip strength ≤  
44  
45 146 30;BMI 26.1-28 and grip strength ≤ 30;BMI > 28 and grip strength ≤ 32.Women: BMI ≤ 23  
46  
47  
48 147 and grip strength ≤ 17;BMI 23.1-26 and grip strength ≤ 17.3;BMI 26.1-29 and grip strength ≤  
49  
50  
51 148 18;BMI > 29 and grip strength ≤ 21.

### 149 2.2.2 Dependent variables

150 HRQoL was measured by the health utility value of EQ-5D-5L<sup>37</sup>. The EQ-5D-5L consists of the

7

1  
2  
3  
4 151 EQ-5D-5L descriptive system and the EQ visual analogue scale (EQ-VAS). The EQ-5D-5L  
5  
6  
7 152 descriptive system has five elements (mobility, self-care, usual activities, pain/discomfort, and  
8  
9 153 anxiety/depression) and each element includes five level (no problems, some problems, moderate  
10  
11  
12 154 problems, severe problems and extreme problems). The latest EQ-5D -5L health utility scores  
13  
14 155 method refers to Chinese integral conversion table<sup>37</sup>. The range of utility value is [-0.391, 1.000].  
15  
16  
17 156 A higher score indicates better health condition of the respondents. The Cronbach's coefficient  
18  
19  
20 157 was 0.761 in this study.

### 21 22 158 **2.2.3 Mediator**

23  
24 159 Physical disability was evaluated by the Activity of Daily Living Scale (ADLS), which was  
25  
26  
27 160 developed by Lawton and Brody in 1969 to measure the disability of the older adults<sup>38 39</sup>. The  
28  
29  
30 161 Scale consists of 14 items, including Physical Self-Maintenance Scale (PSMS) and Instrumental  
31  
32  
33 162 Activities of Daily Living (IADL). The total score is 14-56, with higher scores indicating  
34  
35  
36 163 increased physical disability. A score of 14 and lower indicates completely normal physical  
37  
38  
39 164 ability, a score between 15 and 22 is defined as mild disability, and a score of 23 and higher is  
40  
41  
42 165 defined as severe disability. ADLS is recommended by WHO and has been widely used in older  
43  
44  
45 166 adults in China, with good reliability and validity<sup>40</sup>. Cronbach's alpha was 0.764 in this study.

### 46 167 **2.2.4 Moderator**

47  
48 168 PA was assessed using the IPAQ-SF<sup>35 36</sup>. The questionnaire contains 7 questions, 6 of which  
49  
50  
51 169 were about physical activity. The IPAQ-SF investigates the PA of the individuals in the last 7  
52  
53  
54 170 days. The questionnaire involved three types of intensity activities, including vigorous physical  
55  
56 171 activity (VPA =8.0 metabolic equivalent [METs]),

1  
2  
3  
4 172 moderate physical activity (MPA =4.0 METs), and low physical activity (LPA =3.3 METs). PA  
5  
6  
7 173 of each person engaged in a certain intensity per week is the METs value corresponding to that  
8  
9 174 physical activity  $\times$  weekly frequency  $\times$  daily time, and the sum of three PA is the total PA (met-h  
10  
11  
12 175 /week). The greater the overall physical activity value, the higher the physical activity.

### 14 176 **2.3 Data analysis**

17 177 To analyze the data, categorical variables were expressed using frequency and percentages (%)  
18  
19 178 and continuous data were described using mean (standard deviation). Pearson correlation  
20  
21  
22 179 coefficient was used to analyze the correlation among physical frailty, physical disability, and  
23  
24  
25 180 HRQoL. All these analyses were performed using IBM SPSS 24.0 (IBM Corp., Armonk, NY,  
26  
27 181 USA). All regression coefficients were tested by the bias-corrected percentile Bootstrap method.  
28  
29  
30 182 The theoretical model was tested by estimating the 95% confidence interval (CI) for mediation  
31  
32  
33 183 and moderating effects with 5000 sampled with repetition. If the 95% CI did not include 0, it  
34  
35 184 meant that the statistics was significant. The mediation model and moderated mediation model  
36  
37  
38 185 were tested with the PROCESS V3.3 macro for SPSS<sup>41</sup>. In the current study, we selected Model  
39  
40  
41 186 4 and Model 58 to analyze the mediating effect and moderated mediation model. In addition,  
42  
43 187 through t test and ANOVA analysis, we found that HRQoL is related to age and education.  
44  
45  
46 188 Previous studies have also found HRQoL was associated with age and education<sup>42 43</sup>. We  
47  
48 189 controlled age and education in this study. Sampling weights were used in all of the analyses to  
49  
50  
51 190 adjust for the survey design.

### 53 191 **2.4 Patient and public involvement statement**

56 192 This research was done without patient involvement. No patients were involved in developing

1  
2  
3  
4 193 the hypothesis and plans for design of this study either. The results would not be disseminated to  
5  
6 194 study participants or any other individuals or communities.

## 9 195 **2.5 Ethical considerations**

11 196 The study was approved by the Ethics Committee of School of Public Health in Shandong  
13  
14 197 University, P. R. China. The participants have been informed of the purpose and procedures of  
15  
16  
17 198 the study before the investigation. Before the study began, participants had signed written  
18  
19 199 informed consent indicating that they were fully aware of the study procedures.  
20  
21  
22 200

## 25 201 **3. Results**

### 27 202 **3.1 Common method biases**

30 203 We used Harman single factor test to conduct a common method biases test<sup>44</sup>. The results show  
31  
32 204 that there are 12 factors with eigenvalues greater than 1, and the variance explained by the first  
33  
34  
35 205 factor is 17.92%, which is less than 40% of the critical standard, indicating that there are no  
36  
37  
38 206 serious common method biases in this study.

### 40 207 **3.2 Socio-demographic characteristics of the participants**

43 208 There were 3,243 participants, comprising 2,060 (63.5%) women and 1,182 (36.5%) men. The  
44  
45 209 average age was 69.88 (SD=6.10) years, ranging from 60 to 97 years. Of the participants, 25.5%  
46  
47  
48 210 were single. About 72.4% had chronic disease. The majority (81.9%) were empty nest elderly.

### 51 211 **3.3 Bivariate correlations of main variables**

53 212 The mean, standard deviation and correlation coefficient of each variable were shown in Table 1.  
54  
55  
56 213 Physical frailty was positively correlated with physical disability ( $r = 0.330, P < 0.01$ ), physical

1  
2  
3  
4 214 frailty was negatively correlated with HRQoL ( $r = -0.426, P < 0.01$ ) and PA ( $r = -0.299,$   
5  
6  
7 215  $P < 0.01$ ). Physical disability was negatively correlated with HRQoL ( $r = -0.557, P < 0.01$ ) and  
8  
9 216 PA ( $r = -0.184, P < 0.01$ ). PA was positively correlated with HRQoL ( $r = 0.196, p < 0.01$ ).

### 217 **3.4 Mediation effect analysis**

218 Model 4 in the SPSS macro compiled by Hayes 2013<sup>41</sup> was used to test the mediating effect of  
219 physical disability in the relationship between physical frailty and HRQoL under the control  
220 variable of age, education. As shown in Table 2 and Table 3, physical frailty had a significant  
221 predictive effect on quality of life ( $\beta = -0.423, t = -26.031, P < 0.001$ ), and the direct predictive  
222 effect of frailty on quality of life was still significant when the mediating variable physical  
223 disability was added. Meanwhile, physical frailty had a significant positive predictive effect on  
224 physical disability ( $\beta = 0.295, t = 17.729, P < 0.001$ ). Physical disability also has a significant  
225 negative predictive effect on HRQoL ( $\beta = -0.482, t = -32.407, P < 0.001$ ). In addition, the upper  
226 and lower limits of the Bootstrap 95% CI for the direct effect of physical frailty on HRQoL and  
227 the mediating effect of physical disability on physical frailty and HRQoL did not include 0 (Table  
228 3), indicating that the mediating effect was significant. The mediating effect value was -0.143 and  
229 the 95% CI was [-0.175, -0.113], which accounted for 33.71% of the total effect. This shows that  
230 disability plays a partial mediating role in the relationship between physical frailty and HRQoL.

### 231 **3.5 Moderated mediation effect analysis**

232 PROCESS macro method (Model 58) compiled by Hayes (2013)<sup>41</sup> was used to test the  
233 moderated mediation model while controlling for age and education (Table 4 and Table 5). After  
234 PA was put into the model, the interaction term between physical frailty and PA significantly

1  
2  
3  
4 235 predicted physical disability ( $\beta = -0.121, t = -7.058, P < 0.001$ ) (Table 4, Model 1), and the  
5  
6 236 interaction term between physical disability and PA also had a significant predictive effect on  
7  
8  
9 237 HRQoL ( $\beta = 0.116, t = 6.119, P < 0.001$ ) (Table 4, Model 2). These results suggest PA played a  
10  
11 238 moderating role in the relationships between physical frailty and physical disability and between  
12  
13  
14 239 physical disability and HRQoL.

15  
16  
17 240 Simple slope analyses indicated that the significant interaction at 1 SD below the mean and  
18  
19 241 1 SD above the mean of physical activity (See Fig. 2 and Fig. 3). Physical frailty had a significant  
20  
21  
22 242 predictive effect on the disability of individuals with high-level or low-level PA, but the  
23  
24  
25 243 predictive effect of physical frailty on physical disability was stronger for individuals with low-  
26  
27 244 level PA ( $b_{\text{simple}} = 0.370, t = 16.979, P < 0.001$ ) than for individuals with high-level PA, as  
28  
29  
30 245 shown in Fig. 2 ( $b_{\text{simple}} = 0.120, t = 4.322, P < 0.001$ ). Fig. 3 showed that for high levels of PA  
31  
32 246 individuals, the effect of physical disability and physical HRQoL was significant ( $b_{\text{simple}} = -$   
33  
34  
35 247  $0.301, t = -9.159, P < 0.001$ ). However, for low-level of PA individuals, the effect of physical  
36  
37  
38 248 disability and HRQoL was still significant but considerably stronger ( $b_{\text{simple}} = -0.546, t = -$   
39  
40 249  $29.701, P < 0.001$ ). In addition, as the level of physical activity increased, the mediating effect  
41  
42  
43 250 of physical disability on the relationship between physical frailty and HRQoL declined (Table 5).

#### 45 251 **4. Discussion**

46  
47  
48 252 In this study, a moderated mediation model was established with the mediation role of physical  
49  
50  
51 253 disability on the relationship between physical frailty and HRQoL, as well as the role of PA as a  
52  
53 254 moderator in this indirect path between physical frailty and HRQoL. These findings elucidate the  
54  
55  
56 255 potential causes of physical frailty on HRQoL and facilitate the development of targeted

1  
2  
3  
4 256 interventions for individuals so as to improve HRQoL in rural older adults.  
5

6 257 Consistent with previous studies<sup>45 46</sup>, we find that physical frailty negatively affect HRQoL  
7  
8  
9 258 of the older adults. This suggests that as the degree of physical frailty increases, the quality of  
10  
11  
12 259 life in the older adults becomes worse. Although many studies have established a direct  
13  
14 260 relationship between frailty and HRQoL, few have explored the underlying mechanisms of this  
15  
16  
17 261 relationship. Our study demonstrates that the physical disability mediates the physical frailty and  
18  
19  
20 262 HRQoL, with the mediating rate of 33.71%. A study also suggested that physical disability was  
21  
22  
23 263 one of the potential factors underlying the association between frailty and HRQoL, which was  
24  
25 264 similar with our study<sup>47</sup>.

26  
27 265 The current study indicates that physical frailty is associated with disability, which is  
28  
29  
30 266 consistent with a study by Kojuma G<sup>48</sup>. Frail older adults are very vulnerable to adverse health  
31  
32  
33 267 effects. A study indicated the risk of disability in the frail older adults was 12- to 13-fold  
34  
35 268 increased than that in the non-frail older adults<sup>49</sup>. Meanwhile, this study also demonstrates that  
36  
37  
38 269 the negative predictive effect of disability on individual HRQoL, which was consistent with  
39  
40  
41 270 previous studies<sup>50 51</sup>. The possible explanation is that disabled older adults' poor self-care ability  
42  
43 271 deteriorates their health, such as their normal physiological activities are restricted, physiological  
44  
45  
46 272 function is declined, social interaction is reduced, and ultimately affect the HRQoL. One study  
47  
48 273 found that disability was the most important health problem for the older adults, which seriously  
49  
50  
51 274 affected their quality of life in old adults' later years<sup>52</sup>. The disability was the most important  
52  
53  
54 275 factor that contributed to decreasing quality of life in the older adults. Physical disability has  
55  
56 276 been shown to be associated with increased chronic diseases, and premature mortality<sup>53 54</sup>, all of



1  
2  
3  
4 277 which could adversely affect the quality of life of older adults<sup>55</sup>. Therefore, physical frailty may  
5  
6 278 reduce HRQoL of rural older adults by increasing their disability.  
7  
8

9 279 In the present study, we also find that PA plays a moderating role in the indirect effect  
10  
11 280 between physical frailty and HRQoL. A larger indirect effect is observed among rural older  
12  
13 281 adults with low-level of PA than among those with average or high-level of PA. Specifically, PA  
14  
15 282 moderates the relationship between physical frailty and physical disability, and between physical  
16  
17 283 disability and HRQoL. For older adults with low-level PA, the impact of physical frailty on  
18  
19 284 physical disability is stronger than older adults with high-level PA. This finding indicates that  
20  
21 285 PA moderates the relation between physical frailty and physical disability. We speculate that the  
22  
23 286 older adults with low-level PA may have a decline in their physiological system reserves, leading  
24  
25 287 to a deterioration of their functional status and ultimately increasing the possibility of physical  
26  
27 288 frailty and disability<sup>56</sup>. A systematic review showed that older adults without exercise habits  
28  
29 289 were at greater risk of developing frailty. Taichi, resistance sports and other physical activities  
30  
31 290 could effectively improve the health of the older adults, reduce the symptoms of physical  
32  
33 291 weakness, and prevent the occurrence of physical disability<sup>57</sup>. Compared with the older adults  
34  
35 292 with high-level PA, the older adults with low-level PA are more vulnerable to the negative  
36  
37 293 effects of physical frailty. As a result, physical frailty may cause more interference in older  
38  
39 294 adults with low-level PA and increase the risk of physical disability.  
40  
41  
42  
43  
44  
45  
46  
47  
48  
49

50 295 We also find that physical disability has a significant impact on quality of life at both high  
51  
52 296 and low-level of PA. Compared with older adults with high levels of PA, physical disability is  
53  
54 297 more likely to adversely affect HRQoL of older adults with low-level PA. A study showed that  
55  
56  
57  
58  
59  
60

1  
2  
3  
4 298 low-level PA was a major contributing factor for older adults disability<sup>58</sup>. As the level of  
5  
6 299 disability increases, the individuals with low-level of PA experience a more serious functional  
7  
8  
9 300 decline and become more worried about the health status, thus further negatively affect the  
10  
11 301 HRQoL<sup>59</sup>. In addition, physical disability has a greater effect on individuals with low-level PA  
12  
13  
14 302 than high-level PA, which indicates that PA plays a moderating role between physical disability  
15  
16  
17 303 and HRQoL. One study found that PA could improve the physical function and daily life  
18  
19 304 activities of disabled older adults, and ultimately improved the life of older adults quality<sup>60</sup>.  
20  
21  
22 305 Therefore, a low-level of PA might be associated with poor quality of life in rural older adults  
23  
24  
25 306 with high disability.

26  
27 307       Based on our findings, we recommended that community health managers should enhance  
28  
29 308 screening and assessment of frailty in rural older adults. The older adults who are frail or pre-  
30  
31 309 frail should be intervened in time, and the older adults who are disabled should be given special  
32  
33 310 attention. Targeted and individualized intervention programs should be designed according to the  
34  
35 311 different characteristics of the stages of frailty and disability. Besides, rural communities should  
36  
37 312 establish some public facilities or organize some public activities to encourage the older adults to  
38  
39 313 participate in sports activities.

40  
41 314       There are several limitations in this study. First, our study was based on a cross-sectional  
42  
43 315 study, which could not provide strong evidence of causation. Future research could adopt a  
44  
45 316 longitudinal design or experiments to explore the causal relationship between physical frailty and  
46  
47 317 HRQoL. Secondly, the data in this study come from the participants' self-report information,  
48  
49 318 which might result in recall bias. Thirdly, physical disability has a partly mediating effect on the  
50  
51  
52  
53  
54  
55  
56  
57  
58  
59  
60

1  
2  
3  
4 319 relationship between physical frailty and HRQoL, which indicates that there are other mediating  
5  
6 320 variables in this relationship. More potential mechanisms related to physical frailty and HRQoL  
7  
8  
9 321 among the older adults need to be explored in the future.  
10  
11  
12 322

### 13 14 323 **Conclusion**

15  
16  
17 324 This study shows that physical frailty is related to HRQoL, and physical disability mediates the  
18  
19 325 relationship between physical frailty and HRQoL, and PA moderates the mediating relationship.  
20  
21  
22 326 A greater effect is observed among rural older adults with low-level of PA than that among those  
23  
24  
25 327 with high-level of PA. This will help to elucidate the underlying mechanism of the relationship  
26  
27 328 between physical frailty and HRQoL and form an effective way to improve the HRQoL of the  
28  
29  
30 329 older adults in rural areas.  
31  
32  
33 330

### 34 35 331 **Acknowledgements**

36  
37  
38 332 We thank the officials of health agencies, all participants and staffs at the study sites for their  
39  
40  
41 333 cooperation.

### 42 334 **Contributors**

43  
44 335 Study concept and design: Chengchao Zhou and Wenting Hao. Acquisition of data: Dan Zhao,  
45  
46 336 Caiting Yu and Yemin Yuan. Analysis and interpretation of data: Peipei Fu, Zhengyue Jing and  
47  
48  
49 337 Yi Wang. Drafting of the manuscript: Wenting Hao. Critical revision of the manuscript for  
50  
51 338 important intellectual content: Chengchao Zhou and Jie Li. All authors read and approved the  
52  
53  
54 339 final manuscript.  
55  
56  
57  
58  
59  
60

## 340 **Funding**

341 This study was supported by the National Natural Science Foundation of China (71774104,  
342 71473152, 71974117), the China Medical Board (16-257), Cheeloo Youth Scholar Grant,  
343 Shandong University (IFYT1810,2012DX006) and NHC Key Laboratory of Health Economics  
344 and Policy Research(NHC-HEPR2019014).

## 345 **Data availability statement**

346 The data that support the findings of this study are available from the corresponding author upon  
347 reasonable request.

## 348 **Competing interests**

349 None declared.

## 350 **Patient consent for publication**

351 Not required.

352

## 353 **REFERENCES**

- 354 1. NBSC. Statistical communiqué of the People's Republic of China on the 2017 national economic and social  
355 development. 2017 [updated February 28,2018. Available from:  
356 [http://www.stats.gov.cn/english/PressRelease/201802/t20180228\\_1585666.html](http://www.stats.gov.cn/english/PressRelease/201802/t20180228_1585666.html).
- 357 2. United Nations DESA, Population Division. World Population Ageing 2017:Highlights 2017 [updated 2017.  
358 Available  
359 from:[https://www.un.org/en/development/desa/population/publications/pdf/ageing/WPA2017\\_Highlights.pdf](https://www.un.org/en/development/desa/population/publications/pdf/ageing/WPA2017_Highlights.pdf).
- 360 3. Brown DS, Thompson WW, Zack MM, et al. Associations Between Health-Related Quality of Life and Mortality in  
361 Older Adults. *Prevention Science* 2015;16(1):21-30. doi: 10.1007/s11121-013-0437-z
- 362 4. Zhou B, Chen K, Wang J, et al. Quality of Life and Related Factors in the Older Rural and Urban Chinese Populations  
363 in Zhejiang Province. *J Appl Gerontol* 2011;30(2):199-225. doi: 10.1177/0733464810361346
- 364 5. Zhou Z, Zhou Z, Gao J, et al. Urban-rural difference in the associations between living arrangements and the health-  
365 related quality of life (HRQOL) of the elderly in China-Evidence from Shaanxi province. *PLoS One*  
366 2018;13(9):e0204118. doi: 10.1371/journal.pone.0204118 [published Online First: 2018/09/21]

- 1  
2  
3 368 6. Morley JE, Vellas B, Van Kan GA, et al. Frailty Consensus: A Call to Action. *J Am Med Dir Assoc* 2013;14(6):392-97.  
4 369 doi: 10.1016/j.jamda.2013.03.022
- 5  
6 370 7. Collard RM, Boter H, Schoevers RA, et al. Prevalence of frailty in community-dwelling older persons: a systematic  
7 371 review. *J Am Geriatr Soc* 2012;60(8):1487-92. doi: 10.1111/j.1532-5415.2012.04054.x [published Online  
8 372 First: 2012/08/14]
- 9  
10 373 8. Vermeiren S, Vellaazzopardi R, Beckwee D, et al. Frailty and the Prediction of Negative Health Outcomes: A Meta-  
11 374 Analysis. *J Am Med Dir Assoc* 2016;17(12) doi: 10.1016/j.jamda.2016.09.010
- 12 375 9. Fried LP, Ferrucci L, Darer JD, et al. Untangling the Concepts of Disability, Frailty, and Comorbidity: Implications  
13 376 for Improved Targeting and Care. *J Gerontol A Biol Sci Med Sci* 2004;59(3):255-63. doi:  
14 377 10.1093/gerona/59.3.M255
- 15  
16 378 10. Lee IC, Chiu YH, Lee CY. Exploration of the importance of geriatric frailty on health-related quality of life.  
17 379 *Psychogeriatrics* 2016;16(6):368-75. doi: 10.1111/psyg.12179 [published Online First: 2016/01/13]
- 18  
19 380 11. Kanauchi M, Kubo A, Kanauchi K, et al. Frailty, health-related quality of life and mental well-being in older adults  
20 381 with cardiometabolic risk factors. *Int J Clin Pract* 2008;62(9):1447-51. doi: 10.1111/j.1742-  
21 382 1241.2008.01830.x [published Online First: 2008/07/23]
- 22  
23 383 12. Fullertonthomson E, Yu B, Nurujeter A, et al. Basic ADL Disability and Functional Limitation Rates Among Older  
24 384 Americans From 2000–2005: The End of the Decline? *J Gerontol A Biol Sci Med Sci* 2009;64(12):1333-36.  
25 385 doi: 10.1093/gerona/glp130
- 26  
27 386 13. Picavet HJ, Hoeymans N. Physical disability in The Netherlands: Prevalence, risk groups and time trends. *Public*  
28 387 *Health* 2002;116(4):231-37. doi: 10.1038/sj.ph.1900864
- 29  
30 388 14. Evenhuis HM, Hermans H, Hilgenkamp TIM, et al. Frailty and Disability in Older Adults with Intellectual Disabilities:  
31 389 Results from the Healthy Ageing and Intellectual Disability Study. *J Am Geriatr Soc* 2012;60(5):934-38. doi:  
32 390 10.1111/j.1532-5415.2012.03925.x
- 33  
34 391 15. Dent E, Chapman I, Howell S, et al. Frailty and functional decline indices predict poor outcomes in hospitalised  
35 392 older people. *Age Ageing* 2014;43(4):477-84. doi: 10.1093/ageing/aft181
- 36  
37 393 16. Papachristou E, Wannamethee SG, Lennon LT, et al. Ability of Self-Reported Frailty Components to Predict  
38 394 Incident Disability, Falls, and All-Cause Mortality: Results From a Population-Based Study of Older British  
39 395 Men. *J Am Med Dir Assoc* 2017;18(2):152-57. doi: 10.1016/j.jamda.2016.08.020 [published Online First:  
40 396 2016/10/16]
- 41  
42 397 17. Bandeen-Roche K, Seplaki CL, Huang J, et al. Frailty in Older Adults: A Nationally Representative Profile in the  
43 398 United States. *J Gerontol A Biol Sci Med Sci* 2015;70(11):1427-34. doi: 10.1093/gerona/glv133 [published  
44 399 Online First: 2015/08/25]
- 45  
46 400 18. Makizako H, Shimada H, Doi T, et al. Impact of physical frailty on disability in community-dwelling older adults: a  
47 401 prospective cohort study. *BMJ open* 2015;5(9):e008462. doi: 10.1136/bmjopen-2015-008462 [published  
48 402 Online First: 2015/09/05]
- 49  
50 403 19. Medhi GK, Sarma J, Pala S, et al. Association between health related quality of life (HRQOL) and activity of daily  
51 404 living (ADL) among elderly in an urban setting of Assam, India. *J Family Med Prim Care* 2019;8(5):1760-64.  
52 405 doi: 10.4103/jfmpc.jfmpc\_270\_19 [published Online First: 2019/06/15]
- 53  
54 406 20. Tavassoli N, Guyonnet S, Abellan Van Kan G, et al. Description of 1,108 older patients referred by their physician  
55 407 to the "Geriatric Frailty Clinic (G.F.C) for Assessment of Frailty and Prevention of Disability" at the  
56  
57  
58  
59  
60

- 1  
2  
3 408 gerontopole. *J Nutr Health Aging* 2014;18(5):457-64. doi: 10.1007/s12603-014-0462-z [published Online  
4 409 First: 2014/06/03]
- 6 410 21. Viña J, Salvador-Pascual A, Tarazona-Santabalbina FJ, et al. Exercise training as a drug to treat age associated  
7 411 frailty. *Free Radic Biol Med* 2016;98:159-64. doi: 10.1016/j.freeradbiomed.2016.03.024 [published Online  
8 412 First: 2016/03/30]
- 10 413 22. Rector JL, Marceau K, Friedman EM. Moderation of the Association Between Chronic Medical Conditions and  
11 414 Functional Limitations Over Time by Physical Activity: Effects of Age. *J Gerontol A Biol Sci Med Sci*  
12 415 2020;75(1):168-74. doi: 10.1093/gerona/glz020 [published Online First: 2019/02/21]
- 14 416 23. Palmer RF, Espino DV, Dergance JM, et al. The role of physical activity and diabetes status as a moderator:  
15 417 functional disability among older Mexican Americans. *Age Ageing* 2012;41(6):752-8. doi:  
16 418 10.1093/ageing/afs106 [published Online First: 2012/10/12]
- 18 419 24. Keysor JJ. Does late-life physical activity or exercise prevent or minimize disablement? A critical review of the  
19 420 scientific evidence. *Am J Prev Med* 2003;25(3 Suppl 2):129-36. doi: 10.1016/s0749-3797(03)00176-4  
20 421 [published Online First: 2003/10/14]
- 22 422 25. Keysor JJ, Jette AM. Have we oversold the benefit of late-life exercise? *J Gerontol A Biol Sci Med Sci*  
23 423 2001;56(7):M412-23. doi: 10.1093/gerona/56.7.m412 [published Online First: 2001/07/11]
- 24 424 26. Rejeski WJ, Mihalko SL. Physical Activity and Quality of Life in Older Adults. *J Gerontol A Biol Sci Med Sci*  
25 425 2001;56(suppl\_2):23-35. doi: 10.1093/gerona/56.suppl\_2.23
- 27 426 27. Casas-Herrero A, Izquierdo M. Physical exercise as an efficient intervention in frail elderly persons. *An Sist Sanit*  
28 427 *Navar* 2012;35(1):69-85. doi: 10.4321/s1137-66272012000100007 [published Online First: 2012/05/04]
- 29 428 28. Mañas A, Del Pozo-Cruz B, Guadalupe-Grau A, et al. Reallocating Accelerometer-Assessed Sedentary Time to  
30 429 Light or Moderate- to Vigorous-Intensity Physical Activity Reduces Frailty Levels in Older Adults: An  
31 430 Isotemporal Substitution Approach in the TSHA Study. *J Am Med Dir Assoc* 2018;19(2):185.e1-85.e6. doi:  
32 431 10.1016/j.jamda.2017.11.003 [published Online First: 2017/12/23]
- 34 432 29. Barnett A, Smith B, Lord SR, et al. Community-based group exercise improves balance and reduces falls in at-risk  
35 433 older people: a randomised controlled trial. *Age Ageing* 2003;32(4):407-14. doi: 10.1093/ageing/32.4.407  
36 434 [published Online First: 2003/07/10]
- 38 435 30. Jing Z, Li J, Wang Y, et al. The mediating effect of psychological distress on cognitive function and physical frailty  
39 436 among the elderly: Evidence from rural Shandong, China. *J Affect Disord* 2020;268:88-94. doi:  
40 437 10.1016/j.jad.2020.03.012 [published Online First: 2020/03/12]
- 42 438 31. Fried LP, Tangen CM, Walston J, et al. Frailty in older adults: evidence for a phenotype. *J Gerontol A Biol Sci Med*  
43 439 *Sci* 2001;56(3):M146-56. doi: 10.1093/gerona/56.3.m146 [published Online First: 2001/03/17]
- 45 440 32. Buta BJ, Walston JD, Godino JG, et al. Frailty assessment instruments: Systematic characterization of the uses  
46 441 and contexts of highly-cited instruments. *Ageing Res Rev* 2016;26:53-61. doi: 10.1016/j.arr.2015.12.003  
47 442 [published Online First: 2015/12/18]
- 49 443 33. Bouillon K, Kivimaki M, Hamer M, et al. Measures of frailty in population-based studies: an overview. *BMC Geriatr*  
50 444 2013;13:64. doi: 10.1186/1471-2318-13-64 [published Online First: 2013/06/22]
- 51 445 34. Radloff LS. The CES-D Scale A Self-Report Depression Scale for Research in the General Population. *Appl Psychol*  
52 446 *Meas* 1977;1(3):385-401. doi: 10.1177/014662167700100306

- 1  
2  
3 447 35. Fan M, Lyu J, He P. Chinese guidelines for data processing and analysis concerning the International Physical  
4 448 Activity Questionnaire. *Zhonghua liu xing bing xue za zhi = Zhonghua liuxingbingxue zazhi* 2014;35(8):961-  
5 449 4. [published Online First: 2014/11/08]
- 7 450 36. Macfarlane DJ, Lee CC, Ho EY, et al. Reliability and validity of the Chinese version of IPAQ (short, last 7 days). *J*  
8 451 *Sci Med Sport* 2007;10(1):45-51. doi: 10.1016/j.jsams.2006.05.003 [published Online First: 2006/06/30]
- 10 452 37. Luo N, Liu G, Li M, et al. Estimating an EQ-5D-5L Value Set for China. *Value Health* 2017;20(4):662-69. doi:  
11 453 10.1016/j.jval.2016.11.016 [published Online First: 2017/04/15]
- 12 454 38. Lawton MP, Brody EM. Assessment of older people: self-maintaining and instrumental activities of daily living.  
13 455 *The Gerontologist* 1969;9(3):179-86. doi: 10.1093/geront/9.3\_Part\_1.179 [published Online First:  
14 456 1969/01/01]
- 16 457 39. Lawton MP. The functional assessment of elderly people. *J Am Geriatr Soc* 1971;19(6):465-81. doi:  
17 458 10.1111/j.1532-5415.1971.tb01206.x [published Online First: 1971/06/01]
- 19 459 40. Chen P, Yu ES, Zhang M, et al. ADL dependence and medical conditions in Chinese older persons: a population-  
20 460 based survey in Shanghai, China. *J Am Geriatr Soc* 1995;43(4):378-83. doi: 10.1111/j.1532-  
21 461 5415.1995.tb05811.x [published Online First: 1995/04/01]
- 23 462 41. Bolin JH. Hayes, Andrew F. (2013). Introduction to Mediation, Moderation, and Conditional Process Analysis: A  
24 463 Regression-Based Approach. New York, NY: The Guilford Press. *J Educ Meas* 2014;51(3):335-37. doi:  
25 464 10.1111/jedm.12050
- 27 465 42. Bao XY, Xie YX, Zhang XX, et al. The association between multimorbidity and health-related quality of life: a cross-  
28 466 sectional survey among community middle-aged and elderly residents in southern China. *Health Qual Life*  
29 467 *Outcomes* 2019;17(1):107. doi: 10.1186/s12955-019-1175-0 [published Online First: 2019/06/27]
- 31 468 43. Chapman B, Duberstein P, Lyness JM. Personality traits, education, and health-related quality of life among older  
32 469 adult primary care patients. *J Gerontol B Psychol Sci Soc Sci* 2007;62(6):P343-52. doi:  
33 470 10.1093/geronb/62.6.p343 [published Online First: 2007/12/15]
- 34 471 44. Podsakoff PM, MacKenzie SB, Lee JY, et al. Common method biases in behavioral research: a critical review of  
35 472 the literature and recommended remedies. *J Appl Psychol* 2003;88(5):879-903. doi: 10.1037/0021-  
36 473 9010.88.5.879 [published Online First: 2003/10/01]
- 38 474 45. Kanwar A, Singh M, Lennon R, et al. Frailty and health-related quality of life among residents of long-term care  
39 475 facilities. *J Aging Health* 2013;25(5):792-802. doi: 10.1177/0898264313493003 [published Online First:  
40 476 2013/06/27]
- 42 477 46. Mulasso A, Roppolo M, Rabaglietti E. The role of individual characteristics and physical frailty on health related  
43 478 quality of life (HRQOL): a cross sectional study of Italian community-dwelling older adults. *Arch Gerontol*  
44 479 *Geriatr* 2014;59(3):542-8. doi: 10.1016/j.archger.2014.08.012 [published Online First: 2014/09/14]
- 46 480 47. Huaxue L, Taifang L, Wenjing Y, et al. Status of frailty and its effect path on quality of life among the elderly in  
47 481 community. *Chinese Nursing Research* 2019;33(21):3645-49.
- 49 482 48. Kojima G. Frailty as a predictor of disabilities among community-dwelling older people: a systematic review and  
50 483 meta-analysis. *Disabil Rehabil* 2017;39(19):1897-908. doi: 10.1080/09638288.2016.1212282 [published  
51 484 Online First: 2016/08/26]
- 53 485 49. Feng L, Zin Nyunt MS, Gao Q, et al. Cognitive Frailty and Adverse Health Outcomes: Findings From the Singapore  
54 486 Longitudinal Ageing Studies (SLAS). *J Am Med Dir Assoc* 2017;18(3):252-58. doi:  
55 487 10.1016/j.jamda.2016.09.015 [published Online First: 2016/11/14]

- 1  
2  
3 488 50. Akosile CO, Mgbeojedo UG, Maruf FA, et al. Depression, functional disability and quality of life among Nigerian  
4 489 older adults: Prevalences and relationships. *Arch Gerontol Geriatr* 2018;74:39-43. doi:  
5 490 10.1016/j.archger.2017.08.011 [published Online First: 2017/09/28]  
6  
7 491 51. Shin KR, Byeon YS, Kang Y, et al. A study on physical symptom, activity of daily living, and health-related quality  
8 492 of life (HRQoL) in the community-dwelling older adults. *Taehan Kanho Hakhoe chi* 2008;38(3):437-44. doi:  
9 493 10.4040/jkan.2008.38.3.437 [published Online First: 2008/07/08]  
10  
11 494 52. Crimmins EM. Trends in the health of the elderly. *Annu Rev Public Health* 2004;25:79-98. doi:  
12 495 10.1146/annurev.publhealth.25.102802.124401 [published Online First: 2004/03/16]  
13  
14 496 53. Khan ZA, Singh C, Khan T. Correlates of physical disability in the elderly population of Rural North India (Haryana).  
15 497 *J Family Community Med* 2018;25(3):199-204. doi: 10.4103/jfcm.JFCM\_160\_17 [published Online First:  
16 498 2018/09/18]  
17  
18 499 54. Wei M, Li J, Wang H. Impact of the disability trajectory on the mortality risk of older adults in China. *Arch Gerontol*  
19 500 *Geriatr* 2018;74:174-83. doi: 10.1016/j.archger.2017.10.015 [published Online First: 2017/11/11]  
20 501 55. Gobbens RJ. Associations of ADL and IADL disability with physical and mental dimensions of quality of life in  
21 502 people aged 75 years and older. *PeerJ* 2018;6:e5425. doi: 10.7717/peerj.5425 [published Online First:  
22 503 2018/08/21]  
23  
24 504 56. Rejeski WJ, Brawley LR, Haskell WL. The prevention challenge: an overview of this supplement. *Am J Prev Med*  
25 505 2003;25(3 Suppl 2):107-9. doi: 10.1016/s0749-3797(03)00173-9 [published Online First: 2003/10/14]  
26  
27 506 57. de Labra C, Guimaraes-Pinheiro C, Maseda A, et al. Effects of physical exercise interventions in frail older adults:  
28 507 a systematic review of randomized controlled trials. *BMC Geriatr* 2015;15:154. doi: 10.1186/s12877-015-  
29 508 0155-4 [published Online First: 2015/12/03]  
30  
31 509 58. Kortebein P, Ferrando A, Lombeida J, et al. Effect of 10 days of bed rest on skeletal muscle in healthy older adults.  
32 510 *JAMA* 2007;297(16):1772-4. doi: 10.1001/jama.297.16.1772-b [published Online First: 2007/04/26]  
33 511 59. Ávila-Funes JA, Pina-Escudero SD, Aguilar-Navarro S, et al. Cognitive impairment and low physical activity are the  
34 512 components of frailty more strongly associated with disability. *J Nutr Health Aging* 2011;15(8):683-9. doi:  
35 513 10.1007/s12603-011-0111-8 [published Online First: 2011/10/05]  
36  
37 514 60. Villareal DT, Chode S, Parimi N, et al. Weight loss, exercise, or both and physical function in obese older adults.  
38 515 *N Engl J Med* 2011;364(13):1218-29. doi: 10.1056/NEJMoa1008234 [published Online First: 2011/04/01]  
39 516  
40  
41 517  
42 518  
43  
44 519  
45 520  
46 521  
47 522  
48 523  
49 524  
50 525  
51 526  
52 527  
53 528  
54  
55  
56  
57  
58  
59  
60



**Table 1 Correlations coefficients of main variables among the participants in Shandong, China, 2019 (N=3243)**

| Variable              | M        | SD       | 1         | 2         | 3        | 4 |
|-----------------------|----------|----------|-----------|-----------|----------|---|
| 1.Physical frailty    | 1.511    | 1.071    | 1         |           |          |   |
| 2.Physical disability | 16.994   | 4.366    | 0.330***  | 1         |          |   |
| 3.Physical activity   | 3122.346 | 3157.705 | -0.299*** | -0.184*** | 1        |   |
| 4.HRQoL               | 0.896    | 0.161    | -0.426*** | -0.557*** | 0.196*** | 1 |

M mean, SD standard deviation

\*\*\* $P < 0.001$

**Table 2 Testing the mediation effect of physical disability between physical frailty and HRQoL among the participants in Shandong, China, 2019**

| Predictors          | Model1(HRQoL) |            | Model2(Physical disability ) |           | Model3(HQRoL) |            |
|---------------------|---------------|------------|------------------------------|-----------|---------------|------------|
|                     | $\beta$       | t          | $\beta$                      | t         | $\beta$       | t          |
| Age                 | -0.018        | -0.731     | 0.166                        | 6.349***  | 0.061         | 2.758**    |
| Education           | 0.010         | 0.162      | -0.182                       | -8.326*** | -0.084        | -4.507***  |
| Physical frailty    | -0.423        | -26.031*** | 0.295                        | 17.729*** | -0.280        | -18.957*** |
| Physical disability |               |            |                              |           | -0.482        | -32.407*** |
| R <sup>2</sup>      | 0.181         |            | 0.141                        |           | 0.381         |            |
| F                   | 238.859***    |            | 176.932***                   |           | 499.748***    |            |

\*\* $P < 0.01$ , \*\*\* $P < 0.001$

**Table 3 Total effect, direct effect and mediation effect**

|                         | Effect size | BootSE | BootCI |        | Relative effect value |
|-------------------------|-------------|--------|--------|--------|-----------------------|
|                         |             |        | Low    | High   |                       |
| <b>Total effect</b>     | -0.423      | 0.020  | -0.461 | -0.382 |                       |
| <b>Direct effect</b>    | -0.280      | 0.017  | -0.313 | -0.247 | 66.29%                |
| <b>Mediation effect</b> | -0.143      | 0.016  | -0.175 | -0.113 | 33.71%                |

BootSE bootstrap standard error, BootCI bootstrap confidence interval

**Table 4 Testing the moderated mediation effect of physical frailty on HRQoL among the participants in Shandong, China, 2019**

| Predictors                      | Model 1(Physical disability) |            | Model 2(HRQoL) |            |
|---------------------------------|------------------------------|------------|----------------|------------|
|                                 | $\beta$                      | t          | $\beta$        | t          |
| Age                             | 0.154                        | 5.956***   | 0.062          | 2.765**    |
| Education                       | -0.181                       | -8.393***  | -0.073         | -3.849***  |
| Physical frailty                | 0.246                        | 13.965***  | -0.260         | -17.070*** |
| Physical activity               | -0.104                       | -5.555***  | 0.091          | 4.673***   |
| Physical frailty $\times$ PA    | -0.120                       | -7.058***  |                |            |
| Physical disability             |                              |            | -0.421         | -24.364*** |
| Physical disability $\times$ PA |                              |            | 0.116          | 6.119***   |
| R2                              |                              | 0.159      |                | 0.390      |
| F                               |                              | 122.004*** |                | 345.138*** |

\*\*  $P < 0.01$ , \*\*\*  $P < 0.001$

**Table 5 Mediating effect values at different levels of physical activity among the participants in Shandong, China, 2019**

| Physical activity | Effect | BootSE | BootLLCI | BootULCI |
|-------------------|--------|--------|----------|----------|
| M-1SD             | -0.209 | 0.023  | -0.250   | -0.160   |
| M                 | -0.104 | 0.013  | -0.132   | -0.080   |
| M+1SD             | -0.040 | 0.012  | -0.062   | -0.017   |

M mean, 1SD one standard deviation, BootSE bootstrap standard error, BootLLCI bootstrap lower limit confidence interval, BootULCI bootstrap upper limit confidence interval

**Fig. 1** The conceptual framework of the moderated mediation mode

**Fig. 2** Simple slope analysis shows that physical frailty moderated the relation between physical frailty and HRQoL

**Fig.3** Simple slope analysis shows that physical activity moderated the relation between physical disability and HRQoL

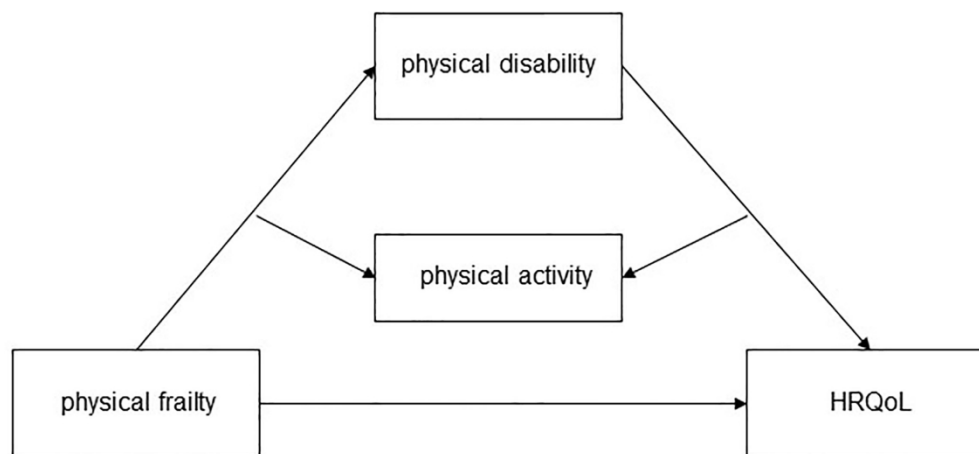

Fig. 1 The conceptual framework of the moderated mediation mode

197x90mm (300 x 300 DPI)

1  
2  
3  
4  
5  
6  
7  
8  
9  
10  
11  
12  
13  
14  
15  
16  
17  
18  
19  
20  
21  
22  
23  
24  
25  
26  
27  
28  
29  
30  
31  
32  
33  
34  
35  
36  
37  
38  
39  
40  
41  
42  
43  
44  
45  
46  
47  
48  
49  
50  
51  
52  
53  
54  
55  
56  
57  
58  
59  
60

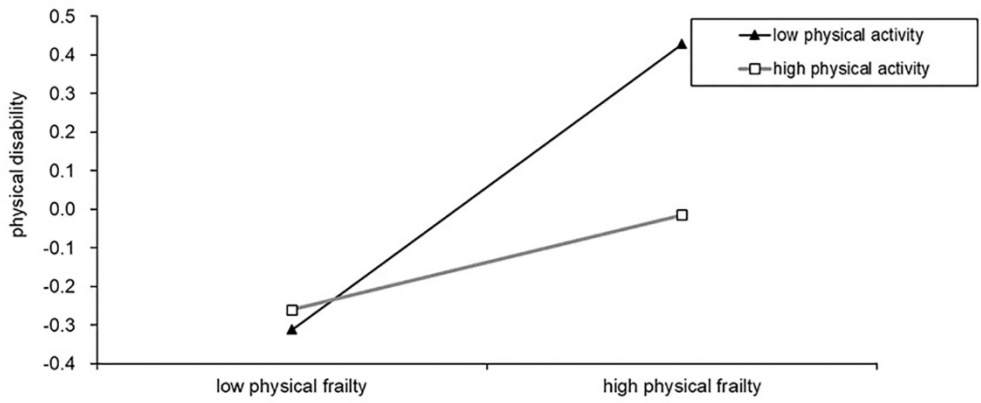

Fig. 2 Simple slope analysis shows that physical frailty moderated the relation between physical frailty and HRQoL

210x90mm (300 x 300 DPI)

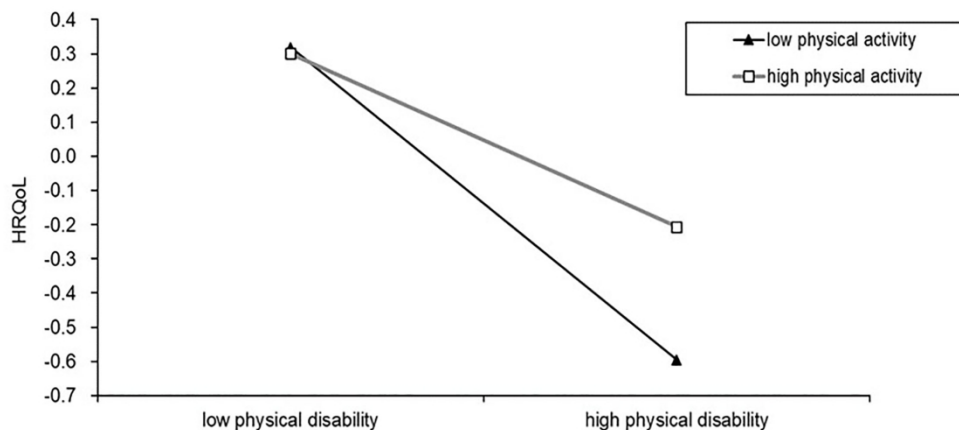

Fig.3 Simple slope analysis shows that physical activity moderated the relation between physical disability and HRQoL

194x90mm (300 x 300 DPI)

STROBE Statement—Checklist of items that should be included in reports of *cross-sectional studies*

|                           | Item No | Recommendation                                                                                                                                                                                    | Page No |
|---------------------------|---------|---------------------------------------------------------------------------------------------------------------------------------------------------------------------------------------------------|---------|
| <b>Title and abstract</b> | 1       | (a) Indicate the study's design with a commonly used term in the title or the abstract                                                                                                            | P2      |
|                           |         | (b) Provide in the abstract an informative and balanced summary of what was done and what was found                                                                                               | P2      |
| <b>Introduction</b>       |         |                                                                                                                                                                                                   |         |
| Background/rationale      | 2       | Explain the scientific background and rationale for the investigation being reported                                                                                                              | P4-P5   |
| Objectives                | 3       | State specific objectives, including any prespecified hypotheses                                                                                                                                  | P5-P6   |
| <b>Methods</b>            |         |                                                                                                                                                                                                   |         |
| Study design              | 4       | Present key elements of study design early in the paper                                                                                                                                           | P6      |
| Setting                   | 5       | Describe the setting, locations, and relevant dates, including periods of recruitment, exposure, follow-up, and data collection                                                                   | P6      |
| Participants              | 6       | (a) Give the eligibility criteria, and the sources and methods of selection of participants                                                                                                       | P6      |
| Variables                 | 7       | Clearly define all outcomes, exposures, predictors, potential confounders, and effect modifiers. Give diagnostic criteria, if applicable                                                          | P7      |
| Data sources/measurement  | 8*      | For each variable of interest, give sources of data and details of methods of assessment (measurement). Describe comparability of assessment methods if there is more than one group              | P7      |
| Bias                      | 9       | Describe any efforts to address potential sources of bias                                                                                                                                         | P10     |
| Study size                | 10      | Explain how the study size was arrived at                                                                                                                                                         | P6-P9   |
| Quantitative variables    | 11      | Explain how quantitative variables were handled in the analyses. If applicable, describe which groupings were chosen and why                                                                      | P6-P9   |
| Statistical methods       | 12      | (a) Describe all statistical methods, including those used to control for confounding                                                                                                             | P9      |
|                           |         | (b) Describe any methods used to examine subgroups and interactions                                                                                                                               |         |
|                           |         | (c) Explain how missing data were addressed                                                                                                                                                       |         |
|                           |         | (d) If applicable, describe analytical methods taking account of sampling strategy                                                                                                                | P9      |
|                           |         | (e) Describe any sensitivity analyses                                                                                                                                                             |         |
| <b>Results</b>            |         |                                                                                                                                                                                                   |         |
| Participants              | 13*     | (a) Report numbers of individuals at each stage of study—eg numbers potentially eligible, examined for eligibility, confirmed eligible, included in the study, completing follow-up, and analysed |         |
|                           |         | (b) Give reasons for non-participation at each stage                                                                                                                                              |         |
|                           |         | (c) Consider use of a flow diagram                                                                                                                                                                |         |
| Descriptive data          | 14*     | (a) Give characteristics of study participants (eg demographic, clinical, social) and information on exposures and potential confounders                                                          | P10     |
|                           |         | (b) Indicate number of participants with missing data for each variable of interest                                                                                                               |         |
| Outcome data              | 15*     | Report numbers of outcome events or summary measures                                                                                                                                              | P10-    |

|    |                          |    |                                                                                                                                                                                                              |
|----|--------------------------|----|--------------------------------------------------------------------------------------------------------------------------------------------------------------------------------------------------------------|
| 1  |                          |    |                                                                                                                                                                                                              |
| 2  | Main results             | 16 | (a) Give unadjusted estimates and, if applicable, confounder-adjusted estimates and their precision (eg, 95% confidence interval). Make clear which confounders were adjusted for and why they were included |
| 3  |                          |    |                                                                                                                                                                                                              |
| 4  |                          |    |                                                                                                                                                                                                              |
| 5  |                          |    |                                                                                                                                                                                                              |
| 6  |                          |    | (b) Report category boundaries when continuous variables were categorized                                                                                                                                    |
| 7  |                          |    |                                                                                                                                                                                                              |
| 8  |                          |    | (c) If relevant, consider translating estimates of relative risk into absolute risk for a meaningful time period                                                                                             |
| 9  |                          |    |                                                                                                                                                                                                              |
| 10 |                          |    |                                                                                                                                                                                                              |
| 11 | Other analyses           | 17 | Report other analyses done—eg analyses of subgroups and interactions, and sensitivity analyses                                                                                                               |
| 12 |                          |    |                                                                                                                                                                                                              |
| 13 |                          |    |                                                                                                                                                                                                              |
| 14 | <b>Discussion</b>        |    |                                                                                                                                                                                                              |
| 15 | Key results              | 18 | Summarise key results with reference to study objectives                                                                                                                                                     |
| 16 | Limitations              | 19 | Discuss limitations of the study, taking into account sources of potential bias or imprecision. Discuss both direction and magnitude of any potential bias                                                   |
| 17 |                          |    |                                                                                                                                                                                                              |
| 18 |                          |    |                                                                                                                                                                                                              |
| 19 |                          |    |                                                                                                                                                                                                              |
| 20 | Interpretation           | 20 | Give a cautious overall interpretation of results considering objectives, limitations, multiplicity of analyses, results from similar studies, and other relevant evidence                                   |
| 21 |                          |    |                                                                                                                                                                                                              |
| 22 |                          |    |                                                                                                                                                                                                              |
| 23 |                          |    |                                                                                                                                                                                                              |
| 24 | Generalisability         | 21 | Discuss the generalisability (external validity) of the study results                                                                                                                                        |
| 25 |                          |    |                                                                                                                                                                                                              |
| 26 | <b>Other information</b> |    |                                                                                                                                                                                                              |
| 27 | Funding                  | 22 | Give the source of funding and the role of the funders for the present study and, if applicable, for the original study on which the present article is based                                                |
| 28 |                          |    |                                                                                                                                                                                                              |
| 29 |                          |    |                                                                                                                                                                                                              |
| 30 |                          |    |                                                                                                                                                                                                              |

\*Give information separately for exposed and unexposed groups.

**Note:** An Explanation and Elaboration article discusses each checklist item and gives methodological background and published examples of transparent reporting. The STROBE checklist is best used in conjunction with this article (freely available on the Web sites of PLoS Medicine at <http://www.plosmedicine.org/>, Annals of Internal Medicine at <http://www.annals.org/>, and Epidemiology at <http://www.epidem.com/>). Information on the STROBE Initiative is available at [www.strobe-statement.org](http://www.strobe-statement.org).



# BMJ Open

## Physical frailty and health-related quality of life among Chinese rural older adults: A moderated mediation analysis of physical disability and physical activity

|                                 |                                                                                                                                                                                                                                                                                                                                                                                                                                                                                                                                                                                     |
|---------------------------------|-------------------------------------------------------------------------------------------------------------------------------------------------------------------------------------------------------------------------------------------------------------------------------------------------------------------------------------------------------------------------------------------------------------------------------------------------------------------------------------------------------------------------------------------------------------------------------------|
| Journal:                        | <i>BMJ Open</i>                                                                                                                                                                                                                                                                                                                                                                                                                                                                                                                                                                     |
| Manuscript ID                   | bmjopen-2020-042496.R1                                                                                                                                                                                                                                                                                                                                                                                                                                                                                                                                                              |
| Article Type:                   | Original research                                                                                                                                                                                                                                                                                                                                                                                                                                                                                                                                                                   |
| Date Submitted by the Author:   | 17-Nov-2020                                                                                                                                                                                                                                                                                                                                                                                                                                                                                                                                                                         |
| Complete List of Authors:       | Hao, Wenting; School of public health<br>Li, Jie; Shandong University School of Public Health<br>Fu, Peipei; Shandong University Cheeloo College of Medicine<br>Zhao, Dan; Shandong University, school of public health<br>Jing, Zhengyue; Shandong University Cheeloo College of Medicine<br>wang, yi; Shandong University Cheeloo College of Medicine<br>Yu, Caiting; Shandong University Cheeloo College of Medicine<br>Yuan, Yemin; Shandong University School of Public Health<br>Zhou, Chengchao; Shandong University, School of Public Health;<br>Shandong University, China |
| <b>Primary Subject Heading</b>: | Public health                                                                                                                                                                                                                                                                                                                                                                                                                                                                                                                                                                       |
| Secondary Subject Heading:      | Geriatric medicine                                                                                                                                                                                                                                                                                                                                                                                                                                                                                                                                                                  |
| Keywords:                       | Public health < INFECTIOUS DISEASES, Quality in health care < HEALTH SERVICES ADMINISTRATION & MANAGEMENT, SOCIAL MEDICINE                                                                                                                                                                                                                                                                                                                                                                                                                                                          |
|                                 |                                                                                                                                                                                                                                                                                                                                                                                                                                                                                                                                                                                     |

SCHOLARONE™  
Manuscripts



I, the Submitting Author has the right to grant and does grant on behalf of all authors of the Work (as defined in the below author licence), an exclusive licence and/or a non-exclusive licence for contributions from authors who are: i) UK Crown employees; ii) where BMJ has agreed a CC-BY licence shall apply, and/or iii) in accordance with the terms applicable for US Federal Government officers or employees acting as part of their official duties; on a worldwide, perpetual, irrevocable, royalty-free basis to BMJ Publishing Group Ltd ("BMJ") its licensees and where the relevant Journal is co-owned by BMJ to the co-owners of the Journal, to publish the Work in this journal and any other BMJ products and to exploit all rights, as set out in our [licence](#).

The Submitting Author accepts and understands that any supply made under these terms is made by BMJ to the Submitting Author unless you are acting as an employee on behalf of your employer or a postgraduate student of an affiliated institution which is paying any applicable article publishing charge ("APC") for Open Access articles. Where the Submitting Author wishes to make the Work available on an Open Access basis (and intends to pay the relevant APC), the terms of reuse of such Open Access shall be governed by a Creative Commons licence – details of these licences and which [Creative Commons](#) licence will apply to this Work are set out in our licence referred to above.

Other than as permitted in any relevant BMJ Author's Self Archiving Policies, I confirm this Work has not been accepted for publication elsewhere, is not being considered for publication elsewhere and does not duplicate material already published. I confirm all authors consent to publication of this Work and authorise the granting of this licence.

1  
2  
3  
4 1 **Physical frailty and health-related quality of life among Chinese rural older adults: A**  
5 2 **moderated mediation analysis of physical disability and physical activity**

6  
7 3 Wenting Hao<sup>1</sup>, Jie Li<sup>1</sup>, Peipei Fu<sup>2</sup>, Dan Zhao<sup>1</sup>, Zhengyue Jing<sup>1</sup>, Yi Wang<sup>1</sup>, Caiting Yu<sup>1</sup>, Yemin  
8 4 Yuan<sup>1</sup>, Chengchao Zhou<sup>1,3\*</sup>

9  
10  
11  
12 5  
13  
14 6 <sup>1</sup>Centre for Health Management and Policy Research, School of Public Health, Cheeloo College  
15 7 of Medicine, Shandong University, Jinan, 250012, China

16  
17 8 <sup>2</sup>NHC Key Lab of Health Economics and Policy Research (Shandong University), Jinan, 250012,  
18 9 China

19  
20  
21  
22  
23  
24  
25  
26 12 **Corresponding Author:**

27  
28  
29 13 Chengchao Zhou, M.D., Ph.D., 44 Wen-hua-xi Road, Shandong University, Jinan 250012, China

30  
31  
32 14 Tel: 86-531-88381567 Fax : 86-531-88382553

33  
34 15 E-mail: zhouchengchao@sdu.edu.cn

35  
36  
37 16 Word count:3542

1  
2  
3  
4 255  
6  
7 **Abstract**

8  
9 **Objectives:** The purpose of this study is to explore the mediating effect of physical disability, as  
10  
11 well as the role of physical activity (PA) as a moderator in the relationship between physical  
12  
13 frailty and health-related quality of life (HRQoL) among rural older adults in China.  
14  
15

16  
17 **Design:** Cross-sectional analysis.  
18  
19

20  
21 **Setting:** Rural households in Shandong of China (Rushan, Qufu, Laolin).  
22  
23

24  
25 **Participants and methods:** A survey was conducted among 3,243 rural older adults. The data  
26  
27 were collected using questionnaires measuring physical frailty, physical disability, HRQoL and  
28  
29 PA. Bootstrap analyses were employed to explore the mediating effect of physical disability and  
30  
31 also the moderating role of PA on physical frailty and HRQoL.  
32  
33

34  
35 **Results:** After controlling for age and education, physical disability partially mediated the effect  
36  
37 of physical frailty on HRQoL[indirect effect = -0.143, 95% confidence intervals (CI) = -0.175,  
38  
39 -0.113], with the mediating effect accounting for 33.71% of the total effect. PA moderated the  
40  
41 relationship between physical frailty and physical disability, as well as the relationship between  
42  
43 physical disability and HRQoL. Specifically, the interaction term between physical frailty and  
44  
45 PA significantly predicted physical disability ( $\beta = -0.120$ ,  $t = -7.058$ ,  $P < 0.001$ ), and the  
46  
47 interaction term between physical disability and PA also had a significant predictive effect on  
48  
49 HRQoL ( $\beta = 0.115$ ,  $t = 6.104$ ,  $P < 0.001$ ).  
50  
51  
52  
53  
54  
55  
56  
57  
58  
59  
60

1  
2  
3  
4 44 **Conclusions:** PA can moderate the indirect effect of physical disability on the association  
5  
6 45 between physical frailty and HRQoL. This study helps to understand the mechanism underlying  
7  
8  
9 46 the association between physical frailty and HRQoL. Encouraging rural older adults to increase  
10  
11  
12 47 PA appropriately might improve HRQoL for older adults with physical frailty and physical  
13  
14 48 disability problems.  
15  
16  
17 49  
18  
19  
20 50 **Key words:** HRQoL; Physical activity; Physical frailty; Physical disability; Rural older adults;  
21  
22 51 Moderated mediation analysis  
23  
24  
25 52  
26  
27 53  
28  
29  
30  
31  
32  
33  
34  
35  
36  
37  
38  
39  
40  
41  
42  
43  
44  
45  
46  
47  
48  
49  
50  
51  
52  
53

1  
2  
3  
4 54 **Strengths and limitations of this study**

- 5  
6  
7 55 1. This is the first study to investigate the moderating and mediating factors of the relationship  
8  
9  
10 56 between physical frailty and HRQoL among older adults in rural China.  
11  
12 57 2. Moderated mediation model was used to explore the potential effect of physical disability  
13  
14  
15 58 and physical activity.  
16  
17 59 3. Cross-sectional data could not provide strong evidence of causation.  
18  
19  
20 60 4. Only two control variables were included in this study, and more confounding factors will be  
21  
22  
23 61 included to verify our results in the future.  
24  
25 62 5. More potential mechanisms related to physical frailty and HRQoL among older adults need  
26  
27  
28 63 to be explored by using longitudinal data in the future.  
29  
30  
31 64  
32  
33  
34 65  
35  
36  
37 66  
38  
39 67  
40  
41  
42 68  
43  
44  
45 69  
46  
47 70  
48  
49  
50  
51  
52  
53  
54  
55  
56  
57  
58  
59  
60

## 1. Introduction

Population aging has become a global social problem. As one of the world's most aging countries, China had 249 million people aged over 60 years in 2018, accounting for 17.9 percent of the total population<sup>1</sup>. It is predicted that by 2050, older adults over 60 will account for more than 35.1% of the total population<sup>2</sup>. With the increasing aging population and the extension of life expectancy, improving the health-related quality of life (HRQoL) of older adults is an important public health issue. HRQoL is a predictive factor of mortality in older adults<sup>3</sup>. Compared with urban older adults, the HRQoL of rural older adults is worse<sup>4,5</sup>, which needs more attention.

Physical frailty is a medical syndrome caused by a variety of etiologies and causes, which is characterized by a decline in physical strength, endurance, and decreased physiological function<sup>6</sup>. With the increase of age, the risk of physical frailty increases<sup>7</sup>. Frailty may lead to negative health consequences, including fall, reduced activity, reduced independence, frequent hospitalization, and disability<sup>8</sup>. These adverse outcomes resulted in a decline in the quality of life of older adults. Previous cross-sectional and longitudinal studies have shown that frailty was negatively associated with HRQoL<sup>9-11</sup>, and frail older adults reported worse HRQoL than those who were not frail<sup>12</sup>. Although the association between physical frailty and quality of life has been confirmed, the underlying mechanism remains unclear.

The prevalence of physical disability is high among the frail older adults<sup>13,14</sup>. Some studies showed physical frailty was closely related to disability<sup>15,16</sup>, and might be the precursor and cause

1  
2  
3  
4 90 of disability<sup>17</sup>. A national longitudinal study of 7,439 people over age 65 in US showed that  
5  
6 91 frailty was a strong predictor of disability<sup>18</sup>. A prospective two-year cohort study in Japan also  
7  
8  
9 92 showed that frailty and prophase of frailty increased the risk of disability<sup>19</sup>. These findings  
10  
11  
12 93 suggest that physical frailty is associated with disability in older adults. Studies have also  
13  
14 94 demonstrated that the quality of life worsened as the degree of disability increased, and the more  
15  
16  
17 95 severe the disability, the worse the quality of life<sup>20</sup>. Compared with non-disabled older adults,  
18  
19  
20 96 disabled older adults are more prone to fall, depression, anxiety, etc., and their HRQoL was  
21  
22  
23 97 significantly reduced. Therefore, we speculate that frailty may have an indirect effect on  
24  
25 98 individual's HRQoL through the mediating effect of physical disability.

26  
27 99 Physical frailty is considered to be reversible and preventable<sup>21</sup>. Physical activity (PA) is a  
28  
29  
30 100 key factor of reverse and prevent frailty in older adults<sup>22</sup>. Studies have found that physical  
31  
32  
33 101 activity moderated the relationship between chronic illness and functional limitations, and  
34  
35 102 moderated functional disability and body function<sup>23-24</sup>. PA can alleviate the decline of physical  
36  
37  
38 103 function in older adults and has a beneficial effect on functional limitations, physical frailty,  
39  
40  
41 104 disability and quality of life in older adults<sup>25-27</sup>. Studies indicated the positive effect of physical  
42  
43  
44 105 activity on reducing adverse events caused by frailty in older people. Performing a physical  
45  
46  
47 106 activity of moderate to vigorous intensity would improve physical frailty and prevent the  
48  
49  
50 107 occurrence of disability when compared to the performance of a physical activity of low intensity,  
51  
52  
53 108 ultimately promote older adults' quality of life<sup>28-30</sup>. Therefore, PA may moderate the direct and  
54  
55 109 indirect relationship between physical frailty and HRQoL through physical disability as a



1  
2  
3  
4 110 mediator.

5  
6 111 In the present study, we used a cross-sectional study to the relationship between physical  
7  
8  
9 112 frailty and HRQoL, focusing on the mediating role of physical disability and the moderating role  
10  
11  
12 113 of PA in the relationship between physical frailty and HRQoL. The conceptual framework of the  
13  
14 114 moderated mediation model was shown in Fig. 1.  
15

## 16 17 115 18 19 116 **2. Methods**

### 20 21 22 117 **2.1.1 Design and sample**

23  
24 118 This study was conducted from May to June, 2019 in Shandong province, China. A multistage  
25  
26  
27 119 stratified cluster sampling method was used to select participants, which was described in detail  
28  
29  
30 120 in a paper we have previously published<sup>31</sup>. Three rural counties (Qufu, Laoling and Rushan) were  
31  
32  
33 121 selected according to the GDP per capita (2018) in Shandong. Within each selected county, five  
34  
35 122 townships were randomly selected. Then, four villages were selected from each selected  
36  
37  
38 123 townships and the elderly aged over 60 years old who were randomly selected from sample  
39  
40  
41 124 villages. All participants completed the questionnaire independently. The survey was completed  
42  
43  
44 125 in about an hour, and the investigators checked the questionnaires when the participants returned  
45  
46  
47 126 them. A total of 3,600 respondents were recruited from 60 villages and 15 townships in 3 rural  
48  
49  
50 127 counties in Shandong province, of whom 3,243 completed the entire survey, with a response rate  
51  
52  
53 128 of 90.05%.

### 54 55 56 129 **2.2. Variables and measurement**

## 2.2.1 Independent variable

Physical frailty was measured by Frailty Phenotype<sup>32</sup>. The scale is a widely used frailty screening scale with good reliability and validity<sup>33 34</sup>. Frailty was defined based on the following five aspects: weight loss, exhaustion, low physical activity level, slowness, weakness. ①Weight loss: In the past 1 year, participants' body mass index (BMI) decreased by >5.0% (except for personal deliberate weight loss). ②Exhaustion: Using the Center for Epidemiological Studies-Depression (CES-D)<sup>35</sup>: "How often in the last week did you feel this way?" (1) I could not get going and (2) I felt everything I did was an effort. Either of the above two questions that participants answered 3~4 days and most of the time, was considered exhaustion. ③Low physical activity level: According to the International Physical Activity Questionnaire-short Form (IPAQ-SF)<sup>36 37</sup>, we used standard algorithms to calculate the Kcals consumed per week. The criterion is adjusted according to gender. Male: <383 Kcals/ week is a decrease in physical activity, while female: <270 Kcals/ week is a decrease in physical activity. ④Slowness: Slowness was assessed via walking speed at 15 ft measured for 3 times, and we record the minimum value. The criterion is adjusted according to gender and height. Men: height ≤173 cm and time ≥7 seconds; height >173 cm and time ≥6 seconds. Women: height ≤159 cm and time ≥7 seconds; height >159 cm and time ≥6 seconds. ⑤Weakness: Weakness was assessed by grip strength using a handgrip dynamometer was measured for 3 times, and we record the maximum value, adjusted for gender and BMI. Men: BMI ≤24 and grip strength ≤29; BMI 24.1-26 and grip strength ≤30; BMI 26.1-28 and grip strength ≤30; BMI > 28 and grip strength ≤32. Women: BMI ≤

1  
2  
3  
4 150 23 and grip strength $\leq$ 17;BMI 23.1-26 and grip strength $\leq$ 17.3;BMI 26.1-29 and grip strength $\leq$   
5  
6  
7 151 18;BMI $>$ 29 and grip strength $\leq$ 21.

### 9 152 **2.2.2Dependent variables**

10  
11  
12 153 HRQoL was measured by the health utility value of EQ-5D-5L<sup>38</sup>.The EQ-5D-5L consists of the  
13  
14 154 EQ-5D-5L descriptive system and the EQ visual analogue scale (EQ-VAS). The EQ-5D-5L  
15  
16  
17 155 descriptive system has five elements (mobility, self-care, usual activities, pain/discomfort, and  
18  
19 156 anxiety/depression) and each element includes five level (no problems, some problems, moderate  
20  
21  
22 157 problems, severe problems and extreme problems). The latest EQ-5D-5Lhealth utility scores  
23  
24  
25 158 method refers to Chinese integral conversion table<sup>38</sup>.The range of utility value is [-0.391, 1.000].  
26  
27 159 A higher score indicates better health condition of the respondents. The Cronbach's coefficient  
28  
29  
30 160 was 0.761 in this study.

### 32 161 **2.2.3Mediator**

33  
34  
35 162 Physical disability was evaluated by the Activity of Daily Living Scale (ADLS), which was  
36  
37  
38 163 developed by Lawton and Brody in 1969 to measure the disability of older adults<sup>39 40</sup>. The Scale  
39  
40  
41 164 consists of 14 items, including Physical Self-Maintenance Scale (PSMS) and Instrumental  
42  
43 165 Activities of Daily Living (IADL). The total score is 14-56, with higher scores indicating  
44  
45  
46 166 increased physical disability. A score of 14 and lower indicates completely normal physical  
47  
48 167 ability, a score between 15 and 22 is defined as mild disability, and a score of 23 and higher is  
49  
50  
51 168 defined as severe disability. ADLS is recommended by WHO and has been widely used in older  
52  
53  
54 169 adults in China, with good reliability and validity<sup>41</sup>.Cronbach's alpha was 0.764 in this study.

#### 170 **2.2.4 Moderator**

171 PA was assessed using the IPAQ-SF<sup>36 37</sup>. The questionnaire contains 7 questions, 6 of which were  
172 about physical activity. The IPAQ-SF investigates the PA of the individuals in the last 7 days.  
173 The questionnaire involved three types of intensity activities, including vigorous physical  
174 activity (VPA =8.0 metabolic equivalent [METs]), moderate physical activity (MPA =4.0 ME  
175 Ts), and low physical activity (LPA =3.3 METs). PA of each person engaged in a certain  
176 intensity per week is the METs value corresponding to that physical activity × weekly frequency  
177 × daily time, and the sum of three PA is the total PA (met-h /week). The greater the overall  
178 physical activity value, the higher the physical activity.

#### 179 **2.3 Data analysis**

180 To analyze the data, categorical variables were expressed using frequency and percentages (%)  
181 and continuous data were described using mean (standard deviation). Pearson correlation  
182 coefficient was used to analyze the correlation among physical frailty, physical disability, and  
183 HRQoL. All these analyses were performed using IBM SPSS 24.0 (IBM Corp., Armonk, NY,  
184 USA). All regression coefficients were tested by the bias-corrected percentile Bootstrap method.  
185 The theoretical model was tested by estimating the 95% confidence interval (CI) for mediation  
186 and moderating effects with 5000 sampled with repetition. If the 95% CI did not include 0, it  
187 meant that the statistics was significant. To illuminate the moderating effect, the moderated  
188 variable (PA) is divided into two levels of high and low according to one standard deviation

1  
2  
3  
4 189 above and below the mean( $M+1SD/M-1SD$ )<sup>42-44</sup>. The Split-Plot analysis method was used to  
5  
6 190 further examine the direction of the moderation effect, and draw a diagram explaining the  
7  
8  
9 191 moderation effect<sup>45</sup>. The mediation model and moderated mediation model were tested with the  
10  
11  
12 192 PROCESS V3.3 macro for SPSS<sup>46</sup>. In the current study, we selected Model 4 and Model 59 to  
13  
14 193 analyze the mediating effect and moderated mediation effect. In addition, through t test and  
15  
16  
17 194 ANOVA analysis, we found that HRQoL is related to age and education. Previous studies have  
18  
19  
20 195 also found HRQoL was associated with age and education<sup>47 48</sup>. We controlled age and education  
21  
22 196 in this study. Sampling weights were used in all of the analyses to adjust for the survey design.  
23  
24

#### 25 197 **2.4 Patient and public involvement statement**

26  
27  
28 198 This research was done without patient involvement. No patients were involved in developing  
29  
30  
31 199 the hypothesis and plans for design of this study either. The results would not be disseminated to  
32  
33  
34 200 study participants or any other individuals or communities.  
35

#### 36 37 201 **2.5 Ethical considerations**

38  
39 202 The study was approved by the Ethics Committee of School of Public Health in Shandong  
40  
41  
42 203 University, P. R. China. The participants have been informed of the purpose and procedures of  
43  
44  
45 204 the study before the investigation. Before the study began, participants had signed written  
46  
47  
48 205 informed consent indicating that they were fully aware of the study procedures.  
49  
50

51 206

### 52 53 54 207 **3. Results**

### 208 **3.1 Common method biases**

209 We used Harman single factor test to conduct a common method biases test<sup>49</sup>. The results show  
210 that there are 12 factors with eigenvalues greater than 1, and the variance explained by the first  
211 factor is 17.92%, which is less than 40% of the critical standard, indicating that there are no  
212 serious common method biases in this study.

### 213 **3.2 Socio-demographic characteristics of the participants**

214 There were 3,243 participants, comprising 2,060 (63.5%) women and 1,182 (36.5%) men. The  
215 average age was 69.88 (SD=6.10) years, ranging from 60 to 97 years. Of the participants, 25.5%  
216 were single. About 72.4% had chronic disease. The majority (81.9%) were empty nest elderly.

### 217 **3.3 Bivariate correlations of main variables**

218 The mean, standard deviation/ Median (Quartile<sub>1</sub>, Quartile<sub>3</sub>) and correlation coefficient of each  
219 variable were shown in Table 1. Physical frailty was positively correlated with physical disability  
220 ( $\rho = 0.283, P < 0.01$ ), physical frailty was negatively correlated with HRQoL ( $\rho = -0.429, P <$   
221  $0.01$ ) and PA ( $\rho = -0.378, P < 0.01$ ). Physical disability was negatively correlated with HRQoL  
222 ( $\rho = -0.378, P < 0.01$ ) and PA ( $\rho = -0.194, P < 0.01$ ). PA was positively correlated with HRQoL  
223 ( $\rho = 0.258, p < 0.01$ ).

### 224 **3.4 Mediation effect analysis**

225 Model 4 in the SPSS macro compiled by Hayes 2013<sup>46</sup> was used to test the mediating effect of  
226 physical disability in the relationship between physical frailty and HRQoL under the control  
227 variable of age, education. As shown in Table 2 and Table 3, physical frailty had a significant

1  
2  
3  
4 228 predictive effect on quality of life ( $\beta = -0.423, t = -26.031, P < 0.001$ ), and the direct predictive  
5  
6  
7 229 effect of frailty on quality of life was still significant when the mediating variable physical  
8  
9 230 disability was added. Meanwhile, physical frailty had a significant positive predictive effect on  
10  
11  
12 231 physical disability ( $\beta = 0.295, t = 17.729, P < 0.001$ ). Physical disability also has a significant  
13  
14 232 negative predictive effect on HRQoL ( $\beta = -0.482, t = -32.407, P < 0.001$ ). In addition, the upper  
15  
16  
17 233 and lower limits of the Bootstrap 95% CI for the direct effect of physical frailty on HRQoL and  
18  
19  
20 234 the mediating effect of physical disability on physical frailty and HRQoL did not include 0 (Table  
21  
22 235 3), indicating that the mediating effect was significant. The mediating effect value was -0.143 and  
23  
24  
25 236 the 95% CI was [-0.175, -0.113], which accounted for 33.71% of the total effect. This shows that  
26  
27  
28 237 disability plays a partial mediating role in the relationship between physical frailty and HRQoL.

### 238 3.5 Moderated mediation effect analysis

239 PROCESS macro method (Model 59) compiled by Hayes (2013)<sup>46</sup> was used to test the  
240 moderated mediation model while controlling for age and education (Table 4 and Table 5). After  
241 PA was put into the model, the interaction term between physical frailty and PA significantly  
242 predicted physical disability ( $\beta = -0.120, t = -7.058, P < 0.001$ ) (Table 4, Model 1), and the  
243 interaction term between physical disability and PA also had a significant predictive effect on  
244 HRQoL ( $\beta = 0.115, t = 6.104, P < 0.001$ ). But, the interaction term between physical frailty and PA  
245 had no effect on HRQoL (Table 4, Model 2). These results suggest PA played a moderating role in  
246 the relationships between physical frailty and physical disability and between physical disability  
247 and HRQoL. However, PA did not significantly moderate the relationships between physical

1  
2  
3  
4 248 frailty and HRQoL. Simple slope analyses indicated that the significant interaction at 1 SD  
5  
6 249 below the mean(M-1SD) and 1 SD above the mean(M+1SD) of physical activity (See Fig. 2 and  
7  
8  
9 250 Fig. 3).Physical frailty had a significant predictive effect on the disability of individuals with  
10  
11 251 high-level((M+1SD) or low-level(M-1SD) PA, but the predictive effect of physical frailty on  
12  
13  
14 252 physical disability was stronger for individuals with low-level PA( $b_{\text{simple}} = 0.370, t = 16.979, P <$   
15  
16  
17 253  $0.001$ ) than for individuals with high-level PA,as shown in Fig. 2 ( $b_{\text{simple}} = 0.120, t = 4.322, P <$   
18  
19  
20 254  $0.001$ ).Fig. 3 showed that for high levels of PA individuals, the effect of physical disability and  
21  
22 255 HRQoL was significant ( $b_{\text{simple}} = -0.304, t = -9.149, P < 0.001$ ). However, for low-level of PA  
23  
24  
25 256 individuals, the effect of physical disability and HRQoL was still significant but considerably  
26  
27 257 stronger ( $b_{\text{simple}} = -0.543, t = -28.654, P < 0.001$ ).In addition, as the level of physical activity  
28  
29  
30 258 increased, the mediating effect of physical disability on the relationship between physical frailty  
31  
32  
33 259 and HRQoL declined (Table 5).

#### 34 35 260 **4. Discussion**

36  
37  
38 261 In this study, a moderated mediation model was established with the mediation role of physical  
39  
40 262 disability on the relationship between physical frailty and HRQoL, as well as the role of PA as a  
41  
42  
43 263 moderator in this indirect path between physical frailty and HRQoL. These findings  
44  
45  
46 264 preliminarily elucidate the potential causes of physical frailty on HRQoL and facilitate the  
47  
48 265 development of targeted interventions for individuals so as to improve HRQoL in rural older  
49  
50  
51 266 adults.

52  
53 267 Consistent with previous studies<sup>50 51</sup>, we find that physical frailty negatively affect HRQoL



1  
2  
3  
4 268 of older adults. This suggests that as the degree of physical frailty increases, the quality of life in  
5  
6 269 older adults becomes worse. Although many studies have established a direct relationship  
7  
8  
9 270 between frailty and HRQoL, few have explored the underlying mechanisms of this relationship.  
10  
11 271 Our study demonstrates that the physical disability mediates the physical frailty and HRQoL,  
12  
13  
14 272 with the mediating rate of 33.71%. A study also suggested that physical disability was one of the  
15  
16  
17 273 potential factors underlying the association between frailty and HRQoL, which was similar with  
18  
19  
20 274 our study<sup>52</sup>.

21  
22 275 The current study indicates that physical frailty is associated with disability, which is  
23  
24  
25 276 consistent with a study by Kojuma G<sup>53</sup>. Frail older adults are very vulnerable to adverse health  
26  
27  
28 277 effects. A study indicated the risk of disability in the frail older adults was 12- to 13-fold  
29  
30  
31 278 increased than that in the non-frail older adults<sup>54</sup>. Meanwhile, this study also demonstrates that  
32  
33  
34 279 the negative predictive effect of disability on individual HRQoL, which was consistent with  
35  
36  
37 280 previous studies<sup>55 56</sup>. The possible explanation is that disabled older adults' poor self-care ability  
38  
39  
40 281 deteriorates their health, such as their normal physiological activities are restricted, physiological  
41  
42  
43 282 function is declined, social interaction is reduced, which adversely affect their physical and  
44  
45  
46 283 mental health and ultimately reduce HRQoL.. One study found that disability was the most  
47  
48  
49 284 important health problem for older adults, which seriously affected their quality of life in old  
50  
51  
52 285 adults' later years<sup>57</sup>. The disability was the most important factor that contributed to decreasing  
53  
54  
55 286 quality of life in older adults. Physical disability has been shown to be associated with increased  
56  
57  
58 287 chronic diseases, and premature mortality<sup>58 59</sup>, all of which could adversely affect the quality of

1  
2  
3  
4 288 life of older adults<sup>60</sup>. Therefore, physical frailty may reduce HRQoL of rural older adults by  
5  
6 289 increasing their disability.  
7

8  
9 290 In the present study, we also find that PA plays a moderating role in the indirect effect  
10  
11 291 between physical frailty and HRQoL. A larger indirect effect is observed among rural older  
12  
13 292 adults with low-level of PA than among those with average or high-level of PA. Specifically, PA  
14  
15 293 moderates the relationship between physical frailty and physical disability, and between physical  
16  
17 294 disability and HRQoL. For older adults with low-level PA, the impact of physical frailty on  
18  
19 295 physical disability is stronger than older adults with high-level PA. This finding indicates that  
20  
21 296 PA moderates the relation between physical frailty and physical disability. We speculate that  
22  
23 297 older adults with low-level PA may have a decline in their physiological system reserves, leading  
24  
25 298 to a deterioration of their functional status and ultimately increasing the possibility of physical  
26  
27 299 frailty and disability<sup>61</sup>. A systematic review showed that older adults without exercise habits were  
28  
29 300 at greater risk of developing frailty. Taichi, resistance sports and other physical activities might  
30  
31 301 effectively improve the health of older adults, reduce the symptoms of physical weakness, and  
32  
33 302 prevent the occurrence of physical disability<sup>62</sup>. Compared with older adults with high-level  
34  
35 303 PA, older adults with low-level PA are more vulnerable to the negative effects of physical frailty.  
36  
37 304 As a result, physical frailty may cause more interference in older adults with low-level PA and  
38  
39 305 increase the risk of physical disability.  
40  
41  
42  
43  
44  
45  
46  
47  
48  
49

50 306 We also find that physical disability has a significant impact on quality of life at both high  
51  
52 307 and low-level of PA. Compared with older adults with high levels of PA, physical disability is  
53  
54  
55

1  
2  
3  
4 308 more likely to adversely affect HRQoL of older adults with low-level PA. A study showed that  
5  
6 309 low-level PA was a major contributing factor for older adults disability<sup>63</sup>. As the level of  
7  
8  
9 310 disability increases, the individuals with low-level of PA experience a more serious functional  
10  
11 311 decline and become more worried about the health status, thus further negatively affect the  
12  
13  
14 312 HRQoL<sup>64</sup>. In addition, physical disability has a greater effect on individuals with low-level PA  
15  
16  
17 313 than high-level PA, which indicates that PA plays a moderating role between physical disability  
18  
19 314 and HRQoL. One study found that PA could improve the physical function and daily life  
20  
21  
22 315 activities of disabled older adults, and ultimately improved the life of older adults  
23  
24  
25 316 quality<sup>65</sup>. Therefore, a low-level of PA might be associated with poor quality of life in rural older  
26  
27 317 adults with high disability.

28  
29  
30 318 However, physical activity does not moderate the direct relationship between physical  
31  
32 319 frailty and HRQoL. Physical frailty may lead to a decline in physical function, muscle strength  
33  
34  
35 320 and physical activity in older adults, which may increase the risk of adverse health outcomes  
36  
37  
38 321 and ultimately affects HRQoL of older adults. Currently, there are few studies on the  
39  
40 322 moderating role of physical activity between physical frailty and HRQoL. Further research is  
41  
42  
43 323 needed to explore the underlying reasons for such findings.

44  
45 324 Based on our findings, we recommended that community health managers should  
46  
47  
48 325 focus on ensuring the medical assistance, life care of older adults with physical frailty or physical  
49  
50  
51 326 disability. Besides, rural communities should establish some public facilities or organize some  
52  
53 327 public activities to encourage older adults to participate in sports activities, and ultimately

1  
2  
3  
4 328 improve health and promote their HRQoL. There are several limitations in this study. First, our  
5  
6 329 study was based on a cross-sectional study, which could not provide strong evidence of causation.  
7  
8  
9 330 Future research could adopt a longitudinal design or experiments to explore the causal  
10  
11 331 relationship between physical frailty and HRQoL. Secondly, the data in this study comes from  
12  
13  
14 332 the participants' self-report information, which might result in recall bias. Thirdly, this study  
15  
16  
17 333 only included age and education as control variables. The study may also be affected by other  
18  
19 334 confounding factors. In the future, we will include more confounding factors related to quality of  
20  
21  
22 335 life to verify our findings. Fourthly, physical disability has a partly mediating effect on the  
23  
24  
25 336 relationship between physical frailty and HRQoL, which indicates that there are other mediating  
26  
27 337 variables in this relationship. More potential mechanisms related to physical frailty and HRQoL  
28  
29  
30 338 among older adults need to be explored in the future.

31  
32  
33 339

### 340 **Conclusion**

341 This study shows that physical frailty is related to HRQoL, and physical disability mediates the  
342 relationship between physical frailty and HRQoL, and PA moderates the mediating relationship.  
343 A greater effect is observed among rural older adults with low-level of PA than that among those  
344 with high-level of PA. This will help to elucidate the underlying mechanism of the relationship  
345 between physical frailty and HRQoL and form an effective way to improve the HRQoL of older  
346 adults in rural areas.

347  
348  
349  
350  
351  
352  
353  
354  
355  
356  
357  
358  
359  
360

1  
2  
3  
4 348 **Acknowledgements**

5  
6 349 We thank the officials of health agencies, all participants and staffs at the study sites for their  
7  
8  
9 350 cooperation.

10  
11 351 **Contributors**

12  
13  
14 352 Study concept and design: Chengchao Zhou and Wenting Hao. Acquisition of data: Dan Zhao,  
15  
16 353 Caiting Yu and Yemin Yuan. Analysis and interpretation of data: Peipei Fu, Zhengyue Jing and  
17  
18 354 Yi Wang. Drafting of the manuscript: Wenting Hao. Critical revision of the manuscript for  
19  
20  
21 355 important intellectual content: Chengchao Zhou and Jie Li. All authors read and approved the  
22  
23 356 final manuscript.

24  
25  
26  
27 357 **Funding**

28  
29 358 This study was supported by the National Natural Science Foundation of China(71774104,  
30  
31 359 71473152, 71974117), the China Medical Board (16-257), Cheeloo Youth Scholar Grant,  
32  
33 360 Shandong University(IFYT1810,2012DX006) and NHC Key Laboratory of Health Economics  
34  
35  
36 361 and Policy Research(NHC-HEPR2019014).

37  
38  
39  
40 362 **Data availability statement**

41  
42 363 The data that support the findings of this study are available from the corresponding author upon  
43  
44  
45 364 reasonable request.

46  
47 365 **Competing interests**

48  
49  
50 366 None declared.

51  
52  
53 367 **Patient consent for publication**

368 Not required.

369

## 370 REFERENCES

- 371 1. NBSC. Statistical communiqué of the People's Republic of China on the 2017 national economic and social  
372 development. 2017 [updated February 28,2018. Available from:  
373 [http://www.stats.gov.cn/english/PressRelease/201802/t20180228\\_1585666.html](http://www.stats.gov.cn/english/PressRelease/201802/t20180228_1585666.html).
- 374 2. United Nations DESA, Population Division. World Population Ageing 2017:Highlights 2017 [updated 2017.  
375 Available from:  
376 [https://www.un.org/en/development/desa/population/publications/pdf/ageing/WPA2017\\_Highlights.pdf](https://www.un.org/en/development/desa/population/publications/pdf/ageing/WPA2017_Highlights.pdf).
- 377 3. Brown DS, Thompson WW, Zack MM, et al. Associations Between Health-Related Quality of Life and Mortality  
378 in Older Adults. *Prevention Science* 2015;16(1):21-30. doi: 10.1007/s1121-013-0437-z
- 379 4. Zhou B, Chen K, Wang J, et al. Quality of Life and Related Factors in the Older Rural and Urban Chinese  
380 Populations in Zhejiang Province. *J Appl Gerontol* 2011;30(2):199-225. doi: 10.1177/0733464810361346
- 381 5. Zhou Z, Zhou Z, Gao J, et al. Urban-rural difference in the associations between living arrangements and the  
382 health-related quality of life (HRQOL) of the elderly in China-Evidence from Shaanxi province. *PLoS One*  
383 2018;13(9):e0204118. doi: 10.1371/journal.pone.0204118 [published Online First: 2018/09/21]
- 384 6. Morley JE, Vellas B, Van Kan GA, et al. Frailty Consensus: A Call to Action. *J Am Med Dir Assoc*  
385 2013;14(6):392-97. doi: 10.1016/j.jamda.2013.03.022
- 386 7. Collard RM, Boter H, Schoevers RA, et al. Prevalence of frailty in community-dwelling older persons: a  
387 systematic review. *J Am Geriatr Soc* 2012;60(8):1487-92. doi: 10.1111/j.1532-5415.2012.04054.x  
388 [published Online First: 2012/08/14]
- 389 8. Vermeiren S, Vellaazzopardi R, Beckwee D, et al. Frailty and the Prediction of Negative Health Outcomes: A  
390 Meta-Analysis. *J Am Med Dir Assoc* 2016;17(12) doi: 10.1016/j.jamda.2016.09.010
- 391 9. Lee IC, Chiu YH, Lee CY. Exploration of the importance of geriatric frailty on health-related quality of life.  
392 *Psychogeriatrics* 2016;16(6):368-75. doi: 10.1111/psyg.12179 [published Online First: 2016/01/13]
- 393 10. Ferrer A, Formiga F, Cunillera O, et al. Predicting factors of health-related quality of life in octogenarians: a  
394 3-year follow-up longitudinal study. 2015;24(11):2701-11.

- 1  
2  
3 395 11. Provencher V, Sirois MJ, Émond M, et al. Frail older adults with minor fractures show lower health-related  
4 396 quality of life (SF-12) scores up to six months following emergency department discharge. *Health Qual*  
5 397 *Life Outcomes* 2016;14:40. doi: 10.1186/s12955-016-0441-7 [published Online First: 2016/03/10]  
6  
7  
8  
9 398 12. Kanauchi M, Kubo A, Kanauchi K, et al. Frailty, health-related quality of life and mental well-being in older  
10 399 adults with cardiometabolic risk factors. *Int J Clin Pract* 2008;62(9):1447-51. doi:  
11 400 10.1111/j.1742-1241.2008.01830.x [published Online First: 2008/07/23]  
12  
13  
14 401 13. Fullerton E, Yu B, Nurjeter A, et al. Basic ADL Disability and Functional Limitation Rates Among Older  
15 402 Americans From 2000–2005: The End of the Decline? *J Gerontol A Biol Sci Med Sci* 2009;64(12):1333-36.  
16 403 doi: 10.1093/gerona/64.12.1333  
17  
18  
19 404 14. Picavet HSJ, Hoeymans N. Physical disability in The Netherlands: Prevalence, risk groups and time trends.  
20 405 *Public Health* 2002;116(4):231-37. doi: 10.1038/sj.ph.1900864  
21  
22  
23 406 15. Evenhuis HM, Hermans H, Hilgenkamp TIM, et al. Frailty and Disability in Older Adults with Intellectual  
24 407 Disabilities: Results from the Healthy Ageing and Intellectual Disability Study. *J Am Geriatr Soc*  
25 408 2012;60(5):934-38. doi: 10.1111/j.1532-5415.2012.03925.x  
26  
27  
28 409 16. Dent E, Chapman I, Howell S, et al. Frailty and functional decline indices predict poor outcomes in hospitalised  
29 410 older people. *Age Ageing* 2014;43(4):477-84. doi: 10.1093/ageing/aft181  
30  
31  
32 411 17. Papachristou E, Wannamethee SG, Lennon LT, et al. Ability of Self-Reported Frailty Components to Predict  
33 412 Incident Disability, Falls, and All-Cause Mortality: Results From a Population-Based Study of Older  
34 413 British Men. *J Am Med Assoc* 2017;318(2):152-57. doi: 10.1001/jama.2016.08.020 [published Online  
35 414 First: 2016/10/16]  
36  
37  
38  
39 415 18. Bandeen-Roche K, Seplaki CL, Huang J, et al. Frailty in Older Adults: A Nationally Representative Profile in  
40 416 the United States. *J Gerontol A Biol Sci Med Sci* 2015;70(11):1427-34. doi: 10.1093/gerona/glv133  
41 417 [published Online First: 2015/08/25]  
42  
43  
44 418 19. Makizako H, Shimada H, Doi T, et al. Impact of physical frailty on disability in community-dwelling older  
45 419 adults: a prospective cohort study. *BMJ open* 2015;5(9):e008462. doi: 10.1136/bmjopen-2015-008462  
46 420 [published Online First: 2015/09/05]  
47  
48  
49 421 20. Medhi GK, Sarma J, Pala S, et al. Association between health related quality of life (HRQOL) and activity of  
50 422 daily living (ADL) among elderly in an urban setting of Assam, India. *J Family Med Prim Care*  
51 423 2019;8(5):1760-64. doi: 10.4103/jfmpe.jfmpe\_270\_19 [published Online First: 2019/06/15]  
52  
53  
54  
55  
56  
57  
58  
59  
60

- 1  
2  
3 424 21. Tavassoli N, Guyonnet S, Abellan Van Kan G, et al. Description of 1,108 older patients referred by their  
4 425 physician to the "Geriatric Frailty Clinic (G.F.C) for Assessment of Frailty and Prevention of Disability" at  
5 426 the gerontopole. *J Nutr Health Aging* 2014;18(5):457-64. doi: 10.1007/s12603-014-0462-z [published  
6 427 Online First: 2014/06/03]  
7  
8  
9  
10 428 22. Viña J, Salvador-Pascual A, Tarazona-Santabalbina FJ, et al. Exercise training as a drug to treat age associated  
11 429 frailty. *Free Radic Biol Med* 2016;98:159-64. doi: 10.1016/j.freeradbiomed.2016.03.024 [published Online  
12 430 First: 2016/03/30]  
13  
14  
15 431 23. Rector JL, Marceau K, Friedman EM. Moderation of the Association Between Chronic Medical Conditions and  
16 432 Functional Limitations Over Time by Physical Activity: Effects of Age. *J Gerontol A Biol Sci Med Sci*  
17 433 2020;75(1):168-74. doi: 10.1093/gerona/glz020 [published Online First: 2019/02/21]  
18  
19  
20  
21 434 24. Palmer RF, Espino DV, Dergance JM, et al. The role of physical activity and diabetes status as a moderator:  
22 435 functional disability among older Mexican Americans. *Age Ageing* 2012;41(6):752-8. doi:  
23 436 10.1093/ageing/afs106 [published Online First: 2012/10/12]  
24  
25  
26 437 25. Keysor JJ. Does late-life physical activity or exercise prevent or minimize disablement? A critical review of the  
27 438 scientific evidence. *Am J Prev Med* 2003;25(3 Suppl 2):129-36. doi: 10.1016/s0749-3797(03)00176-4  
28 439 [published Online First: 2003/10/14]  
29  
30  
31 440 26. Keysor JJ, Jette AM. Have we oversold the benefit of late-life exercise? *J Gerontol A Biol Sci Med Sci*  
32 441 2001;56(7):M412-23. doi: 10.1093/gerona/56.7.m412 [published Online First: 2001/07/11]  
33  
34  
35 442 27. Rejeski WJ, Mihalko SL. Physical Activity and Quality of Life in Older Adults. *J Gerontol A Biol Sci Med Sci*  
36 443 2001;56(suppl\_2):23-35. doi: 10.1093/gerona/56.suppl\_2.23  
37  
38  
39 444 28. Casas-Herrero A, Izquierdo M. Physical exercise as an efficient intervention in frail elderly persons. *An Sist*  
40 445 *Sanit Navar* 2012;35(1):69-85. doi: 10.4321/s1137-66272012000100007 [published Online First:  
41 446 2012/05/04]  
42  
43  
44 447 29. Mañas A, Del Pozo-Cruz B, Guadalupe-Grau A, et al. Reallocating Accelerometer-Assessed Sedentary Time to  
45 448 Light or Moderate- to Vigorous-Intensity Physical Activity Reduces Frailty Levels in Older Adults: An  
46 449 Isotemporal Substitution Approach in the TSHA Study. *J Am Med Dir Assoc* 2018;19(2):185.e1-85.e6. doi:  
47 450 10.1016/j.jamda.2017.11.003 [published Online First: 2017/12/23]  
48  
49  
50  
51 451 30. Barnett A, Smith B, Lord SR, et al. Community-based group exercise improves balance and reduces falls in  
52 452 at-risk older people: a randomised controlled trial. *Age Ageing* 2003;32(4):407-14. doi:  
53 453 10.1093/ageing/32.4.407 [published Online First: 2003/07/10]  
54  
55



- 1  
2  
3  
4 454 31. Jing Z, Li J, Wang Y, et al. The mediating effect of psychological distress on cognitive function and physical  
5 455 frailty among the elderly: Evidence from rural Shandong, China. *J Affect Disord* 2020;268:88-94. doi:  
6 456 10.1016/j.jad.2020.03.012 [published Online First: 2020/03/12]  
7  
8  
9 457 32. Fried LP, Tangen CM, Walston J, et al. Frailty in older adults: evidence for a phenotype. *J Gerontol A Biol Sci*  
10 458 *Med Sci* 2001;56(3):M146-56. doi: 10.1093/gerona/56.3.m146 [published Online First: 2001/03/17]  
11  
12 459 33. Buta BJ, Walston JD, Godino JG, et al. Frailty assessment instruments: Systematic characterization of the uses  
13 460 and contexts of highly-cited instruments. *Ageing Res Rev* 2016;26:53-61. doi: 10.1016/j.arr.2015.12.003  
14 461 [published Online First: 2015/12/18]  
15  
16  
17 462 34. Bouillon K, Kivimaki M, Hamer M, et al. Measures of frailty in population-based studies: an overview. *BMC*  
18 463 *Geriatr* 2013;13:64. doi: 10.1186/1471-2318-13-64 [published Online First: 2013/06/22]  
19  
20  
21 464 35. Radloff LS. The CES-D Scale A Self-Report Depression Scale for Research in the General Population. *Appl*  
22 465 *Psychol Meas* 1977;1(3):385-401. doi: 10.1177/014662167700100306  
23  
24  
25 466 36. Fan M, Lyu J, He P. Chinese guidelines for data processing and analysis concerning the International Physical  
26 467 Activity Questionnaire. *Zhonghua liu xing bing xue za zhi = Zhonghua liuxingbingxue zazhi*  
27 468 2014;35(8):961-4. [published Online First: 2014/11/08]  
28  
29  
30 469 37. Macfarlane DJ, Lee CC, Ho EY, et al. Reliability and validity of the Chinese version of IPAQ (short, last 7  
31 470 days). *J Sci Med Sport* 2007;10(1):45-51. doi: 10.1016/j.jsams.2006.05.003 [published Online First:  
32 471 2006/06/30]  
33  
34  
35 472 38. Luo N, Liu G, Li M, et al. Estimating an EQ-5D-5L Value Set for China. *Value Health* 2017;20(4):662-69. doi:  
36 473 10.1016/j.jval.2016.11.016 [published Online First: 2017/04/15]  
37  
38  
39 474 39. Lawton MP, Brody EM. Assessment of older people: self-maintaining and instrumental activities of daily living.  
40 475 *The Gerontologist* 1969;9(3):179-86. doi: 10.1093/geront/9.3\_Part\_1.179 [published Online First:  
41 476 1969/01/01]  
42  
43  
44 477 40. Lawton MP. The functional assessment of elderly people. *J Am Geriatr Soc* 1971;19(6):465-81. doi:  
45 478 10.1111/j.1532-5415.1971.tb01206.x [published Online First: 1971/06/01]  
46  
47  
48 479 41. Chen P, Yu ES, Zhang M, et al. ADL dependence and medical conditions in Chinese older persons: a  
49 480 population-based survey in Shanghai, China. *J Am Geriatr Soc* 1995;43(4):378-83. doi:  
50 481 10.1111/j.1532-5415.1995.tb05811.x [published Online First: 1995/04/01]  
51  
52  
53  
54  
55  
56  
57  
58  
59  
60

- 1  
2  
3 482 42. Ng KY, Ang S, Chan KY. Personality and leader effectiveness: a moderated mediation model of leadership  
4 483 self-efficacy, job demands, and job autonomy. *J Appl Psychol* 2008;93(4):733-43. doi:  
5 484 10.1037/0021-9010.93.4.733 [published Online First: 2008/07/23]  
6  
7  
8  
9 485 43. Preacher KJ, Rucker DD, Hayes AF. Addressing Moderated Mediation Hypotheses: Theory, Methods, and  
10 486 Prescriptions. *Multivariate behavioral research* 2007;42(1):185-227. doi: 10.1080/00273170701341316  
11 487 [published Online First: 2007/01/01]  
12  
13  
14 488 44. Holmbeck GN. Toward terminological, conceptual, and statistical clarity in the study of mediators and  
15 489 moderators: examples from the child-clinical and pediatric psychology literatures. *Journal of consulting*  
16 490 *and clinical psychology* 1997;65(4):599-610. doi: 10.1037//0022-006x.65.4.599 [published Online First:  
17 491 1997/08/01]  
18  
19  
20  
21 492 45. Cohen J, Cohen P, West SG, et al. Applied multiple regression/correlation analysis for the behavioral sciences:  
22 493 Routledge 2013.  
23  
24  
25 494 46. Bolin JH, Hayes, Andrew F. (2013). Introduction to Mediation, Moderation, and Conditional Process Analysis:  
26 495 A Regression-Based Approach. New York, NY: The Guilford Press. *J Educ Meas* 2014;51(3):335-37. doi:  
27 496 10.1111/jedm.12050  
28  
29  
30 497 47. Bao XY, Xie YX, Zhang XX, et al. The association between multimorbidity and health-related quality of life: a  
31 498 cross-sectional survey among community middle-aged and elderly residents in southern China. *Health*  
32 499 *Qual Life Outcomes* 2019;17(1):107. doi: 10.1186/s12955-019-1175-0 [published Online First: 2019/06/27]  
33  
34  
35 500 48. Chapman B, Duberstein P, Lyness JM. Personality traits, education, and health-related quality of life among  
36 501 older adult primary care patients. *J Gerontol B Psychol Sci Soc Sci* 2007;62(6):P343-52. doi:  
37 502 10.1093/geronb/62.6.p343 [published Online First: 2007/12/15]  
38  
39  
40  
41 503 49. Podsakoff PM, MacKenzie SB, Lee JY, et al. Common method biases in behavioral research: a critical review of  
42 504 the literature and recommended remedies. *J Appl Psychol* 2003;88(5):879-903. doi:  
43 505 10.1037/0021-9010.88.5.879 [published Online First: 2003/10/01]  
44  
45  
46 506 50. Kanwar A, Singh M, Lennon R, et al. Frailty and health-related quality of life among residents of long-term care  
47 507 facilities. *J Aging Health* 2013;25(5):792-802. doi: 10.1177/0898264313493003 [published Online First:  
48 508 2013/06/27]  
49  
50  
51 509 51. Mulasso A, Roppolo M, Rabaglietti E. The role of individual characteristics and physical frailty on health related  
52 510 quality of life (HRQOL): a cross sectional study of Italian community-dwelling older adults. *Arch Gerontol*  
53 511 *Geriatr* 2014;59(3):542-8. doi: 10.1016/j.archger.2014.08.012 [published Online First: 2014/09/14]

- 1  
2  
3 512 52. Huaxue L, Taifang L, Wenjing Y, et al. Status of frailty and its effect path on quality of life among the elderly in  
4 513 community. *Chinese Nursing Research* 2019;33(21):3645-49.  
5  
6  
7 514 53. Kojima G. Frailty as a predictor of disabilities among community-dwelling older people: a systematic review  
8 515 and meta-analysis. *Disabil Rehabil* 2017;39(19):1897-908. doi: 10.1080/09638288.2016.1212282  
9 516 [published Online First: 2016/08/26]  
10  
11  
12 517 54. Feng L, Zin Nyunt MS, Gao Q, et al. Cognitive Frailty and Adverse Health Outcomes: Findings From the  
13 518 Singapore Longitudinal Ageing Studies (SLAS). *J Am Med Dir Assoc* 2017;18(3):252-58. doi:  
14 519 10.1016/j.jamda.2016.09.015 [published Online First: 2016/11/14]  
15  
16  
17 520 55. Akosile CO, Mgbejedo UG, Maruf FA, et al. Depression, functional disability and quality of life among  
18 521 Nigerian older adults: Prevalences and relationships. *Arch Gerontol Geriatr* 2018;74:39-43. doi:  
19 522 10.1016/j.archger.2017.08.011 [published Online First: 2017/09/28]  
20  
21  
22  
23 523 56. Shin KR, Byeon YS, Kang Y, et al. A study on physical symptom, activity of daily living, and health-related  
24 524 quality of life (HRQoL) in the community-dwelling older adults. *Taehan Kanho Hakhoe chi*  
25 525 2008;38(3):437-44. doi: 10.4040/jkan.2008.38.3.437 [published Online First: 2008/07/08]  
26  
27  
28 526 57. Crimmins EM. Trends in the health of the elderly. *Annu Rev Public Health* 2004;25:79-98. doi:  
29 527 10.1146/annurev.publhealth.25.102802.124401 [published Online First: 2004/03/16]  
30  
31  
32 528 58. Khan ZA, Singh C, Khan T. Correlates of physical disability in the elderly population of Rural North India  
33 529 (Haryana). *J Family Community Med* 2018;25(3):199-204. doi: 10.4103/jfcm.JFCM\_160\_17 [published  
34 530 Online First: 2018/09/18]  
35  
36  
37 531 59. Wei M, Li J, Wang H. Impact of the disability trajectory on the mortality risk of older adults in China. *Arch*  
38 532 *Gerontol Geriatr* 2018;74:174-83. doi: 10.1016/j.archger.2017.10.015 [published Online First: 2017/11/11]  
39  
40  
41 533 60. Gobbens RJ. Associations of ADL and IADL disability with physical and mental dimensions of quality of life in  
42 534 people aged 75 years and older. *PeerJ* 2018;6:e5425. doi: 10.7717/peerj.5425 [published Online First:  
43 535 2018/08/21]  
44  
45  
46 536 61. Rejeski WJ, Brawley LR, Haskell WL. The prevention challenge: an overview of this supplement. *Am J Prev*  
47 537 *Med* 2003;25(3 Suppl 2):107-9. doi: 10.1016/s0749-3797(03)00173-9 [published Online First: 2003/10/14]  
48  
49  
50 538 62. de Labra C, Guimaraes-Pinheiro C, Maseda A, et al. Effects of physical exercise interventions in frail older  
51 539 adults: a systematic review of randomized controlled trials. *BMC Geriatr* 2015;15:154. doi:  
52 540 10.1186/s12877-015-0155-4 [published Online First: 2015/12/03]  
53  
54

- 1  
2  
3 541 63. Kortebein P, Ferrando A, Lombeida J, et al. Effect of 10 days of bed rest on skeletal muscle in healthy older  
4 542 adults. *JAMA* 2007;297(16):1772-4. doi: 10.1001/jama.297.16.1772-b [published Online First: 2007/04/26]  
5  
6  
7 543 64. Ávila-Funes JA, Pina-Escudero SD, Aguilar-Navarro S, et al. Cognitive impairment and low physical activity  
8 544 are the components of frailty more strongly associated with disability. *J Nutr Health Aging*  
9 545 2011;15(8):683-9. doi: 10.1007/s12603-011-0111-8 [published Online First: 2011/10/05]  
10  
11  
12 546 65. Villareal DT, Chode S, Parimi N, et al. Weight loss, exercise, or both and physical function in obese older  
13 547 adults. *N Engl J Med* 2011;364(13):1218-29. doi: 10.1056/NEJMoa1008234 [published Online First:  
14 548 2011/04/01]  
15  
16  
17  
18 549  
19  
20 550  
21  
22 551  
23  
24  
25 552  
26  
27 553  
28  
29 554  
30  
31 555  
32  
33  
34 556  
35  
36 557  
37  
38  
39 558  
40  
41 559  
42  
43 560  
44  
45  
46 561  
47  
48 562  
49  
50 563  
51  
52  
53 564  
54  
55  
56  
57  
58  
59  
60

565 **Table 1 Spearman correlations coefficients of main variables among the participants in Shandong, China,**  
 566 **2019(N=3243)**

| Variable              | M±SD/M(P <sub>25</sub> ,P <sub>75</sub> ) | 1        | 2        | 3       | 4 |
|-----------------------|-------------------------------------------|----------|----------|---------|---|
| 1.Physical frailty    | 1.511±1.071                               | 1        |          |         |   |
| 2.Physical disability | 16.994±4.36                               | 0.283**  | 1        |         |   |
| 3.Physical activity   | 2772(693,4158)                            | -0.378** | -0.194** | 1       |   |
| 4.HRQoL               | 0.896±0.161                               | -0.429** | -0.378** | 0.258** | 1 |

567 M±SD: mean±standard deviation ;M (P<sub>25</sub>,P<sub>75</sub>): Median(Quartile<sub>1</sub>,Quartile<sub>3</sub>)

568 1,2,4 follow normal distribution and are described as M±SD.

569 3 does not follow normal distribution and is described as M (P<sub>25</sub>, P<sub>75</sub>).

570 \*\*P<0.001

573 **Table 2 Testing the mediation effect of physical disability between physical frailty and HRQoL among the**  
 574 **participants in Shandong, China, 2019**

| Predictors          | Model1(HRQoL) |            | Model2(Physical disability ) |           | Model3(HQRoL) |            |
|---------------------|---------------|------------|------------------------------|-----------|---------------|------------|
|                     | β             | t          | β                            | t         | β             | t          |
| Age                 | -0.018        | -0.731     | 0.166                        | 6.349***  | 0.061         | 2.758**    |
| Education           | 0.010         | 0.162      | -0.182                       | -8.326*** | -0.084        | -4.507***  |
| Physical frailty    | -0.423        | -26.031*** | 0.295                        | 17.729*** | -0.280        | -18.957*** |
| Physical disability |               |            |                              |           | -0.482        | -32.407*** |
| R <sup>2</sup>      | 0.181         |            | 0.141                        |           | 0.381         |            |
| F                   | 238.859***    |            | 176.932***                   |           | 499.748***    |            |

575 \*\*P<0.01, \*\*\*P<0.001

1  
2  
3 5764  
5  
6 5777  
8 5789  
10 57911  
12  
13 580 **Table 3 Total effect, direct effect and mediation effect**

|                        | Effect size | BootSE | BootCI |        | Relative effect value |
|------------------------|-------------|--------|--------|--------|-----------------------|
|                        |             |        | Low    | High   |                       |
| <b>Total effect</b>    | -0.423      | 0.020  | -0.461 | -0.382 |                       |
| <b>Direct effect</b>   | -0.280      | 0.017  | -0.313 | -0.247 | 66.29%                |
| <b>Indirect effect</b> | -0.143      | 0.016  | -0.175 | -0.113 | 33.71%                |

14  
15  
16  
17  
18  
19  
20  
21  
22  
23  
24  
25  
26  
27 581 BootSE bootstrap standard error, BootCI bootstrap confidence interval28  
29 58230  
31 58332  
33  
34 58435  
36 58537  
38 58639  
40  
41 58742  
43 58844  
45 58946  
47  
48 59049  
50 59151  
52 59253  
54

55

56

57  
58  
59  
60

593 **Table 4** Testing the moderated mediation effect of physical frailty on HRQoL among the participants in  
 594 **Shandong, China, 2019**

| Predictors                      | Model 1(Physical disability) |           | Model 2(HRQoL) |            |
|---------------------------------|------------------------------|-----------|----------------|------------|
|                                 | $\beta$                      | t         | $\beta$        | t          |
| Age                             | 0.154                        | 5.956***  | 0.062          | 2.763**    |
| Education                       | -0.181                       | -8.393*** | -0.072         | -3.830***  |
| Physical frailty                | 0.246                        | 13.965*** | -0.258         | -16.687*** |
| Physical activity               | -0.104                       | -5.555*** | 0.091          | 4.675***   |
| Physical frailty $\times$ PA    | -0.120                       | -7.058*** | 0.011          | 0.682      |
| Physical disability             |                              |           | -0.422         | -24.375*** |
| Physical disability $\times$ PA |                              |           | 0.115          | 6.104***   |
| R <sup>2</sup>                  | 0.159                        |           | 0.390          |            |
| F                               | 122.004***                   |           | 295.850***     |            |

595 \*\*  $P < 0.01$ , \*\*\*  $P < 0.001$

596

597

598

599 **Table 5** Mediating effect values at different levels of physical activity among the participants in Shandong,  
 600 **China, 2019**

| Physical activity | Effect | BootSE | BootLLCI | BootULCI |
|-------------------|--------|--------|----------|----------|
| M-1SD(low level)  | -0.201 | 0.023  | -0.250   | -0.160   |
| M                 | -0.104 | 0.013  | -0.131   | -0.080   |
| M+1SD(high level) | -0.036 | 0.012  | -0.062   | -0.017   |

601 M mean, 1SD one standard deviation, BootSE bootstrap standard error, BootLLCI bootstrap lower limit

1  
2  
3  
4 602 confidence interval, BootULCI bootstrap upper limit confidence interval.

5  
6 603

7 604

8  
9 605

10  
11 606 **Fig. 1** The conceptual framework of the moderated mediation model

12  
13  
14 607 **Fig. 2** Simple slope analysis shows that physical frailty moderated the relationship between physical frailty and

15  
16  
17 608 physical disability

18  
19  
20 609 **Fig.3** Simple slope analysis shows that physical activity moderated the relationship between physical disability and

21  
22  
23 610 HRQoL

24  
25  
26 611



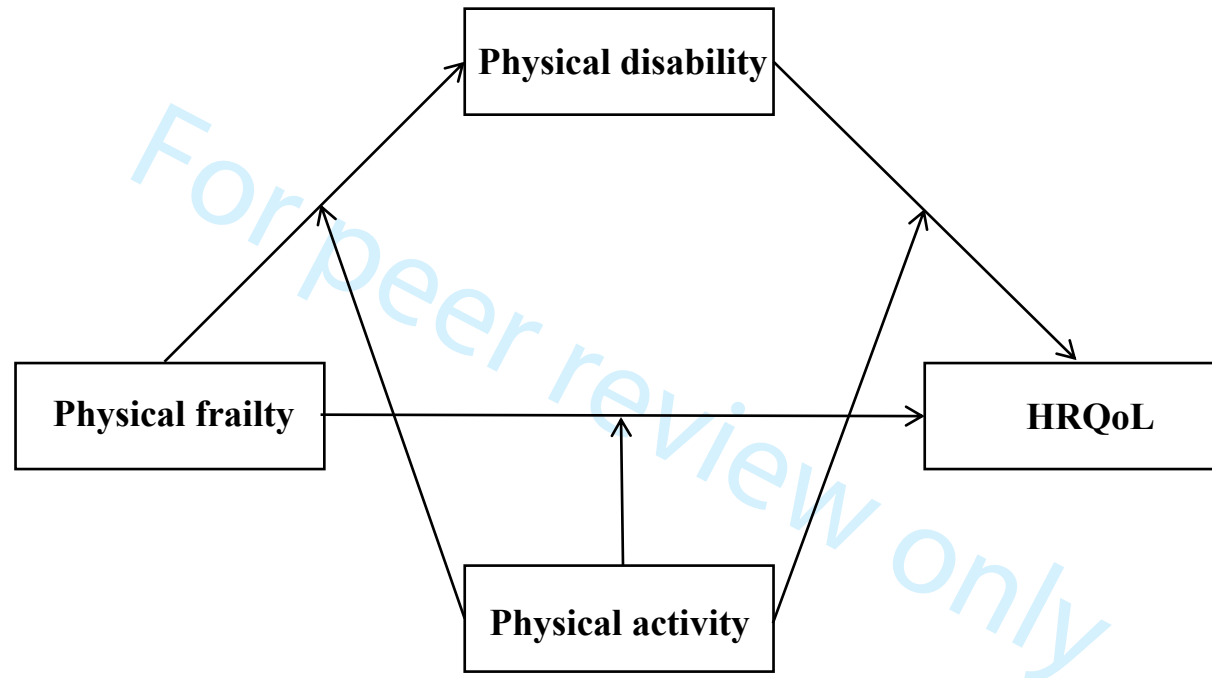

Fig1. The conceptual framework of the moderated mediation model

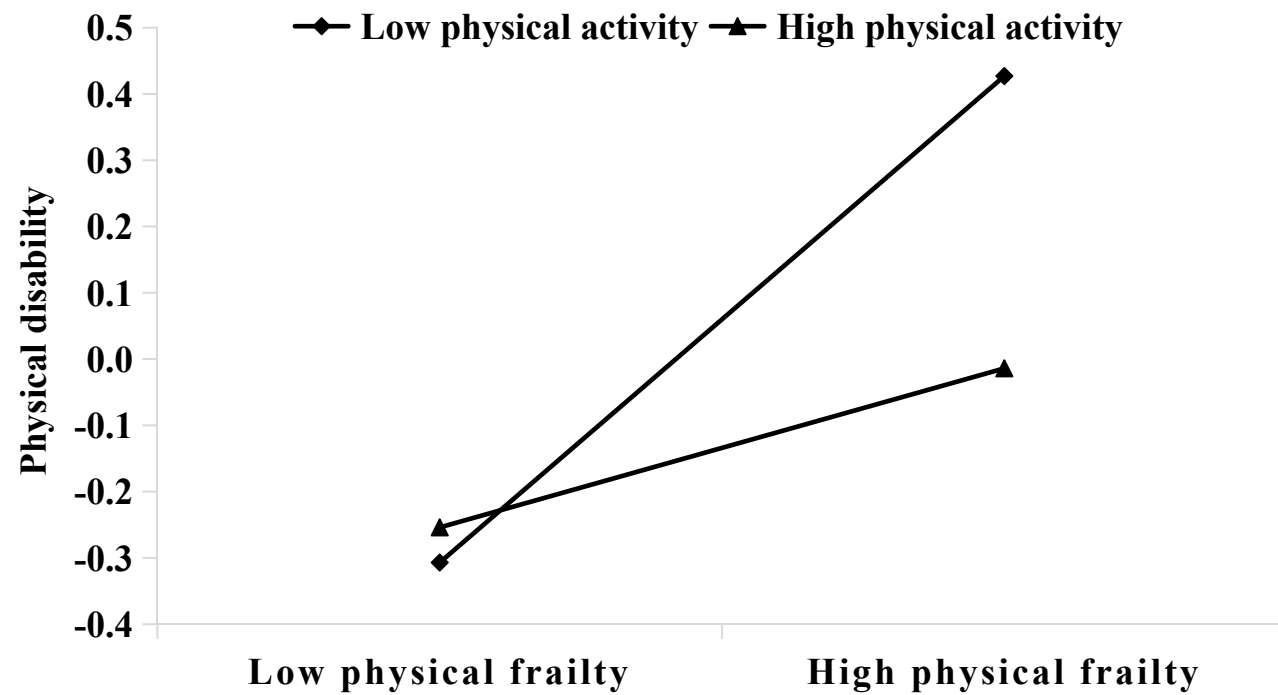

Fig2.Simple slope analysis shows that physical activity moderated the relationship between physical frailty and physical disability

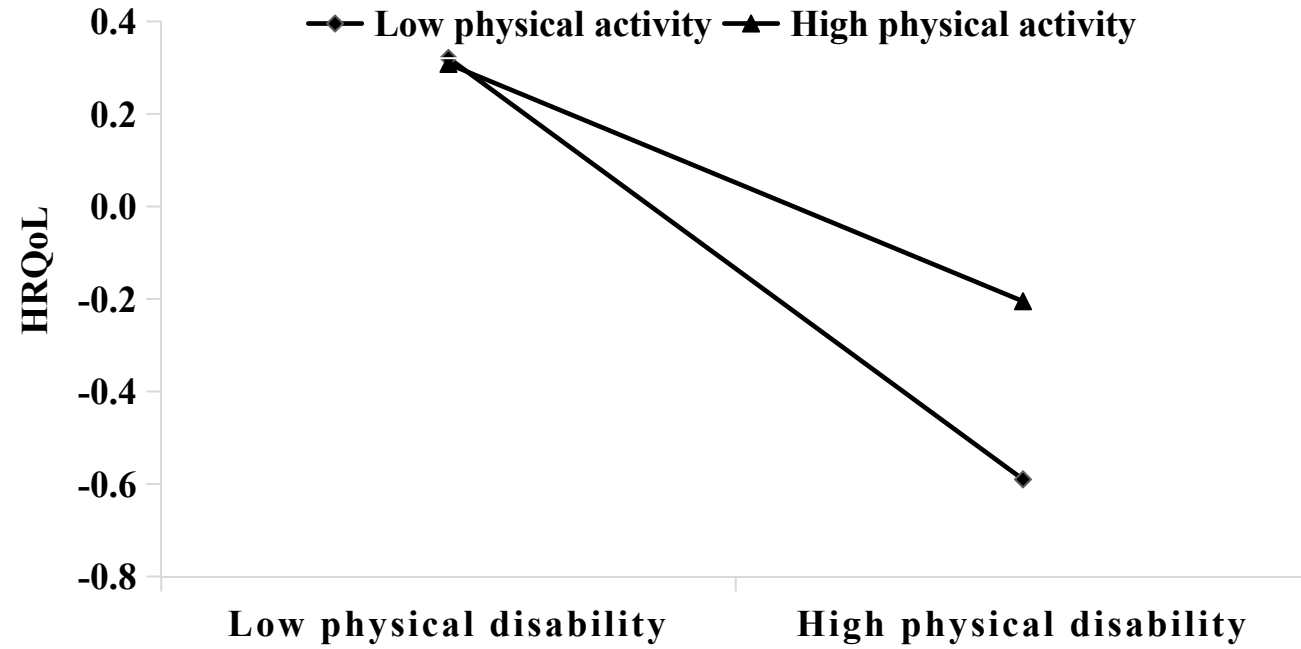

Fig3. Simple slope analysis shows that physical activity moderated the relationship between physical disability and HRQoL

STROBE Statement—Checklist of items that should be included in reports of *cross-sectional studies*

|                           | Item No | Recommendation                                                                                                                                                                                    | Page No |
|---------------------------|---------|---------------------------------------------------------------------------------------------------------------------------------------------------------------------------------------------------|---------|
| <b>Title and abstract</b> | 1       | (a) Indicate the study's design with a commonly used term in the title or the abstract                                                                                                            | P2      |
|                           |         | (b) Provide in the abstract an informative and balanced summary of what was done and what was found                                                                                               | P2      |
| <b>Introduction</b>       |         |                                                                                                                                                                                                   |         |
| Background/rationale      | 2       | Explain the scientific background and rationale for the investigation being reported                                                                                                              | P4-P5   |
| Objectives                | 3       | State specific objectives, including any prespecified hypotheses                                                                                                                                  | P5-P6   |
| <b>Methods</b>            |         |                                                                                                                                                                                                   |         |
| Study design              | 4       | Present key elements of study design early in the paper                                                                                                                                           | P6      |
| Setting                   | 5       | Describe the setting, locations, and relevant dates, including periods of recruitment, exposure, follow-up, and data collection                                                                   | P6      |
| Participants              | 6       | (a) Give the eligibility criteria, and the sources and methods of selection of participants                                                                                                       | P6      |
| Variables                 | 7       | Clearly define all outcomes, exposures, predictors, potential confounders, and effect modifiers. Give diagnostic criteria, if applicable                                                          | P7      |
| Data sources/measurement  | 8*      | For each variable of interest, give sources of data and details of methods of assessment (measurement). Describe comparability of assessment methods if there is more than one group              | P7      |
| Bias                      | 9       | Describe any efforts to address potential sources of bias                                                                                                                                         | P10     |
| Study size                | 10      | Explain how the study size was arrived at                                                                                                                                                         | P6-P9   |
| Quantitative variables    | 11      | Explain how quantitative variables were handled in the analyses. If applicable, describe which groupings were chosen and why                                                                      | P6-P9   |
| Statistical methods       | 12      | (a) Describe all statistical methods, including those used to control for confounding                                                                                                             | P9      |
|                           |         | (b) Describe any methods used to examine subgroups and interactions                                                                                                                               |         |
|                           |         | (c) Explain how missing data were addressed                                                                                                                                                       |         |
|                           |         | (d) If applicable, describe analytical methods taking account of sampling strategy                                                                                                                | P9      |
|                           |         | (e) Describe any sensitivity analyses                                                                                                                                                             |         |
| <b>Results</b>            |         |                                                                                                                                                                                                   |         |
| Participants              | 13*     | (a) Report numbers of individuals at each stage of study—eg numbers potentially eligible, examined for eligibility, confirmed eligible, included in the study, completing follow-up, and analysed |         |
|                           |         | (b) Give reasons for non-participation at each stage                                                                                                                                              |         |
|                           |         | (c) Consider use of a flow diagram                                                                                                                                                                |         |
| Descriptive data          | 14*     | (a) Give characteristics of study participants (eg demographic, clinical, social) and information on exposures and potential confounders                                                          | P10     |
|                           |         | (b) Indicate number of participants with missing data for each variable of interest                                                                                                               |         |
| Outcome data              | 15*     | Report numbers of outcome events or summary measures                                                                                                                                              | P10-    |

|    |                          |    |                                                                                                                                                                                                              |
|----|--------------------------|----|--------------------------------------------------------------------------------------------------------------------------------------------------------------------------------------------------------------|
| 1  |                          |    |                                                                                                                                                                                                              |
| 2  | Main results             | 16 | (a) Give unadjusted estimates and, if applicable, confounder-adjusted estimates and their precision (eg, 95% confidence interval). Make clear which confounders were adjusted for and why they were included |
| 3  |                          |    |                                                                                                                                                                                                              |
| 4  |                          |    |                                                                                                                                                                                                              |
| 5  |                          |    |                                                                                                                                                                                                              |
| 6  |                          |    | (b) Report category boundaries when continuous variables were categorized                                                                                                                                    |
| 7  |                          |    |                                                                                                                                                                                                              |
| 8  |                          |    | (c) If relevant, consider translating estimates of relative risk into absolute risk for a meaningful time period                                                                                             |
| 9  |                          |    |                                                                                                                                                                                                              |
| 10 |                          |    |                                                                                                                                                                                                              |
| 11 | Other analyses           | 17 | Report other analyses done—eg analyses of subgroups and interactions, and sensitivity analyses                                                                                                               |
| 12 |                          |    |                                                                                                                                                                                                              |
| 13 |                          |    |                                                                                                                                                                                                              |
| 14 | <b>Discussion</b>        |    |                                                                                                                                                                                                              |
| 15 | Key results              | 18 | Summarise key results with reference to study objectives                                                                                                                                                     |
| 16 | Limitations              | 19 | Discuss limitations of the study, taking into account sources of potential bias or imprecision. Discuss both direction and magnitude of any potential bias                                                   |
| 17 |                          |    |                                                                                                                                                                                                              |
| 18 |                          |    |                                                                                                                                                                                                              |
| 19 |                          |    |                                                                                                                                                                                                              |
| 20 | Interpretation           | 20 | Give a cautious overall interpretation of results considering objectives, limitations, multiplicity of analyses, results from similar studies, and other relevant evidence                                   |
| 21 |                          |    |                                                                                                                                                                                                              |
| 22 |                          |    |                                                                                                                                                                                                              |
| 23 |                          |    |                                                                                                                                                                                                              |
| 24 | Generalisability         | 21 | Discuss the generalisability (external validity) of the study results                                                                                                                                        |
| 25 |                          |    |                                                                                                                                                                                                              |
| 26 | <b>Other information</b> |    |                                                                                                                                                                                                              |
| 27 | Funding                  | 22 | Give the source of funding and the role of the funders for the present study and, if applicable, for the original study on which the present article is based                                                |
| 28 |                          |    |                                                                                                                                                                                                              |
| 29 |                          |    |                                                                                                                                                                                                              |
| 30 |                          |    |                                                                                                                                                                                                              |

\*Give information separately for exposed and unexposed groups.

**Note:** An Explanation and Elaboration article discusses each checklist item and gives methodological background and published examples of transparent reporting. The STROBE checklist is best used in conjunction with this article (freely available on the Web sites of PLoS Medicine at <http://www.plosmedicine.org/>, Annals of Internal Medicine at <http://www.annals.org/>, and Epidemiology at <http://www.epidem.com/>). Information on the STROBE Initiative is available at [www.strobe-statement.org](http://www.strobe-statement.org).

# BMJ Open

## Physical frailty and health-related quality of life among Chinese rural older adults: A moderated mediation analysis of physical disability and physical activity

|                                 |                                                                                                                                                                                                                                                                                                                                                                                                                                                                                                                                                                                     |
|---------------------------------|-------------------------------------------------------------------------------------------------------------------------------------------------------------------------------------------------------------------------------------------------------------------------------------------------------------------------------------------------------------------------------------------------------------------------------------------------------------------------------------------------------------------------------------------------------------------------------------|
| Journal:                        | <i>BMJ Open</i>                                                                                                                                                                                                                                                                                                                                                                                                                                                                                                                                                                     |
| Manuscript ID                   | bmjopen-2020-042496.R2                                                                                                                                                                                                                                                                                                                                                                                                                                                                                                                                                              |
| Article Type:                   | Original research                                                                                                                                                                                                                                                                                                                                                                                                                                                                                                                                                                   |
| Date Submitted by the Author:   | 07-Dec-2020                                                                                                                                                                                                                                                                                                                                                                                                                                                                                                                                                                         |
| Complete List of Authors:       | Hao, Wenting; School of public health<br>Li, Jie; Shandong University School of Public Health<br>Fu, Peipei; Shandong University Cheeloo College of Medicine<br>Zhao, Dan; Shandong University, school of public health<br>Jing, Zhengyue; Shandong University Cheeloo College of Medicine<br>wang, yi; Shandong University Cheeloo College of Medicine<br>Yu, Caiting; Shandong University Cheeloo College of Medicine<br>Yuan, Yemin; Shandong University School of Public Health<br>Zhou, Chengchao; Shandong University, School of Public Health;<br>Shandong University, China |
| <b>Primary Subject Heading</b>: | Public health                                                                                                                                                                                                                                                                                                                                                                                                                                                                                                                                                                       |
| Secondary Subject Heading:      | Geriatric medicine                                                                                                                                                                                                                                                                                                                                                                                                                                                                                                                                                                  |
| Keywords:                       | Public health < INFECTIOUS DISEASES, Quality in health care < HEALTH SERVICES ADMINISTRATION & MANAGEMENT, SOCIAL MEDICINE                                                                                                                                                                                                                                                                                                                                                                                                                                                          |
|                                 |                                                                                                                                                                                                                                                                                                                                                                                                                                                                                                                                                                                     |

SCHOLARONE™  
Manuscripts



I, the Submitting Author has the right to grant and does grant on behalf of all authors of the Work (as defined in the below author licence), an exclusive licence and/or a non-exclusive licence for contributions from authors who are: i) UK Crown employees; ii) where BMJ has agreed a CC-BY licence shall apply, and/or iii) in accordance with the terms applicable for US Federal Government officers or employees acting as part of their official duties; on a worldwide, perpetual, irrevocable, royalty-free basis to BMJ Publishing Group Ltd ("BMJ") its licensees and where the relevant Journal is co-owned by BMJ to the co-owners of the Journal, to publish the Work in this journal and any other BMJ products and to exploit all rights, as set out in our [licence](#).

The Submitting Author accepts and understands that any supply made under these terms is made by BMJ to the Submitting Author unless you are acting as an employee on behalf of your employer or a postgraduate student of an affiliated institution which is paying any applicable article publishing charge ("APC") for Open Access articles. Where the Submitting Author wishes to make the Work available on an Open Access basis (and intends to pay the relevant APC), the terms of reuse of such Open Access shall be governed by a Creative Commons licence – details of these licences and which [Creative Commons](#) licence will apply to this Work are set out in our licence referred to above.

Other than as permitted in any relevant BMJ Author's Self Archiving Policies, I confirm this Work has not been accepted for publication elsewhere, is not being considered for publication elsewhere and does not duplicate material already published. I confirm all authors consent to publication of this Work and authorise the granting of this licence.

1  
2  
3  
4 1 **Physical frailty and health-related quality of life among Chinese rural older adults: A**  
5  
6 2 **moderated mediation analysis of physical disability and physical activity**

7  
8  
9 3 Wenting Hao<sup>1</sup>, Jie Li<sup>1</sup>, Peipei Fu<sup>1,2</sup>, Dan Zhao<sup>1</sup>, Zhengyue Jing<sup>1</sup>, Yi Wang<sup>1</sup>, Caiting Yu<sup>1</sup>, Yemin  
10 4 Yuan<sup>1</sup>, Chengchao Zhou<sup>1,2\*</sup>

11  
12  
13  
14 5  
15  
16 6 <sup>1</sup>Centre for Health Management and Policy Research, School of Public Health, Cheeloo College  
17 7 of Medicine, Shandong University, Jinan, 250012, China

18  
19 8 <sup>2</sup>NHC Key Lab of Health Economics and Policy Research (Shandong University), Jinan, 250012,  
20 9 China

21  
22  
23  
24 10  
25  
26 11  
27  
28 12 **Corresponding Author:**

29  
30 13 Chengchao Zhou, M.D., Ph.D., 44 Wen-hua-xi Road, Shandong University, Jinan 250012, China

31  
32  
33 14 Tel: 86-531-88381567 Fax: 86-531-88382553

34  
35  
36 15 E-mail: zhouchengchao@sdu.edu.cn

37  
38 16 Word count: 3542



24

**Abstract**

**Objectives:** The purpose of this study is to explore the mediating effect of physical disability, as well as the role of physical activity (PA) as a moderator in the relationship between physical frailty and health-related quality of life (HRQoL) among rural older adults in China.

**Design:** Cross-sectional analysis.

**Setting:** Rural households in Shandong of China (Rushan, Qufu, Laolin).

**Participants and methods:** A survey was conducted among 3,243 rural older adults. The data were collected using questionnaires measuring physical frailty, physical disability, HRQoL and PA. Bootstrap analyses were employed to explore the mediating effect of physical disability and also the moderating role of PA on physical frailty and HRQoL.

**Results:** After controlling for age and education, physical disability partially mediated the effect of physical frailty on HRQoL [indirect effect = -0.143, 95% confidence intervals (CI) = -0.175, -0.113], with the mediating effect accounting for 33.71% of the total effect. PA moderated the relationship between physical frailty and physical disability, as well as the relationship between physical disability and HRQoL. Specifically, the interaction term between physical frailty and PA significantly predicted physical disability ( $\beta = -0.120$ ,  $t = -7.058$ ,  $P < 0.001$ ), and the interaction term between physical disability and PA also had a significant predictive effect on HRQoL ( $\beta = 0.115$ ,  $t = 6.104$ ,  $P < 0.001$ ).

1  
2  
3  
4 43 **Conclusions:**PA appears to moderate the indirect effect of physical disability on the association  
5  
6 44 between physical frailty and HRQoL. This study provides support for potential mechanisms in  
7  
8  
9 45 the association between physical frailty and HRQoL.Encouraging rural older adults to increase  
10  
11  
12 46 PA appropriately might improve HRQoL for older adults with physical frailty and physical  
13  
14 47 disability problems.  
15  
16  
17 48  
18  
19 49 **Key words:** HRQoL; Physical activity; Physical frailty; Physical disability; Rural older  
20  
21  
22 50 adults;Moderated mediation analysis  
23  
24  
25 51  
26  
27 52  
28  
29  
30  
31  
32  
33  
34  
35  
36  
37  
38  
39  
40  
41  
42  
43  
44  
45  
46  
47  
48  
49  
50  
51  
52

1  
2  
3  
4 53 **Strengths and limitations of this study**

- 5  
6  
7 54 1. This is the first study to investigate the moderating and mediating factors of the relationship  
8  
9  
10 55 between physical frailty and HRQoL among older adults in rural China.  
11  
12 56 2. Moderated mediation model was used to explore the potential effect of physical disability  
13  
14  
15 57 and physical activity.  
16  
17 58 3. Cross-sectional data could not provide strong evidence of causation and may result in biased  
18  
19  
20 59 estimates of mediation effects.  
21  
22  
23 60 4. Only two control variables were included in this study, and more confounding factors will be  
24  
25  
26 61 included to verify our results in the future.  
27  
28 62 5. More potential mechanisms related to physical frailty and HRQoL among older adults need  
29  
30  
31 63 to be explored by using longitudinal data in the future.  
32  
33  
34 64  
35  
36  
37 65  
38  
39  
40 66  
41  
42 67  
43  
44  
45 68  
46  
47  
48 69  
49  
50 70  
51  
52  
53  
54  
55  
56  
57  
58  
59  
60

## 1. Introduction

Population aging has become a global social problem. As one of the world's most aging countries, China had 249 million people aged over 60 years in 2018, accounting for 17.9 percent of the total population<sup>1</sup>. It is predicted that by 2050, older adults over 60 will account for more than 35.1% of the total population<sup>2</sup>. With the increasing aging population and the extension of life expectancy, improving health-related quality of life (HRQoL) of older adults is an important public health issue. HRQoL is a predictive factor of mortality in older adults<sup>3</sup>. Compared with urban older adults, the HRQoL of rural older adults is worse<sup>4,5</sup>, which needs more attention.

Physical frailty is a medical syndrome caused by a variety of etiologies and causes, which is characterized by a decline in physical strength, endurance, and decreased physiological function<sup>6</sup>. With the increase of age, the risk of physical frailty increases<sup>7</sup>. Frailty may lead to negative health consequences, including falls, reduced activity, reduced independence, frequent hospitalization, and disability<sup>8</sup>. These adverse outcomes resulted in a decline in the quality of life of older adults. Previous cross-sectional and longitudinal studies have shown that frailty was negatively associated with HRQoL<sup>9-11</sup>, and frail older adults reported worse HRQoL than those who were not frail<sup>12</sup>. Although the association between physical frailty and quality of life has been confirmed, the underlying mechanism remains unclear.

The prevalence of physical disability is high among frail older adults<sup>13,14</sup>. Some studies showed physical frailty was closely related to disability<sup>15,16</sup>, and might be the precursor and cause

1  
2  
3  
4 90 of disability<sup>17</sup>. A national longitudinal study of 7,439 people over 65 in the US showed that frailty  
5  
6 91 was a strong predictor of disability<sup>18</sup>. A prospective two-year cohort study in Japan also showed  
7  
8  
9 92 that frailty and prophase of frailty increased the risk of disability<sup>19</sup>. These findings suggest that  
10  
11  
12 93 physical frailty is associated with disability in older adults. Studies have also demonstrated that  
13  
14 94 the quality of life worsened as the degree of disability increased, and the more severe the  
15  
16  
17 95 disability, the worse the quality of life<sup>20</sup>. Compared with non-disabled older adults, disabled  
18  
19  
20 96 older adults are more prone to falls, depression, anxiety, etc., and their HRQoL was significantly  
21  
22 97 reduced. Therefore, we speculate that frailty may have an indirect effect on individual's HRQoL  
23  
24  
25 98 through the mediating effect of physical disability.

26  
27 99 Physical frailty is considered to be reversible and preventable<sup>21</sup>. Physical activity (PA) is a  
28  
29  
30 100 key factor of reverse and prevent frailty in older adults<sup>22</sup>. Studies have found that physical  
31  
32  
33 101 activity moderated the relationship between chronic illness and functional limitations, and  
34  
35 102 moderated functional disability and body function<sup>23 24</sup>. PA can alleviate the decline of physical  
36  
37  
38 103 function in older adults and has a beneficial effect on functional limitations, physical frailty,  
39  
40 104 disability and quality of life in older adults<sup>25-27</sup>. Studies indicated the positive effect of physical  
41  
42  
43 105 activity on reducing adverse events caused by frailty in older people. Performing a physical  
44  
45  
46 106 activity of moderate to vigorous intensity would improve physical frailty and prevent the  
47  
48 107 occurrence of disability when compared to the performance of a physical activity of low intensity,  
49  
50  
51 108 ultimately promote older adults' quality of life<sup>28-30</sup>. Therefore, PA may moderate the direct and  
52  
53  
54 109 indirect relationship between physical frailty and HRQoL through physical disability as a

1  
2  
3  
4 110 mediator.

5  
6 111 In the present study, we used a cross-sectional study to examine the relationship between  
7  
8  
9 112 physical frailty and HRQoL, focusing on the mediating role of physical disability and the  
10  
11  
12 113 moderating role of PA in the relationship between physical frailty and HRQoL. The conceptual  
13  
14 114 framework of the moderated mediation model was shown in Fig. 1.  
15  
16

## 17 115

## 19 116 **2. Methods**

### 20 117 **2.1.1 Design and sample**

21  
22  
23  
24 118 This study was conducted from May to June, 2019 in Shandong province, China. A multistage  
25  
26  
27 119 stratified cluster sampling method was used to select participants, which was described in detail  
28  
29  
30 120 in a paper we have previously published<sup>31</sup>. Three rural counties (Qufu, Laoling and Rushan) were  
31  
32  
33 121 selected according to the GDP per capita (2018) in Shandong. Within each selected county, five  
34  
35 122 townships were randomly selected. Then, four villages were selected from each selected  
36  
37  
38 123 townships and the elderly aged 60 years old and above who were randomly selected from sample  
39  
40  
41 124 villages. All participants completed the questionnaire independently. A total of 3,600 respondents  
42  
43 125 were recruited from 60 villages and 15 townships in 3 rural counties in Shandong province, of  
44  
45 126 whom 3,243 completed the entire survey, with a response rate of 90.05%.

### 46 127 **2.2. Variables and measurement**

#### 47 48 49 50 128 **2.2.1 Independent variable**

51  
52  
53 129 Physical frailty was measured by Frailty Phenotype<sup>32</sup>. The scale is a widely used frailty screening

1  
2  
3  
4 130 scale with good reliability and validity<sup>33 34</sup>. Frailty was defined based on the following five  
5  
6 131 aspects: weight loss, exhaustion, low physical activity level, slowness, weakness. ①Weight loss:  
7  
8 132 In the past 1 year, participants' body mass index (BMI) decreased by >5.0% (except for personal  
9  
10 deliberate weight loss). ②Exhaustion: Using the Center for Epidemiological Studies-  
11  
12 133 Depression(CES-D)<sup>35</sup>: "How often in the last week did you feel this way?" (1) I could not get  
13  
14 134 going and (2) I felt everything I did was an effort. Either of the above two questions that  
15  
16 135 participants answered 3~4 days and most of the time, was considered exhaustion. ③Low  
17  
18 136 physical activity level: According the International Physical Activity Questionnaire-short Form  
19  
20 137 (IPAQ-SF)<sup>36 37</sup>,we used standard algorithms to calculate the Kcals consumed per week. The  
21  
22 138 criterion is adjusted according to gender. Male: <383 Kcals/ week is a decrease in physical  
23  
24 139 activity, while female: <270 Kcals/ week is a decrease in physical activity. ④Slowness:  
25  
26 140 Slowness was assessed via walking speed at 15 ft measured for 3 times, and we record the  
27  
28 141 minimum value.The criterion is adjusted according to gender and height. Men: height≤173 cm  
29  
30 142 and time≥7 seconds; height >173 cm and time≥6 seconds. Women: height≤159 cm and time≥7  
31  
32 143 seconds ;height >159 cm and time≥6 seconds. ⑤Weakness: Weakness was assessed by grip  
33  
34 144 strength using a handgrip dynamometer was measured for 3 times, and we record the maximum  
35  
36 145 value, adjusted for gender and BMI. Men: BMI≤24 and grip strength≤29;BMI 24.1-26and grip  
37  
38 146 strength≤30;BMI 26.1-28 and grip strength ≤30;BMI > 28 and grip strength≤32. Women:  
39  
40 147 BMI≤23 and grip strength≤17;BMI 23.1-26 and grip strength≤17.3;BMI 26.1-29 and grip  
41  
42 148 strength≤18;BMI>29 and grip strength≤21.  
43  
44  
45  
46  
47  
48  
49  
50  
51  
52  
53  
54  
55  
56  
57  
58  
59  
60

### 150 **2.2.2 Dependent variables**

151 HRQoL was measured by the health utility value of EQ-5D-5L<sup>38</sup>. The EQ-5D-5L consists of the  
152 EQ-5D-5L descriptive system and the EQ visual analogue scale (EQ-VAS). The EQ-5D-5L  
153 descriptive system has five elements (mobility, self-care, usual activities, pain/discomfort, and  
154 anxiety/depression) and each element includes five levels (no problems, some problems,  
155 moderate problems, severe problems and extreme problems). The latest EQ-5D-5L health utility  
156 scores method refers to Chinese integral conversion table<sup>38</sup>. The range of utility value is [-0.391,  
157 1.000]. A higher score indicates better health condition of the respondents. Cronbach's alpha was  
158 0.761 in this study.

### 159 **2.2.3 Mediator**

160 Physical disability was evaluated by the Activity of Daily Living Scale (ADLS), which was  
161 developed by Lawton and Brody in 1969 to measure the disability of older adults<sup>39 40</sup>. The Scale  
162 consists of 14 items, including Physical Self-Maintenance Scale (PSMS) and Instrumental  
163 Activities of Daily Living (IADL). The total score is 14-56, with higher scores indicating  
164 increased physical disability. A score of 14 and lower indicates completely normal physical  
165 ability, a score between 15 and 22 is defined as mild disability, and a score of 23 and higher is  
166 defined as severe disability. ADLS is recommended by WHO and has been widely used in older  
167 adults in China, with good reliability and validity<sup>41</sup>. Cronbach's alpha was 0.764 in this study.

### 168 **2.2.4 Moderator**

169 PA was assessed using the IPAQ-SF<sup>36 37</sup>. The questionnaire contains 7 questions, 6 of which were



1  
2  
3  
4 170 about physical activity. The IPAQ-SF investigates the PA of the individuals in the last 7 days.  
5  
6  
7 171 The questionnaire involved three types of intensity activities, including vigorous physical  
8  
9  
10 172 activity (VPA =8.0 metabolic equivalent [METs]), moderate physical activity (MPA =4.0 ME  
11  
12  
13 173 Ts), and low physical activity (LPA =3.3 METs).PA of each person engaged in a certain  
14  
15  
16 174 intensity per week is the METs value corresponding to that physical activity × weekly frequency  
17  
18  
19 175 × daily time, and the sum of three PA is the total PA (met-h /week). The greater the overall  
20  
21  
22 176 physical activity value, the higher the physical activity.

### 177 **2.3 Data analysis**

178 To analyze the data, categorical variables were expressed using frequency and percentages (%)  
179 and continuous data were described using mean (standard deviation). Spearman correlations  
180 coefficient was used to analyze the correlation among physical frailty, physical disability, and  
181 HRQoL. All these analyses were performed using IBM SPSS 24.0 (IBM Corp., Armonk, NY,  
182 USA). All regression coefficients were tested by the bias-corrected percentile Bootstrap method.  
183 The theoretical model was tested by estimating the 95% confidence interval (CI) for mediation  
184 and moderating effects with 5,000 sampled with repetition. If the 95% CI did not include 0, it  
185 meant that the statistics was significant. To illuminate the moderating effect, the moderated  
186 variable (PA) is divided into two levels of high and low according to one standard deviation  
187 above and below the mean( $M+1SD/M-1SD$ )<sup>42-44</sup>.The Split-Plot analysis method was used to  
188 further examine the direction of the moderation effect, and draw a diagram to explain the

1  
2  
3  
4 189 moderation effect<sup>45</sup>.The mediation model and moderated mediation model were tested with the  
5  
6 190 PROCESS V3.3 macro for SPSS<sup>46</sup>.In the current study, we selected Model 4 and Model 59 to  
7  
8  
9 191 analyze the mediating effect and moderated mediation effect. In addition,through t test and  
10  
11  
12 192 ANOVA analysis, we found that HRQoL was related to age and education. Previous studies have  
13  
14 193 also found HRQoL was associated with age and education<sup>47 48</sup>. We controlled age and education  
15  
16  
17 194 in this study.Sampling weights were used in all of the analyses to adjust for the survey design.  
18  
19

## 20 195 **2.4 Patient and public involvement statement**

21  
22  
23 196 This research was done without patient involvement. No patients were involved in developing  
24  
25 197 the hypothesis and plans for design of this study either. The results would not be disseminated to  
26  
27  
28 198 study participants or any other individuals or communities.  
29  
30

## 31 199 **2.5 Ethical considerations**

32  
33  
34 200 The study was approved by the Ethics Committee of School of Public Health in Shandong  
35  
36  
37 201 University, P. R. China. The participants have been informed of the purpose and procedures of  
38  
39 202 the study before the investigation. Before the study began, participants had signed written  
40  
41  
42 203 informed consent indicating that they were fully aware of the study procedures.  
43  
44  
45  
46 204

## 47 48 49 205 **3. Results**

### 50 51 206 **3.1 Common method biases**

52  
53  
54 207 We used Harman single factor test to conduct a common method biases test<sup>49</sup>.The results show

1  
2  
3  
4 208 that there are 12 factors with eigenvalues greater than 1, and the variance explained by the first  
5  
6 209 factor is 17.92%, which is less than 40% of the critical standard, indicating that there are no  
7  
8  
9 210 serious common method biases in this study.

### 211 **3.2 Socio-demographic characteristics of the participants**

14 212 There were 3,243 participants, comprising 2,060 (63.5%) women and 1,182 (36.5%) men. The  
15  
16  
17 213 average age was 69.88 (SD=6.10) years, ranging from 60 to 97 years. Of the participants, 25.5%  
18  
19  
20 214 were single. About 72.4% had chronic disease. The majority (81.9%) were empty nest elderly.

### 215 **3.3 Bivariate correlations of main variables**

24 216 The mean, standard deviation/ Median (Quartile<sub>1</sub>, Quartile<sub>3</sub>) and correlation coefficient of each  
25  
26  
27 217 variable were shown in Table 1. Physical frailty was positively correlated with physical disability  
28  
29  
30 218 ( $\rho = 0.283, P < 0.01$ ), physical frailty was negatively correlated with HRQoL ( $\rho = -0.429, P <$   
31  
32 219  $0.01$ ) and PA ( $\rho = -0.378, P < 0.01$ ). Physical disability was negatively correlated with HRQoL  
33  
34  
35 220 ( $\rho = -0.378, P < 0.01$ ) and PA ( $\rho = -0.194, P < 0.01$ ). PA was positively correlated with HRQoL  
36  
37  
38 221 ( $\rho = 0.258, P < 0.01$ ).

### 222 **3.4 Mediation effect analysis**

42 223 Model 4 in the SPSS macro compiled by Hayes 2013<sup>46</sup> was used to test the mediating effect of  
43  
44  
45 224 physical disability in the relationship between physical frailty and HRQoL under the control  
46  
47  
48 225 variable of age, education. As shown in Table 2 and Table 3, physical frailty had a significant  
49  
50  
51 226 predictive effect on quality of life ( $\beta = -0.423, t = -26.031, P < 0.001$ ), and the direct predictive  
52  
53  
54 227 effect of frailty on quality of life was still significant when the mediating variable physical

1  
2  
3  
4 228 disability was added. Meanwhile, physical frailty had a significant positive predictive effect on  
5  
6 229 physical disability ( $\beta = 0.295, t = 17.729, P < 0.001$ ). Physical disability also had a significant  
7  
8  
9 230 negative predictive effect on HRQoL ( $\beta = -0.482, t = -32.407, P < 0.001$ ). In addition, the upper  
10  
11 231 and lower limits of the Bootstrap 95% CI for the direct effect of physical frailty on HRQoL and  
12  
13  
14 232 the mediating effect of physical disability on physical frailty and HRQoL did not include 0 (Table  
15  
16  
17 233 3), indicating that the mediating effect was significant. The mediating effect value was -0.143 and  
18  
19 234 the 95% CI was [-0.175, -0.113], which accounted for 33.71% of the total effect. This showed  
20  
21  
22 235 that disability played a partial mediating role in the relationship between physical frailty and  
23  
24  
25 236 HRQoL.

### 237 **3.5 Moderated mediation effect analysis**

238 PROCESS macro method (Model 59) compiled by Hayes (2013)<sup>46</sup> was used to test the  
239 moderated mediation model while controlling for age and education (Table 4 and Table 5). After  
240 PA was put into the model, the interaction term between physical frailty and PA significantly  
241 predicted physical disability ( $\beta = -0.120, t = -7.058, P < 0.001$ ) (Table 4, Model 1), and the  
242 interaction term between physical disability and PA also had a significant predictive effect on  
243 HRQoL ( $\beta = 0.115, t = 6.104, P < 0.001$ ). But the interaction term between physical frailty and  
244 PA had no effect on HRQoL (Table 4, Model 2). These results suggested PA played a moderating  
245 role in the relationships between physical frailty and physical disability and between physical  
246 disability and HRQoL. However, PA did not significantly moderate the relationships between  
247 physical frailty and HRQoL. Simple slope analyses indicated that the significant interaction at 1

1  
2  
3  
4 248 SD below the mean ( $M-1SD$ ) and 1 SD above the mean ( $M+1SD$ ) of physical activity (See Fig. 2  
5  
6  
7 249 and Fig. 3). Physical frailty had a significant predictive effect on the disability of individuals with  
8  
9 250 high-level ( $M+1SD$ ) or low-level ( $M-1SD$ ) PA, but the predictive effect of physical frailty on  
10  
11  
12 251 physical disability was stronger for individuals with low-level PA ( $b_{\text{simple}} = 0.370, t = 16.979, P <$   
13  
14 252  $0.001$ ) than for individuals with high-level PA, as shown in Fig. 2 ( $b_{\text{simple}} = 0.120, t = 4.322, P <$   
15  
16  
17 253  $0.001$ ). Fig. 3 showed that for high levels of PA individuals, the effect of physical disability and  
18  
19 254 HRQoL was significant ( $b_{\text{simple}} = -0.304, t = -9.149, P < 0.001$ ). However, for low-level of PA  
20  
21  
22 255 individuals, the effect of physical disability and HRQoL was still significant but considerably  
23  
24  
25 256 stronger ( $b_{\text{simple}} = -0.543, t = -28.654, P < 0.001$ ). In addition, as the level of physical activity  
26  
27  
28 257 increased, the mediating effect of physical disability on the relationship between physical frailty  
29  
30 258 and HRQoL declined (Table 5).

#### 31 32 259 **4. Discussion**

33  
34  
35 260 In this study, a moderated mediation model was established with the mediation role of physical  
36  
37  
38 261 disability on the relationship between physical frailty and HRQoL, as well as the role of PA as a  
39  
40  
41 262 moderator in this indirect path between physical frailty and HRQoL. These findings preliminarily  
42  
43  
44 263 elucidate the potential causes of physical frailty on HRQoL and facilitate the development of  
45  
46  
47 264 targeted interventions for individuals so as to improve HRQoL in rural older adults.

48 265 Consistent with previous studies<sup>50 51</sup>, we find that physical frailty has a negative association  
49  
50  
51 266 with HRQoL. This suggests that as the degree of physical frailty increases, the quality of life in  
52  
53  
54 267 older adults becomes worse. Although many studies have established a direct relationship

1  
2  
3  
4 268 between frailty and HRQoL, few have explored the underlying mechanisms of this relationship.  
5  
6  
7 269 Our study suggests that physical disability mediates the association between physical frailty and  
8  
9 270 HRQoL, with the mediating rate of 33.71%. A study also suggested that physical disability was  
10  
11 271 one of the potential factors underlying the association between frailty and HRQoL, which was  
12  
13  
14 272 similar with our study<sup>52</sup>.

15  
16  
17 273 The current study indicates that physical frailty is associated with disability, which is  
18  
19 274 consistent with a study by Kojuma G<sup>53</sup>. Frail older adults are very vulnerable to adverse health  
20  
21 275 effects. A study indicated the risk of disability in frail older adults was 12- to 13-fold increased  
22  
23 276 than that in non-frail older adults<sup>54</sup>. Meanwhile, this study also demonstrates a negative predictive  
24  
25 277 effect of disability on individual HRQoL, which was consistent with previous studies<sup>55 56</sup>. The  
26  
27 278 possible explanation is that disabled older adults' poor self-care ability deteriorates their health,  
28  
29 279 then their normal physiological activities are restricted, physiological function is declined, and  
30  
31 280 social interaction is reduced, which adversely affect their physical and mental health and  
32  
33 281 ultimately reduce HRQoL. One study found that disability was the most important health  
34  
35 282 problem for older adults, which seriously affected their quality of life in old adults' later  
36  
37 283 years<sup>57</sup>. The disability was the most important factor that contributed to decreasing quality of life  
38  
39 284 in older adults. Physical disability has been proved to be associated with increased chronic  
40  
41 285 diseases, and premature mortality<sup>58 59</sup>, all of which could adversely affect the quality of life of  
42  
43 286 older adults<sup>60</sup>. Therefore, physical frailty may reduce HRQoL of rural older adults by increasing  
44  
45 287 their disability.

1  
2  
3  
4 288 In the present study, we also find that PA appears to play a moderating role in the indirect  
5  
6 289 effect between physical frailty and HRQoL. A larger indirect effect is observed among rural  
7  
8  
9 290 older adults with low-level of PA than among those with average or high-level of PA.  
10  
11 291 Specifically, PA appears to moderate the relationship between physical frailty and physical  
12  
13  
14 292 disability, and between physical disability and HRQoL. For older adults with low-level PA, the  
15  
16  
17 293 impact of physical frailty on physical disability is stronger than older adults with high-level PA.  
18  
19 294 This finding indicates that PA appears to moderate the relationship between physical frailty and  
20  
21  
22 295 physical disability. We speculate that older adults with low-level PA may have a decline in their  
23  
24  
25 296 physiological system reserves, leading to a deterioration of their functional status and ultimately  
26  
27 297 increasing the possibility of physical frailty and disability<sup>61</sup>. A systematic review showed that  
28  
29  
30 298 older adults without exercise habits were at greater risk of developing frailty. Taichi, resistance  
31  
32  
33 299 sports, and other physical activities might effectively improve the health of older adults, reduce  
34  
35 300 the symptoms of physical weakness, and prevent the occurrence of physical  
36  
37  
38 301 disability<sup>62</sup>. Compared with older adults with high-level PA, older adults with low-level PA are  
39  
40  
41 302 more vulnerable to the negative effects of physical frailty. As a result, physical frailty may cause  
42  
43 303 more interference in older adults with low-level PA and increase the risk of physical disability.  
44

45 304 We also find that physical disability has a significant impact on quality of life at both high  
46  
47  
48 305 and low-level of PA. Compared with older adults with high levels of PA, physical disability is  
49  
50  
51 306 more likely to adversely affect HRQoL of older adults with low-level PA. A study showed that  
52  
53 307 low-level PA was a major contributing factor for older adults' disability<sup>63</sup>. As the level of

1  
2  
3  
4 308 disability increases, the individuals with low-level of PA experience a more serious functional  
5  
6 309 decline and become more worried about the health status, thus further negatively affect the  
7  
8  
9 310 HRQoL<sup>64</sup>. In addition, physical disability has a greater effect on individuals with low-level PA  
10  
11 311 than high-level PA, which indicates that PA plays a moderating role between physical disability  
12  
13  
14 312 and HRQoL. One study found that PA could improve the physical function and daily life  
15  
16  
17 313 activities of disabled older adults, and ultimately improved the life of older adults  
18  
19 314 quality<sup>65</sup>. Therefore, a low-level of PA might be associated with poor quality of life in rural older  
20  
21  
22 315 adults with high disability.

23  
24  
25 316 However, physical activity does not appear to moderate the direct relationship between  
26  
27 317 physical frailty and HRQoL. Physical frailty may lead to a decline in physical function, muscle  
28  
29  
30 318 strength and physical activity in older adults, which may increase the risk of adverse health  
31  
32  
33 319 outcomes and ultimately affects HRQoL of older adults. Currently, there are few studies on the  
34  
35 320 moderating role of physical activity between physical frailty and HRQoL. Further research is  
36  
37  
38 321 needed to explore the underlying reasons for such findings.

39  
40 322 Based on our findings, we recommend that community health managers should focus on  
41  
42  
43 323 ensuring the medical assistance, life care of older adults with physical frailty or physical  
44  
45  
46 324 disability. Besides, rural communities should establish some public facilities or organize some  
47  
48  
49 325 public activities to encourage older adults to participate in sports activities, and ultimately  
50  
51 326 improve health and promote their HRQoL. There are several limitations in this study. First, our  
52  
53 327 study was based on a cross-sectional study, which could not provide strong evidence of causation.



1  
2  
3  
4 328 In addition, using cross-sectional data to examine longitudinal mediation effects can lead to  
5  
6 329 biased estimates of mediation effects<sup>66</sup>. Future research could adopt a longitudinal design or  
7  
8  
9 330 experiments to explore the causal relationship between physical frailty and HRQoL. Secondly,  
10  
11 331 the data in this study comes from the participants' self-report information, which might result in  
12  
13  
14 332 recall bias. Thirdly, this study only included age and education as control variables. The study  
15  
16  
17 333 may also be affected by other confounding factors. In the future, we will include more  
18  
19  
20 334 confounding factors related to quality of life to verify our findings. Fourthly, physical disability  
21  
22 335 has a partly mediating effect on the relationship between physical frailty and HRQoL, which  
23  
24  
25 336 indicates that there are other mediating variables in this relationship. More potential mechanisms  
26  
27  
28 337 related to the association between physical frailty and HRQoL among older adults need to be  
29  
30 338 explored in the future.

### 339 **Conclusion**

340 This study shows that physical frailty is related to HRQoL, and physical disability appears to  
341 mediate the relationship between physical frailty and HRQoL, and PA appears to moderate the  
342 mediating relationship. A greater effect is observed among rural older adults with low-level of  
343 PA than that among those with high-level of PA. This provides support for elucidate the  
344 underlying mechanism of the relationship between physical frailty and HRQoL and form an  
345 effective way to improve the HRQoL of older adults in rural areas.

### 346 **Acknowledgements**

347 We thank the officials of health agencies, all participants and staffs at the study sites for their

1  
2  
3  
4 348 cooperation.

5  
6 349 **Contributors**

7  
8  
9 350 Study concept and design: Chengchao Zhou and WentingHao. Acquisition of data: Dan Zhao,  
10  
11 351 Caiting Yu and Yemin Yuan. Analysis and interpretation of data: Peipei Fu, Zhengyue Jing and  
12  
13 352 Yi Wang. Drafting of the manuscript: WentingHao. Critical revision of the manuscript for  
14  
15  
16 353 important intellectual content: Chengchao Zhou and Jie Li. All authors read and approved the  
17  
18 354 final manuscript.

19  
20  
21  
22 355 **Funding**

23  
24 356 This study was supported by the National Natural Science Foundation of China(71774104,  
25  
26 357 71473152, 71974117), the China Medical Board (16-257), Cheeloo Youth Scholar Grant,  
27  
28 358 Shandong University(IFYT1810,2012DX006) and NHC Key Laboratory of Health Economics  
29  
30  
31 359 and Policy Research(NHC-HEPR2019014).

32  
33  
34 360 **Data availability statement**

35  
36  
37 361 The data that support the findings of this study are available from the corresponding author upon  
38  
39  
40 362 reasonable request.

41  
42 363 **Competing interests**

43  
44  
45 364 None declared.

46  
47 365 **Patient consent for publication**

48  
49  
50 366 Not required.

51  
52  
53 367

## 368 REFERENCES

- 369 1. NBSC. Statistical communiqué of the People's Republic of China on the 2017 national economic and social  
370 development. 2017 [updated February 28,2018. Available from:  
371 [http://www.stats.gov.cn/english/PressRelease/201802/t20180228\\_1585666.html](http://www.stats.gov.cn/english/PressRelease/201802/t20180228_1585666.html).
- 372 2. United Nations DESA, Population Division. World Population Ageing 2017:Highlights 2017 [updated 2017.  
373 Available from:  
374 [https://www.un.org/en/development/desa/population/publications/pdf/ageing/WPA2017\\_Highlights.pdf](https://www.un.org/en/development/desa/population/publications/pdf/ageing/WPA2017_Highlights.pdf)  
375 .
- 376 3. Brown DS, Thompson WW, Zack MM, et al. Associations Between Health-Related Quality of Life and Mortality in  
377 Older Adults. *Prevention Science* 2015;16(1):21-30. doi: 10.1007/s11121-013-0437-z
- 378 4. Zhou B, Chen K, Wang J, et al. Quality of Life and Related Factors in the Older Rural and Urban Chinese  
379 Populations in Zhejiang Province. *J Appl Gerontol* 2011;30(2):199-225. doi: 10.1177/0733464810361346
- 380 5. Zhou Z, Zhou Z, Gao J, et al. Urban-rural difference in the associations between living arrangements and the  
381 health-related quality of life (HRQOL) of the elderly in China-Evidence from Shaanxi province. *PLoS One*  
382 2018;13(9):e0204118. doi: 10.1371/journal.pone.0204118 [published Online First: 2018/09/21]
- 383 6. Morley JE, Vellas B, Van Kan GA, et al. Frailty Consensus: A Call to Action. *J Am Med Dir Assoc* 2013;14(6):392-97.  
384 doi: 10.1016/j.jamda.2013.03.022
- 385 7. Collard RM, Boter H, Schoevers RA, et al. Prevalence of frailty in community-dwelling older persons: a systematic  
386 review. *J Am Geriatr Soc* 2012;60(8):1487-92. doi: 10.1111/j.1532-5415.2012.04054.x [published Online  
387 First: 2012/08/14]
- 388 8. Vermeiren S, Vellaazzopardi R, Beckwee D, et al. Frailty and the Prediction of Negative Health Outcomes: A  
389 Meta-Analysis. *J Am Med Dir Assoc* 2016;17(12) doi: 10.1016/j.jamda.2016.09.010
- 390 9. Lee IC, Chiu YH, Lee CY. Exploration of the importance of geriatric frailty on health-related quality of life.  
391 *Psychogeriatrics* 2016;16(6):368-75. doi: 10.1111/psyg.12179 [published Online First: 2016/01/13]
- 392 10. Ferrer A, Formiga F, Cunillera O, et al. Predicting factors of health-related quality of life in octogenarians: a  
393 3-year follow-up longitudinal study. 2015;24(11):2701-11.

- 1  
2  
3 394 11. Provencher V, Sirois MJ, Émond M, et al. Frail older adults with minor fractures show lower health-related  
4 395 quality of life (SF-12) scores up to six months following emergency department discharge. *Health Qual Life*  
5 396 *Outcomes* 2016;14:40. doi: 10.1186/s12955-016-0441-7 [published Online First: 2016/03/10]
- 8 397 12. Kanauchi M, Kubo A, Kanauchi K, et al. Frailty, health-related quality of life and mental well-being in older  
9 398 adults with cardiometabolic risk factors. *Int J Clin Pract* 2008;62(9):1447-51. doi:  
10 399 10.1111/j.1742-1241.2008.01830.x [published Online First: 2008/07/23]
- 13 400 13. Fullertomson E, Yu B, Nurujeter A, et al. Basic ADL Disability and Functional Limitation Rates Among Older  
14 401 Americans From 2000–2005: The End of the Decline? *J Gerontol A Biol Sci Med Sci* 2009;64(12):1333-36.  
15 402 doi: 10.1093/gerona/glp130
- 18 403 14. Picavet HSJ, Hoeymans N. Physical disability in The Netherlands: Prevalence, risk groups and time trends. *Public*  
19 404 *Health* 2002;116(4):231-37. doi: 10.1038/sj.ph.1900864
- 22 405 15. Evenhuis HM, Hermans H, Hilgenkamp TIM, et al. Frailty and Disability in Older Adults with Intellectual  
23 406 Disabilities: Results from the Healthy Ageing and Intellectual Disability Study. *J Am Geriatr Soc*  
24 407 2012;60(5):934-38. doi: 10.1111/j.1532-5415.2012.03925.x
- 27 408 16. Dent E, Chapman I, Howell S, et al. Frailty and functional decline indices predict poor outcomes in hospitalised  
28 409 older people. *Age Ageing* 2014;43(4):477-84. doi: 10.1093/ageing/aft181
- 31 410 17. Papachristou E, Wannamethee SG, Lennon LT, et al. Ability of Self-Reported Frailty Components to Predict  
32 411 Incident Disability, Falls, and All-Cause Mortality: Results From a Population-Based Study of Older British  
33 412 Men. *J Am Med Dir Assoc* 2017;18(2):152-57. doi: 10.1016/j.jamda.2016.08.020 [published Online First:  
34 413 2016/10/16]
- 37 414 18. Bandeen-Roche K, Seplaki CL, Huang J, et al. Frailty in Older Adults: A Nationally Representative Profile in the  
38 415 United States. *J Gerontol A Biol Sci Med Sci* 2015;70(11):1427-34. doi: 10.1093/gerona/glv133 [published  
39 416 Online First: 2015/08/25]
- 42 417 19. Makizako H, Shimada H, Doi T, et al. Impact of physical frailty on disability in community-dwelling older adults:  
43 418 a prospective cohort study. *BMJ open* 2015;5(9):e008462. doi: 10.1136/bmjopen-2015-008462 [published  
44 419 Online First: 2015/09/05]
- 47 420 20. Medhi GK, Sarma J, Pala S, et al. Association between health related quality of life (HRQOL) and activity of daily  
48 421 living (ADL) among elderly in an urban setting of Assam, India. *J Family Med Prim Care* 2019;8(5):1760-64.  
49 422 doi: 10.4103/jfmpc.jfmpc\_270\_19 [published Online First: 2019/06/15]

- 1  
2  
3 423 21. Tavassoli N, Guyonnet S, Abellan Van Kan G, et al. Description of 1,108 older patients referred by their  
4 424 physician to the "Geriatric Frailty Clinic (G.F.C) for Assessment of Frailty and Prevention of Disability" at  
5 425 the gerontopole. *J Nutr Health Aging* 2014;18(5):457-64. doi: 10.1007/s12603-014-0462-z [published  
6 426 Online First: 2014/06/03]  
7  
8  
9  
10 427 22. Viña J, Salvador-Pascual A, Tarazona-Santabalbina FJ, et al. Exercise training as a drug to treat age associated  
11 428 frailty. *Free Radic Biol Med* 2016;98:159-64. doi: 10.1016/j.freeradbiomed.2016.03.024 [published Online  
12 429 First: 2016/03/30]  
13  
14  
15 430 23. Rector JL, Marceau K, Friedman EM. Moderation of the Association Between Chronic Medical Conditions and  
16 431 Functional Limitations Over Time by Physical Activity: Effects of Age. *J Gerontol A Biol Sci Med Sci*  
17 432 2020;75(1):168-74. doi: 10.1093/gerona/glz020 [published Online First: 2019/02/21]  
18  
19  
20  
21 433 24. Palmer RF, Espino DV, Dergance JM, et al. The role of physical activity and diabetes status as a moderator:  
22 434 functional disability among older Mexican Americans. *Age Ageing* 2012;41(6):752-8. doi:  
23 435 10.1093/ageing/afs106 [published Online First: 2012/10/12]  
24  
25  
26 436 25. Keysor JJ. Does late-life physical activity or exercise prevent or minimize disablement? A critical review of the  
27 437 scientific evidence. *Am J Prev Med* 2003;25(3 Suppl 2):129-36. doi: 10.1016/s0749-3797(03)00176-4  
28 438 [published Online First: 2003/10/14]  
29  
30  
31 439 26. Keysor JJ, Jette AM. Have we oversold the benefit of late-life exercise? *J Gerontol A Biol Sci Med Sci*  
32 440 2001;56(7):M412-23. doi: 10.1093/gerona/56.7.m412 [published Online First: 2001/07/11]  
33  
34  
35 441 27. Rejeski WJ, Mihalko SL. Physical Activity and Quality of Life in Older Adults. *J Gerontol A Biol Sci Med Sci*  
36 442 2001;56(suppl\_2):23-35. doi: 10.1093/gerona/56.suppl\_2.23  
37  
38  
39 443 28. Casas-Herrero A, Izquierdo M. Physical exercise as an efficient intervention in frail elderly persons. *An Sist Sanit*  
40 444 *Navar* 2012;35(1):69-85. doi: 10.4321/s1137-66272012000100007 [published Online First: 2012/05/04]  
41  
42  
43 445 29. Mañas A, Del Pozo-Cruz B, Guadalupe-Grau A, et al. Reallocating Accelerometer-Assessed Sedentary Time to  
44 446 Light or Moderate- to Vigorous-Intensity Physical Activity Reduces Frailty Levels in Older Adults: An  
45 447 Isotemporal Substitution Approach in the TSHA Study. *J Am Med Dir Assoc* 2018;19(2):185.e1-85.e6. doi:  
46 448 10.1016/j.jamda.2017.11.003 [published Online First: 2017/12/23]  
47  
48  
49  
50 449 30. Barnett A, Smith B, Lord SR, et al. Community-based group exercise improves balance and reduces falls in  
51 450 at-risk older people: a randomised controlled trial. *Age Ageing* 2003;32(4):407-14. doi:  
52 451 10.1093/ageing/32.4.407 [published Online First: 2003/07/10]  
53  
54  
55  
56  
57  
58  
59  
60

- 1  
2  
3  
4 452 31. Jing Z, Li J, Wang Y, et al. The mediating effect of psychological distress on cognitive function and physical  
5 453 frailty among the elderly: Evidence from rural Shandong, China. *J Affect Disord* 2020;268:88-94. doi:  
6 454 10.1016/j.jad.2020.03.012 [published Online First: 2020/03/12]  
7  
8  
9 455 32. Fried LP, Tangen CM, Walston J, et al. Frailty in older adults: evidence for a phenotype. *J Gerontol A Biol Sci*  
10 456 *Med Sci* 2001;56(3):M146-56. doi: 10.1093/gerona/56.3.m146 [published Online First: 2001/03/17]  
11  
12 457 33. Buta BJ, Walston JD, Godino JG, et al. Frailty assessment instruments: Systematic characterization of the uses  
13 458 and contexts of highly-cited instruments. *Ageing Res Rev* 2016;26:53-61. doi: 10.1016/j.arr.2015.12.003  
14 459 [published Online First: 2015/12/18]  
15  
16  
17 460 34. Bouillon K, Kivimaki M, Hamer M, et al. Measures of frailty in population-based studies: an overview. *BMC*  
18 461 *Geriatr* 2013;13:64. doi: 10.1186/1471-2318-13-64 [published Online First: 2013/06/22]  
19  
20  
21 462 35. Radloff LS. The CES-D Scale A Self-Report Depression Scale for Research in the General Population. *Appl Psychol*  
22 463 *Meas* 1977;1(3):385-401. doi: 10.1177/014662167700100306  
23  
24  
25 464 36. Fan M, Lyu J, He P. Chinese guidelines for data processing and analysis concerning the International Physical  
26 465 Activity Questionnaire. *Zhonghua liu xing bing xue za zhi = Zhonghua liuxingbingxue zazhi*  
27 466 2014;35(8):961-4. [published Online First: 2014/11/08]  
28  
29  
30 467 37. Macfarlane DJ, Lee CC, Ho EY, et al. Reliability and validity of the Chinese version of IPAQ (short, last 7 days). *J*  
31 468 *Sci Med Sport* 2007;10(1):45-51. doi: 10.1016/j.jsams.2006.05.003 [published Online First: 2006/06/30]  
32  
33  
34 469 38. Luo N, Liu G, Li M, et al. Estimating an EQ-5D-5L Value Set for China. *Value Health* 2017;20(4):662-69. doi:  
35 470 10.1016/j.jval.2016.11.016 [published Online First: 2017/04/15]  
36  
37  
38 471 39. Lawton MP, Brody EM. Assessment of older people: self-maintaining and instrumental activities of daily living.  
39 472 *The Gerontologist* 1969;9(3):179-86. doi: 10.1093/geront/9.3\_Part\_1.179 [published Online First:  
40 473 1969/01/01]  
41  
42  
43 474 40. Lawton MP. The functional assessment of elderly people. *J Am Geriatr Soc* 1971;19(6):465-81. doi:  
44 475 10.1111/j.1532-5415.1971.tb01206.x [published Online First: 1971/06/01]  
45  
46  
47 476 41. Chen P, Yu ES, Zhang M, et al. ADL dependence and medical conditions in Chinese older persons: a  
48 477 population-based survey in Shanghai, China. *J Am Geriatr Soc* 1995;43(4):378-83. doi:  
49 478 10.1111/j.1532-5415.1995.tb05811.x [published Online First: 1995/04/01]  
50  
51  
52  
53  
54  
55  
56  
57  
58  
59  
60

- 1  
2  
3 479 42. Ng KY, Ang S, Chan KY. Personality and leader effectiveness: a moderated mediation model of leadership  
4 480 self-efficacy, job demands, and job autonomy. *J Appl Psychol* 2008;93(4):733-43. doi:  
5 481 10.1037/0021-9010.93.4.733 [published Online First: 2008/07/23]  
6  
7  
8  
9 482 43. Preacher KJ, Rucker DD, Hayes AF. Addressing Moderated Mediation Hypotheses: Theory, Methods, and  
10 483 Prescriptions. *Multivariate behavioral research* 2007;42(1):185-227. doi: 10.1080/00273170701341316  
11 484 [published Online First: 2007/01/01]  
12  
13  
14 485 44. Holmbeck GN. Toward terminological, conceptual, and statistical clarity in the study of mediators and  
15 486 moderators: examples from the child-clinical and pediatric psychology literatures. *Journal of consulting*  
16 487 *and clinical psychology* 1997;65(4):599-610. doi: 10.1037//0022-006x.65.4.599 [published Online First:  
17 488 1997/08/01]  
18  
19  
20  
21 489 45. Cohen J, Cohen P, West SG, et al. Applied multiple regression/correlation analysis for the behavioral sciences:  
22 490 Routledge 2013.  
23  
24  
25 491 46. Bolin JH. Hayes, Andrew F. (2013). Introduction to Mediation, Moderation, and Conditional Process Analysis: A  
26 492 Regression-Based Approach. New York, NY: The Guilford Press. *J Educ Meas* 2014;51(3):335-37. doi:  
27 493 10.1111/jedm.12050  
28  
29  
30 494 47. Bao XY, Xie YX, Zhang XX, et al. The association between multimorbidity and health-related quality of life: a  
31 495 cross-sectional survey among community middle-aged and elderly residents in southern China. *Health*  
32 496 *Qual Life Outcomes* 2019;17(1):107. doi: 10.1186/s12955-019-1175-0 [published Online First: 2019/06/27]  
33  
34  
35 497 48. Chapman B, Duberstein P, Lyness JM. Personality traits, education, and health-related quality of life among  
36 498 older adult primary care patients. *J Gerontol B Psychol Sci Soc Sci* 2007;62(6):P343-52. doi:  
37 499 10.1093/geronb/62.6.p343 [published Online First: 2007/12/15]  
38  
39  
40  
41 500 49. Podsakoff PM, MacKenzie SB, Lee JY, et al. Common method biases in behavioral research: a critical review of  
42 501 the literature and recommended remedies. *J Appl Psychol* 2003;88(5):879-903. doi:  
43 502 10.1037/0021-9010.88.5.879 [published Online First: 2003/10/01]  
44  
45  
46 503 50. Kanwar A, Singh M, Lennon R, et al. Frailty and health-related quality of life among residents of long-term care  
47 504 facilities. *J Aging Health* 2013;25(5):792-802. doi: 10.1177/0898264313493003 [published Online First:  
48 505 2013/06/27]  
49  
50  
51  
52  
53  
54  
55  
56  
57  
58  
59  
60

- 1  
2  
3 506 51. Mulasso A, Roppolo M, Rabaglietti E. The role of individual characteristics and physical frailty on health related  
4 507 quality of life (HRQOL): a cross sectional study of Italian community-dwelling older adults. *Arch Gerontol*  
5 508 *Geriatr* 2014;59(3):542-8. doi: 10.1016/j.archger.2014.08.012 [published Online First: 2014/09/14]  
6  
7  
8  
9 509 52. Huaxue L, Taifang L, Wenjing Y, et al. Status of frailty and its effect path on quality of life among the elderly in  
10 510 community. *Chinese Nursing Research* 2019;33(21):3645-49.  
11  
12 511 53. Kojima G. Frailty as a predictor of disabilities among community-dwelling older people: a systematic review and  
13 512 meta-analysis. *Disabil Rehabil* 2017;39(19):1897-908. doi: 10.1080/09638288.2016.1212282 [published  
14 513 Online First: 2016/08/26]  
15  
16  
17 514 54. Feng L, Zin Nyunt MS, Gao Q, et al. Cognitive Frailty and Adverse Health Outcomes: Findings From the  
18 515 Singapore Longitudinal Ageing Studies (SLAS). *J Am Med Dir Assoc* 2017;18(3):252-58. doi:  
19 516 10.1016/j.jamda.2016.09.015 [published Online First: 2016/11/14]  
20  
21  
22  
23 517 55. Akosile CO, Mgbeojedo UG, Maruf FA, et al. Depression, functional disability and quality of life among Nigerian  
24 518 older adults: Prevalences and relationships. *Arch Gerontol Geriatr* 2018;74:39-43. doi:  
25 519 10.1016/j.archger.2017.08.011 [published Online First: 2017/09/28]  
26  
27  
28 520 56. Shin KR, Byeon YS, Kang Y, et al. A study on physical symptom, activity of daily living, and health-related quality  
29 521 of life (HRQoL) in the community-dwelling older adults. *Taehan Kanho Hakhoe chi* 2008;38(3):437-44. doi:  
30 522 10.4040/jkan.2008.38.3.437 [published Online First: 2008/07/08]  
31  
32  
33  
34 523 57. Crimmins EM. Trends in the health of the elderly. *Annu Rev Public Health* 2004;25:79-98. doi:  
35 524 10.1146/annurev.publhealth.25.102802.124401 [published Online First: 2004/03/16]  
36  
37  
38 525 58. Khan ZA, Singh C, Khan T. Correlates of physical disability in the elderly population of Rural North India  
39 526 (Haryana). *J Family Community Med* 2018;25(3):199-204. doi: 10.4103/jfcm.JFCM\_160\_17 [published  
40 527 Online First: 2018/09/18]  
41  
42  
43 528 59. Wei M, Li J, Wang H. Impact of the disability trajectory on the mortality risk of older adults in China. *Arch*  
44 529 *Gerontol Geriatr* 2018;74:174-83. doi: 10.1016/j.archger.2017.10.015 [published Online First: 2017/11/11]  
45  
46  
47 530 60. Gobbens RJ. Associations of ADL and IADL disability with physical and mental dimensions of quality of life in  
48 531 people aged 75 years and older. *PeerJ* 2018;6:e5425. doi: 10.7717/peerj.5425 [published Online First:  
49 532 2018/08/21]  
50  
51  
52 533 61. Rejeski WJ, Brawley LR, Haskell WL. The prevention challenge: an overview of this supplement. *Am J Prev Med*  
53 534 2003;25(3 Suppl 2):107-9. doi: 10.1016/s0749-3797(03)00173-9 [published Online First: 2003/10/14]  
54



- 1  
2  
3 535 62. de Labra C, Guimaraes-Pinheiro C, Maseda A, et al. Effects of physical exercise interventions in frail older  
4 536 adults: a systematic review of randomized controlled trials. *BMC Geriatr* 2015;15:154. doi:  
5 537 10.1186/s12877-015-0155-4 [published Online First: 2015/12/03]  
6  
7  
8 538 63. Kortebein P, Ferrando A, Lombeida J, et al. Effect of 10 days of bed rest on skeletal muscle in healthy older  
9 539 adults. *JAMA* 2007;297(16):1772-4. doi: 10.1001/jama.297.16.1772-b [published Online First: 2007/04/26]  
10  
11  
12 540 64. Ávila-Funes JA, Pina-Escudero SD, Aguilar-Navarro S, et al. Cognitive impairment and low physical activity are  
13 541 the components of frailty more strongly associated with disability. *J Nutr Health Aging* 2011;15(8):683-9.  
14 542 doi: 10.1007/s12603-011-0111-8 [published Online First: 2011/10/05]  
15  
16  
17 543 65. Villareal DT, Chode S, Parimi N, et al. Weight loss, exercise, or both and physical function in obese older adults.  
18 544 *N Engl J Med* 2011;364(13):1218-29. doi: 10.1056/NEJMoa1008234 [published Online First: 2011/04/01]  
19  
20  
21 545 66. Maxwell SE, Cole DA, Mitchell MA. Bias in Cross-Sectional Analyses of Longitudinal Mediation: Partial and  
22 546 Complete Mediation Under an Autoregressive Model. *Multivariate Behav Res* 2011;46(5):816-41. doi:  
23 547 10.1080/00273171.2011.606716 [published Online First: 2011/09/30]  
24  
25  
26  
27 548  
28  
29 549  
30  
31 550  
32  
33  
34 551  
35  
36 552  
37  
38 553  
39  
40 554  
41  
42  
43 555  
44  
45 556  
46  
47 557  
48  
49 558  
50  
51 559  
52  
53  
54  
55  
56  
57  
58  
59  
60

1  
2  
3 560  
4  
5  
6 561  
7  
8 562  
9  
10 563  
11  
12  
13 564  
14 565  
15

**Table 1 Spearman correlations coefficients of main variables among the participants in Shandong, China, 2019(N=3243)**

| Variable              | M±SD/M(P <sub>25</sub> ,P <sub>75</sub> ) | 1        | 2        | 3       | 4 |
|-----------------------|-------------------------------------------|----------|----------|---------|---|
| 1.Physical frailty    | 1.511±1.071                               | 1        |          |         |   |
| 2.Physical disability | 16.994±4.36                               | 0.283**  | 1        |         |   |
| 3.Physical activity   | 2772(693,4158)                            | -0.378** | -0.194** | 1       |   |
| 4.HRQoL               | 0.896±0.161                               | -0.429** | -0.378** | 0.258** | 1 |

28 566 M±SD: mean ± standard deviation ;M (P<sub>25</sub>,P<sub>75</sub>): Median(Quartile<sub>1</sub>,Quartile<sub>3</sub>)

30 567 1,2,4 follow normal distribution and are described as M±SD.

32 568 3 does not follow normal distribution and is described as M (P<sub>25</sub>, P<sub>75</sub>).

34 569 \*\*P<0.001

36 570  
37 571

39 572 **Table 2 Testing the mediation effect of physical disability between physical frailty and HRQoL among the**  
40 573 **participants in Shandong, China, 2019**

| Predictors       | Model1(HRQoL) |            | Model2(Physical disability ) |           | Model3(HQRoL) |            |
|------------------|---------------|------------|------------------------------|-----------|---------------|------------|
|                  | β             | t          | β                            | t         | β             | t          |
| Age              | -0.018        | -0.731     | 0.166                        | 6.349***  | 0.061         | 2.758**    |
| Education        | 0.010         | 0.162      | -0.182                       | -8.326*** | -0.084        | -4.507***  |
| Physical frailty | -0.423        | -26.031*** | 0.295                        | 17.729*** | -0.280        | -18.957*** |

27

|                     |            |  |            |            |
|---------------------|------------|--|------------|------------|
| Physical disability |            |  | -0.482     | -32.407*** |
| R <sup>2</sup>      | 0.181      |  | 0.141      | 0.381      |
| F                   | 238.859*** |  | 176.932*** | 499.748*** |

574 \*\* $P < 0.01$ , \*\*\* $P < 0.001$

575

576

577

578

579 **Table 3 Total effect, direct effect and mediation effect**

|                        | Effect size | BootSE | BootCI |        | Relative effect value |
|------------------------|-------------|--------|--------|--------|-----------------------|
|                        |             |        | Low    | High   |                       |
| <b>Total effect</b>    | -0.423      | 0.020  | -0.461 | -0.382 |                       |
| <b>Direct effect</b>   | -0.280      | 0.017  | -0.313 | -0.247 | 66.29%                |
| <b>Indirect effect</b> | -0.143      | 0.016  | -0.175 | -0.113 | 33.71%                |

580 BootSE bootstrap standard error, BootCI bootstrap confidence interval

581

582

583

584

585

586

587

1  
2  
3 588  
4  
5  
6 589  
7  
8 590  
9  
10 591  
11  
12  
13 592  
14 593

**Table 4 Testing the moderated mediation effect of physical frailty on HRQoL among the participants in Shandong, China, 2019**

| Predictors                      | Model 1(Physical disability) |           | Model 2(HRQoL) |            |
|---------------------------------|------------------------------|-----------|----------------|------------|
|                                 | $\beta$                      | t         | $\beta$        | t          |
| Age                             | 0.154                        | 5.956***  | 0.062          | 2.763**    |
| Education                       | -0.181                       | -8.393*** | -0.072         | -3.830***  |
| Physical frailty                | 0.246                        | 13.965*** | -0.258         | -16.687*** |
| Physical activity               | -0.104                       | -5.555*** | 0.091          | 4.675***   |
| Physical frailty $\times$ PA    | -0.120                       | -7.058*** | 0.011          | 0.682      |
| Physical disability             |                              |           | -0.422         | -24.375*** |
| Physical disability $\times$ PA |                              |           | 0.115          | 6.104***   |
| R <sup>2</sup>                  | 0.159                        |           | 0.390          |            |
| F                               | 122.004***                   |           | 295.850***     |            |

42 594 \*\*  $P < 0.01$ , \*\*\*  $P < 0.001$

44 595  
45 596  
46 597  
47 598  
48 599

**Table 5 Mediating effect values at different levels of physical activity among the participants in Shandong, China, 2019**

| Physical activity | Effect | BootSE | BootLLCI | BootULCI |
|-------------------|--------|--------|----------|----------|
|-------------------|--------|--------|----------|----------|

29

|                   |        |       |        |        |
|-------------------|--------|-------|--------|--------|
| M-1SD(low level)  | -0.201 | 0.023 | -0.250 | -0.160 |
| M                 | -0.104 | 0.013 | -0.131 | -0.080 |
| M+1SD(high level) | -0.036 | 0.012 | -0.062 | -0.017 |

600 M mean, 1SD one standard deviation, BootSEbootstrap standard error, BootLLCIbootstrap lower limit  
 601 confidence interval, BootULCIbootstrap upper limit confidence interval.

602

603

604

605 **Fig. 1** The conceptual framework of the moderated mediation model

606 **Fig. 2** Simple slope analysis shows that physical frailty moderated the relationship between physical frailty and  
 607 physical disability

608 **Fig.3** Simple slope analysis shows that physical activity moderated the relationship between physical disability and  
 609 HRQoL

610

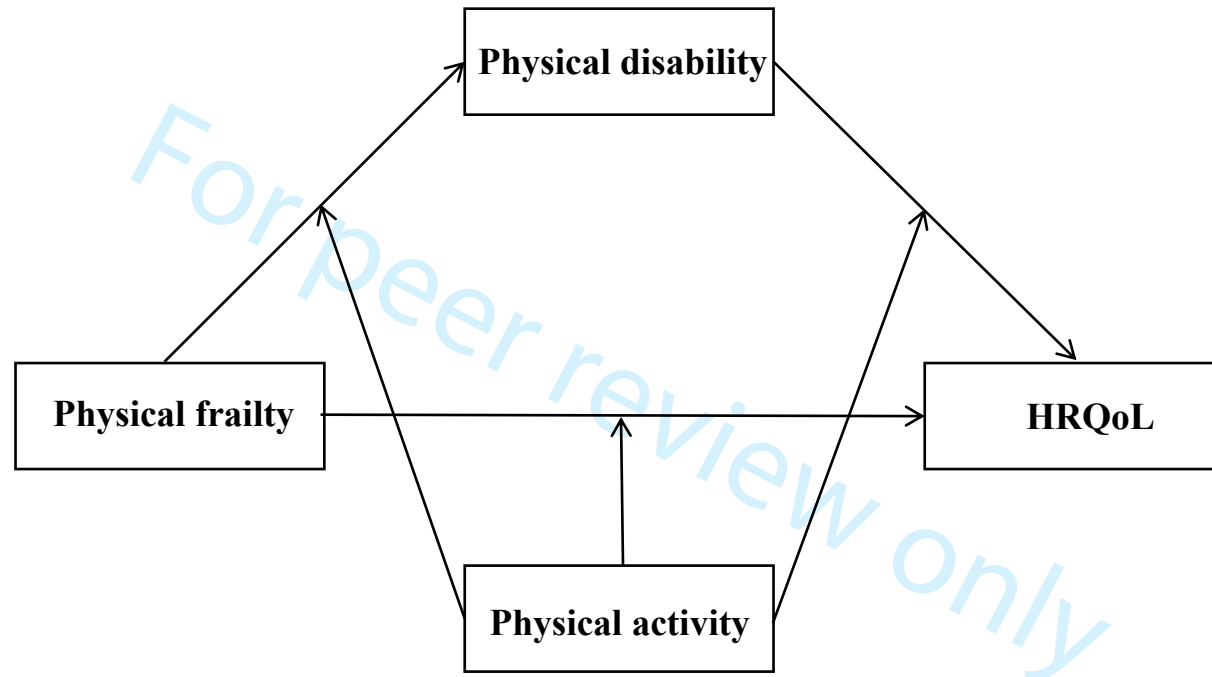

Fig1. The conceptual framework of the moderated mediation model



Fig2.Simple slope analysis shows that physical activity moderated the relationship between physical frailty and physical disability

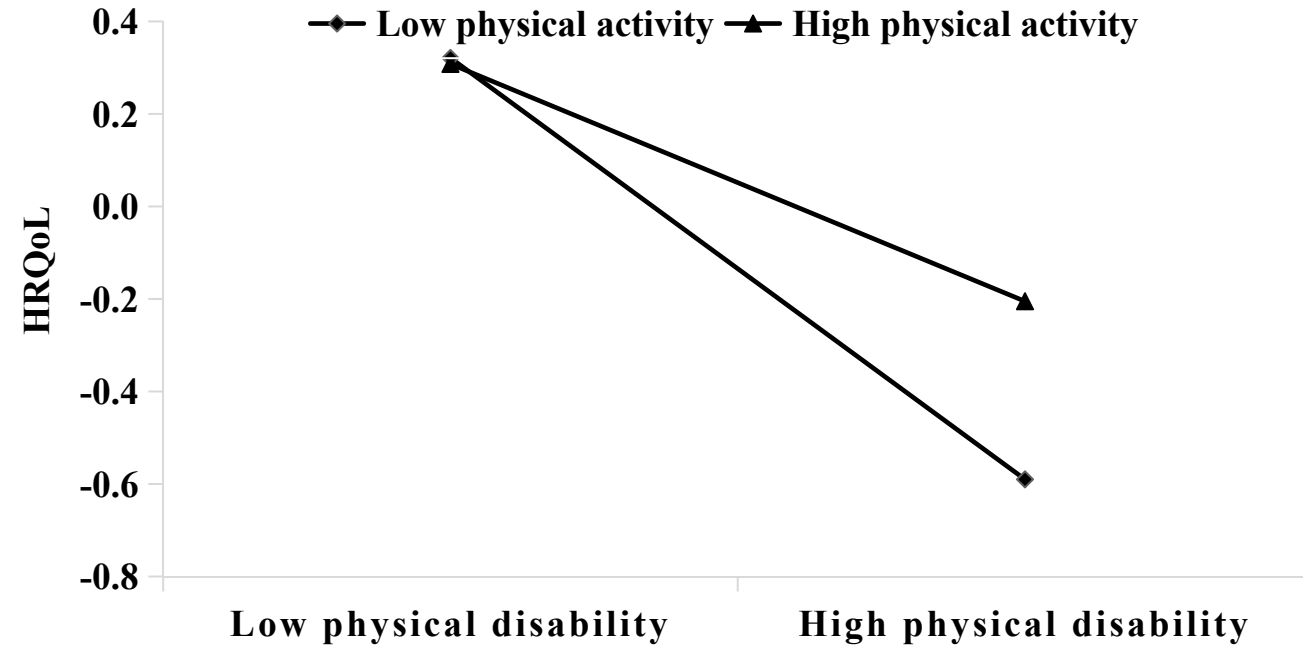

Fig3. Simple slope analysis shows that physical activity moderated the relationship between physical disability and HRQoL



STROBE Statement—Checklist of items that should be included in reports of *cross-sectional studies*

|                           | Item No | Recommendation                                                                                                                                                                                    | Page No |
|---------------------------|---------|---------------------------------------------------------------------------------------------------------------------------------------------------------------------------------------------------|---------|
| <b>Title and abstract</b> | 1       | (a) Indicate the study's design with a commonly used term in the title or the abstract                                                                                                            | P2      |
|                           |         | (b) Provide in the abstract an informative and balanced summary of what was done and what was found                                                                                               | P2      |
| <b>Introduction</b>       |         |                                                                                                                                                                                                   |         |
| Background/rationale      | 2       | Explain the scientific background and rationale for the investigation being reported                                                                                                              | P4-P5   |
| Objectives                | 3       | State specific objectives, including any prespecified hypotheses                                                                                                                                  | P5-P6   |
| <b>Methods</b>            |         |                                                                                                                                                                                                   |         |
| Study design              | 4       | Present key elements of study design early in the paper                                                                                                                                           | P6      |
| Setting                   | 5       | Describe the setting, locations, and relevant dates, including periods of recruitment, exposure, follow-up, and data collection                                                                   | P6      |
| Participants              | 6       | (a) Give the eligibility criteria, and the sources and methods of selection of participants                                                                                                       | P6      |
| Variables                 | 7       | Clearly define all outcomes, exposures, predictors, potential confounders, and effect modifiers. Give diagnostic criteria, if applicable                                                          | P7      |
| Data sources/measurement  | 8*      | For each variable of interest, give sources of data and details of methods of assessment (measurement). Describe comparability of assessment methods if there is more than one group              | P7      |
| Bias                      | 9       | Describe any efforts to address potential sources of bias                                                                                                                                         | P10     |
| Study size                | 10      | Explain how the study size was arrived at                                                                                                                                                         | P6-P9   |
| Quantitative variables    | 11      | Explain how quantitative variables were handled in the analyses. If applicable, describe which groupings were chosen and why                                                                      | P6-P9   |
| Statistical methods       | 12      | (a) Describe all statistical methods, including those used to control for confounding                                                                                                             | P9      |
|                           |         | (b) Describe any methods used to examine subgroups and interactions                                                                                                                               |         |
|                           |         | (c) Explain how missing data were addressed                                                                                                                                                       |         |
|                           |         | (d) If applicable, describe analytical methods taking account of sampling strategy                                                                                                                | P9      |
|                           |         | (e) Describe any sensitivity analyses                                                                                                                                                             |         |
| <b>Results</b>            |         |                                                                                                                                                                                                   |         |
| Participants              | 13*     | (a) Report numbers of individuals at each stage of study—eg numbers potentially eligible, examined for eligibility, confirmed eligible, included in the study, completing follow-up, and analysed |         |
|                           |         | (b) Give reasons for non-participation at each stage                                                                                                                                              |         |
|                           |         | (c) Consider use of a flow diagram                                                                                                                                                                |         |
| Descriptive data          | 14*     | (a) Give characteristics of study participants (eg demographic, clinical, social) and information on exposures and potential confounders                                                          | P10     |
|                           |         | (b) Indicate number of participants with missing data for each variable of interest                                                                                                               |         |
| Outcome data              | 15*     | Report numbers of outcome events or summary measures                                                                                                                                              | P10-    |

|    |                          |    |                                                                                                                                                                                                              |
|----|--------------------------|----|--------------------------------------------------------------------------------------------------------------------------------------------------------------------------------------------------------------|
| 1  |                          |    |                                                                                                                                                                                                              |
| 2  | Main results             | 16 | (a) Give unadjusted estimates and, if applicable, confounder-adjusted estimates and their precision (eg, 95% confidence interval). Make clear which confounders were adjusted for and why they were included |
| 3  |                          |    |                                                                                                                                                                                                              |
| 4  |                          |    |                                                                                                                                                                                                              |
| 5  |                          |    |                                                                                                                                                                                                              |
| 6  |                          |    | (b) Report category boundaries when continuous variables were categorized                                                                                                                                    |
| 7  |                          |    |                                                                                                                                                                                                              |
| 8  |                          |    | (c) If relevant, consider translating estimates of relative risk into absolute risk for a meaningful time period                                                                                             |
| 9  |                          |    |                                                                                                                                                                                                              |
| 10 |                          |    |                                                                                                                                                                                                              |
| 11 | Other analyses           | 17 | Report other analyses done—eg analyses of subgroups and interactions, and sensitivity analyses                                                                                                               |
| 12 |                          |    |                                                                                                                                                                                                              |
| 13 |                          |    |                                                                                                                                                                                                              |
| 14 | <b>Discussion</b>        |    |                                                                                                                                                                                                              |
| 15 | Key results              | 18 | Summarise key results with reference to study objectives                                                                                                                                                     |
| 16 | Limitations              | 19 | Discuss limitations of the study, taking into account sources of potential bias or imprecision. Discuss both direction and magnitude of any potential bias                                                   |
| 17 |                          |    |                                                                                                                                                                                                              |
| 18 |                          |    |                                                                                                                                                                                                              |
| 19 |                          |    |                                                                                                                                                                                                              |
| 20 | Interpretation           | 20 | Give a cautious overall interpretation of results considering objectives, limitations, multiplicity of analyses, results from similar studies, and other relevant evidence                                   |
| 21 |                          |    |                                                                                                                                                                                                              |
| 22 |                          |    |                                                                                                                                                                                                              |
| 23 |                          |    |                                                                                                                                                                                                              |
| 24 | Generalisability         | 21 | Discuss the generalisability (external validity) of the study results                                                                                                                                        |
| 25 |                          |    |                                                                                                                                                                                                              |
| 26 | <b>Other information</b> |    |                                                                                                                                                                                                              |
| 27 | Funding                  | 22 | Give the source of funding and the role of the funders for the present study and, if applicable, for the original study on which the present article is based                                                |
| 28 |                          |    |                                                                                                                                                                                                              |
| 29 |                          |    |                                                                                                                                                                                                              |
| 30 |                          |    |                                                                                                                                                                                                              |

\*Give information separately for exposed and unexposed groups.

**Note:** An Explanation and Elaboration article discusses each checklist item and gives methodological background and published examples of transparent reporting. The STROBE checklist is best used in conjunction with this article (freely available on the Web sites of PLoS Medicine at <http://www.plosmedicine.org/>, Annals of Internal Medicine at <http://www.annals.org/>, and Epidemiology at <http://www.epidem.com/>). Information on the STROBE Initiative is available at [www.strobe-statement.org](http://www.strobe-statement.org).
